# Supplementary material for: Discovery of reactive peptide inhibitors of human papillomavirus oncoprotein E6
Source: Royal Society of Chemistry journal article supplement (doi:10.1039/d3sc02782a), 2023-01-01
Supplement: d3sc02782a2.xlsx [file d3sc02782a2.xlsx]

## Sheet: Key
Column label	Description
Gene	Name of the identified gene
Protein	Name of the identified protein
Est_Fc	Estimated protein log2 fold changes from reference to sample condition
Pval	calculated P value for Est_Fc
Qval	calculated Q value for Est_Fc
Reference_condition	The initial condition that the comparison is made against
Comparision_condition	The comparitor condition that the comparison is made against
Is_outlier	Whether the protein is an outlier to the model (Yes/No)
modelFit	Type of model fit (lmer, lm)

## Sheet: HT1080 13-3L3A-bio vs. 13-bio
Gene	Protein	Est_Fc	Pval	Qval	Reference_condition	Comparision_condition	Is_outlier	modelFit
SEC63	sp|Q9UGP8|SEC63_HUMAN	5.70009	41.625	39.0556	Factor_Treatment_HT1080_13-3L3A-biotin	HT1080_13-biotin	No	lmer
TUBB2A	sp|Q13885|TBB2A_HUMAN	2.35989	19.1148	16.8465	Factor_Treatment_HT1080_13-3L3A-biotin	HT1080_13-biotin	No	lmer
SLC16A3	sp|O15427|MOT4_HUMAN	2.4283	17.4308	15.3386	Factor_Treatment_HT1080_13-3L3A-biotin	HT1080_13-biotin	No	lm
ATP2A2	sp|P16615|AT2A2_HUMAN	2.34383	14.6328	12.6655	Factor_Treatment_HT1080_13-3L3A-biotin	HT1080_13-biotin	No	lmer
PCCB	tr|E7EX59|E7EX59_HUMAN	-2.32986	13.5614	11.691	Factor_Treatment_HT1080_13-3L3A-biotin	HT1080_13-biotin	No	lmer
DLST	sp|P36957|ODO2_HUMAN	2.69047	13.1266	11.3353	Factor_Treatment_HT1080_13-3L3A-biotin	HT1080_13-biotin	No	lmer
TUBA1C	tr|F5H5D3|F5H5D3_HUMAN	2.2606	12.8668	11.1425	Factor_Treatment_HT1080_13-3L3A-biotin	HT1080_13-biotin	No	lmer
UGGT1	sp|Q9NYU2|UGGG1_HUMAN	1.67304	12.6739	11.0076	Factor_Treatment_HT1080_13-3L3A-biotin	HT1080_13-biotin	No	lmer
TUBB6	sp|Q9BUF5|TBB6_HUMAN	2.10307	11.782	10.1669	Factor_Treatment_HT1080_13-3L3A-biotin	HT1080_13-biotin	No	lmer
GLRX3	sp|O76003|GLRX3_HUMAN	2.98878	10.8571	9.28776	Factor_Treatment_HT1080_13-3L3A-biotin	HT1080_13-biotin	No	lmer
ASPH	sp|Q12797|ASPH_HUMAN	2.33001	10.1398	8.61183	Factor_Treatment_HT1080_13-3L3A-biotin	HT1080_13-biotin	No	lmer
PFKP	sp|Q01813|PFKAP_HUMAN	2.94996	9.54559	8.05539	Factor_Treatment_HT1080_13-3L3A-biotin	HT1080_13-biotin	No	lm
AIFM1	sp|O95831|AIFM1_HUMAN	1.46994	8.30202	6.84658	Factor_Treatment_HT1080_13-3L3A-biotin	HT1080_13-biotin	No	lm
PRKDC	sp|P78527|PRKDC_HUMAN	1.8729	8.13637	6.71313	Factor_Treatment_HT1080_13-3L3A-biotin	HT1080_13-biotin	No	lmer
CSE1L	sp|P55060|XPO2_HUMAN	3.40974	8.04414	6.65085	Factor_Treatment_HT1080_13-3L3A-biotin	HT1080_13-biotin	No	lm
BZW1	sp|Q7L1Q6|BZW1_HUMAN	2.32683	7.45492	6.08967	Factor_Treatment_HT1080_13-3L3A-biotin	HT1080_13-biotin	No	lm
RPN1	sp|P04843|RPN1_HUMAN	2.33201	7.17443	5.8355	Factor_Treatment_HT1080_13-3L3A-biotin	HT1080_13-biotin	No	lmer
SLC3A2	tr|J3KPF3|J3KPF3_HUMAN	1.97843	6.55556	5.24146	Factor_Treatment_HT1080_13-3L3A-biotin	HT1080_13-biotin	No	lmer
PCBP2	sp|Q15366|PCBP2_HUMAN	2.9226	6.22801	4.93739	Factor_Treatment_HT1080_13-3L3A-biotin	HT1080_13-biotin	No	lm
MAP1B	sp|P46821|MAP1B_HUMAN	1.97592	6.20251	4.93417	Factor_Treatment_HT1080_13-3L3A-biotin	HT1080_13-biotin	No	lm
COPB1	sp|P53618|COPB_HUMAN	2.39539	6.15049	4.90333	Factor_Treatment_HT1080_13-3L3A-biotin	HT1080_13-biotin	No	lm
SLC7A5	sp|Q01650|LAT1_HUMAN	1.93722	5.78097	4.57332	Factor_Treatment_HT1080_13-3L3A-biotin	HT1080_13-biotin	No	lmer
ARFGEF1	sp|Q9Y6D6|BIG1_HUMAN	2.83909	5.78324	4.57332	Factor_Treatment_HT1080_13-3L3A-biotin	HT1080_13-biotin	No	lmer
PCCA	sp|P05165|PCCA_HUMAN	-1.39368	5.71683	4.53456	Factor_Treatment_HT1080_13-3L3A-biotin	HT1080_13-biotin	No	lmer
TXN	sp|P10599|THIO_HUMAN	1.99953	5.706	4.53456	Factor_Treatment_HT1080_13-3L3A-biotin	HT1080_13-biotin	No	lm
MYH9	sp|P35579|MYH9_HUMAN	1.8445	5.35393	4.19953	Factor_Treatment_HT1080_13-3L3A-biotin	HT1080_13-biotin	No	lmer
MAGED2	sp|Q9UNF1|MAGD2_HUMAN	2.24541	5.16952	4.03151	Factor_Treatment_HT1080_13-3L3A-biotin	HT1080_13-biotin	No	lm
CANX	sp|P27824|CALX_HUMAN	1.83952	5.02707	3.92009	Factor_Treatment_HT1080_13-3L3A-biotin	HT1080_13-biotin	No	lm
MYH10	sp|P35580|MYH10_HUMAN	1.87823	5.03663	3.92009	Factor_Treatment_HT1080_13-3L3A-biotin	HT1080_13-biotin	No	lmer
XPO1	sp|O14980|XPO1_HUMAN	2.14594	4.81617	3.72392	Factor_Treatment_HT1080_13-3L3A-biotin	HT1080_13-biotin	No	lmer
XPOT	sp|O43592|XPOT_HUMAN	1.90867	4.65538	3.57736	Factor_Treatment_HT1080_13-3L3A-biotin	HT1080_13-biotin	No	lm
ELOVL1	sp|Q9BW60|ELOV1_HUMAN	1.92771	4.58632	3.52209	Factor_Treatment_HT1080_13-3L3A-biotin	HT1080_13-biotin	No	lm
SELENOF	sp|O60613|SEP15_HUMAN	1.55533	4.42499	3.37622	Factor_Treatment_HT1080_13-3L3A-biotin	HT1080_13-biotin	No	lm
CAND1	sp|Q86VP6|CAND1_HUMAN	2.51603	4.41411	3.37622	Factor_Treatment_HT1080_13-3L3A-biotin	HT1080_13-biotin	No	lmer
CALU	sp|O43852|CALU_HUMAN	1.70573	4.33373	3.30843	Factor_Treatment_HT1080_13-3L3A-biotin	HT1080_13-biotin	No	lmer
KPNB1	sp|Q14974|IMB1_HUMAN	2.33471	4.15806	3.14499	Factor_Treatment_HT1080_13-3L3A-biotin	HT1080_13-biotin	No	lmer
TUBA1A	sp|Q71U36|TBA1A_HUMAN	1.89537	3.97052	2.96935	Factor_Treatment_HT1080_13-3L3A-biotin	HT1080_13-biotin	No	lm
CCN2	sp|P29279|CCN2_HUMAN	2.01195	3.90395	2.92564	Factor_Treatment_HT1080_13-3L3A-biotin	HT1080_13-biotin	No	lm
PSMC1	sp|P62191|PRS4_HUMAN	2.3292	3.90603	2.92564	Factor_Treatment_HT1080_13-3L3A-biotin	HT1080_13-biotin	No	lm
ALG1	sp|Q9BT22|ALG1_HUMAN	1.67197	3.79137	2.82405	Factor_Treatment_HT1080_13-3L3A-biotin	HT1080_13-biotin	No	lm
TUBA4A	sp|P68366|TBA4A_HUMAN	2.08589	3.77259	2.816	Factor_Treatment_HT1080_13-3L3A-biotin	HT1080_13-biotin	No	lm
TXNRD1	sp|Q16881|TRXR1_HUMAN	1.24654	3.74531	2.79918	Factor_Treatment_HT1080_13-3L3A-biotin	HT1080_13-biotin	No	lmer
RCN1	sp|Q15293|RCN1_HUMAN	1.94358	3.65194	2.71603	Factor_Treatment_HT1080_13-3L3A-biotin	HT1080_13-biotin	No	lm
EP400	sp|Q96L91|EP400_HUMAN	-1.56314	3.62054	2.69462	Factor_Treatment_HT1080_13-3L3A-biotin	HT1080_13-biotin	No	lm
ACACA	sp|Q13085|ACACA_HUMAN	-0.872713	3.47085	2.56423	Factor_Treatment_HT1080_13-3L3A-biotin	HT1080_13-biotin	No	lmer
HSPA1B	tr|A0A0G2JIW1|A0A0G2JIW1_HUMAN	1.75117	3.47558	2.56423	Factor_Treatment_HT1080_13-3L3A-biotin	HT1080_13-biotin	No	lmer
LDHA	sp|P00338|LDHA_HUMAN	2.38039	3.37635	2.47907	Factor_Treatment_HT1080_13-3L3A-biotin	HT1080_13-biotin	No	lm
SEC13	sp|P55735|SEC13_HUMAN	1.452	3.34799	2.45986	Factor_Treatment_HT1080_13-3L3A-biotin	HT1080_13-biotin	No	lm
TOR1AIP2	sp|Q8NFQ8|TOIP2_HUMAN	2.094	3.30147	2.4223	Factor_Treatment_HT1080_13-3L3A-biotin	HT1080_13-biotin	No	lm
SPTLC2	sp|O15270|SPTC2_HUMAN	2.35963	3.28178	2.41138	Factor_Treatment_HT1080_13-3L3A-biotin	HT1080_13-biotin	No	lm
HSD17B12	sp|Q53GQ0|DHB12_HUMAN	1.74954	3.26575	2.40394	Factor_Treatment_HT1080_13-3L3A-biotin	HT1080_13-biotin	No	lm
CIP2A	tr|A0A087X211|A0A087X211_HUMAN	2.71704	3.17606	2.33096	Factor_Treatment_HT1080_13-3L3A-biotin	HT1080_13-biotin	No	lm
IPO7	sp|O95373|IPO7_HUMAN	2.57069	3.18382	2.33096	Factor_Treatment_HT1080_13-3L3A-biotin	HT1080_13-biotin	No	lmer
ACTG1	sp|P63261|ACTG_HUMAN	1.23111	3.13609	2.29911	Factor_Treatment_HT1080_13-3L3A-biotin	HT1080_13-biotin	No	lmer
NCAPD2	sp|Q15021|CND1_HUMAN	2.72532	3.10451	2.2755	Factor_Treatment_HT1080_13-3L3A-biotin	HT1080_13-biotin	No	lm
TUBA3D	sp|P0DPH8|TBA3D_HUMAN	2.42641	3.091	2.26981	Factor_Treatment_HT1080_13-3L3A-biotin	HT1080_13-biotin	No	lm
LTN1	sp|O94822|LTN1_HUMAN	1.80854	3.05485	2.24135	Factor_Treatment_HT1080_13-3L3A-biotin	HT1080_13-biotin	No	lm
ACTA2	sp|P62736|ACTA_HUMAN	1.77195	3.03003	2.23024	Factor_Treatment_HT1080_13-3L3A-biotin	HT1080_13-biotin	No	lmer
RCN2	sp|Q14257|RCN2_HUMAN	2.18681	3.02876	2.23024	Factor_Treatment_HT1080_13-3L3A-biotin	HT1080_13-biotin	No	lmer
TECR	tr|M0R2N5|M0R2N5_HUMAN	2.2985	2.983	2.19178	Factor_Treatment_HT1080_13-3L3A-biotin	HT1080_13-biotin	No	lm
SLC1A5	sp|Q15758|AAAT_HUMAN	2.4344	2.93496	2.15092	Factor_Treatment_HT1080_13-3L3A-biotin	HT1080_13-biotin	No	lm
DYNC1H1	sp|Q14204|DYHC1_HUMAN	1.56678	2.88411	2.12092	Factor_Treatment_HT1080_13-3L3A-biotin	HT1080_13-biotin	No	lmer
GSN	sp|P06396|GELS_HUMAN	1.45541	2.8852	2.12092	Factor_Treatment_HT1080_13-3L3A-biotin	HT1080_13-biotin	No	lm
TXNL1	sp|O43396|TXNL1_HUMAN	3.09608	2.8865	2.12092	Factor_Treatment_HT1080_13-3L3A-biotin	HT1080_13-biotin	No	lm
ECPAS	tr|J3KN16|J3KN16_HUMAN	2.66382	2.86698	2.11052	Factor_Treatment_HT1080_13-3L3A-biotin	HT1080_13-biotin	No	lm
TNPO1	sp|Q92973|TNPO1_HUMAN	2.50453	2.82306	2.07323	Factor_Treatment_HT1080_13-3L3A-biotin	HT1080_13-biotin	No	lmer
HSPA8	sp|P11142|HSP7C_HUMAN	1.34549	2.80264	2.05934	Factor_Treatment_HT1080_13-3L3A-biotin	HT1080_13-biotin	No	lmer
MAN1B1	sp|Q9UKM7|MA1B1_HUMAN	8.16806	2.77693	2.04099	Factor_Treatment_HT1080_13-3L3A-biotin	HT1080_13-biotin	No	lm
XPO5	sp|Q9HAV4|XPO5_HUMAN	2.8209	2.77152	2.04099	Factor_Treatment_HT1080_13-3L3A-biotin	HT1080_13-biotin	No	lm
SLC16A1	sp|P53985|MOT1_HUMAN	2.2911	2.75119	2.02691	Factor_Treatment_HT1080_13-3L3A-biotin	HT1080_13-biotin	No	lm
TMX3	sp|Q96JJ7|TMX3_HUMAN	3.03908	2.74149	2.02337	Factor_Treatment_HT1080_13-3L3A-biotin	HT1080_13-biotin	No	lm
BZW2	sp|Q9Y6E2|BZW2_HUMAN	2.23121	2.70381	1.99776	Factor_Treatment_HT1080_13-3L3A-biotin	HT1080_13-biotin	No	lm
MAD2L1	sp|Q13257|MD2L1_HUMAN	2.24591	2.70449	1.99776	Factor_Treatment_HT1080_13-3L3A-biotin	HT1080_13-biotin	No	lm
MCCC2	sp|Q9HCC0|MCCB_HUMAN	-1.06281	2.68791	1.98777	Factor_Treatment_HT1080_13-3L3A-biotin	HT1080_13-biotin	No	lmer
GEMIN4	sp|P57678|GEMI4_HUMAN	1.3515	2.67505	1.98074	Factor_Treatment_HT1080_13-3L3A-biotin	HT1080_13-biotin	No	lmer
EGFR	sp|P00533|EGFR_HUMAN	1.33862	2.62364	1.93508	Factor_Treatment_HT1080_13-3L3A-biotin	HT1080_13-biotin	No	lm
TMEM165	sp|Q9HC07|TM165_HUMAN	2.12492	2.55037	1.86749	Factor_Treatment_HT1080_13-3L3A-biotin	HT1080_13-biotin	No	lm
UQCRC2	sp|P22695|QCR2_HUMAN	2.05051	2.46043	1.78315	Factor_Treatment_HT1080_13-3L3A-biotin	HT1080_13-biotin	No	lm
MBOAT7	sp|Q96N66|MBOA7_HUMAN	2.79473	2.44567	1.77392	Factor_Treatment_HT1080_13-3L3A-biotin	HT1080_13-biotin	No	lm
CDK1	sp|P06493|CDK1_HUMAN	1.72656	2.41839	1.7575	Factor_Treatment_HT1080_13-3L3A-biotin	HT1080_13-biotin	No	lm
TIMM50	sp|Q3ZCQ8|TIM50_HUMAN	2.30491	2.42185	1.7575	Factor_Treatment_HT1080_13-3L3A-biotin	HT1080_13-biotin	No	lm
DNAJB11	sp|Q9UBS4|DJB11_HUMAN	1.54086	2.3754	1.7251	Factor_Treatment_HT1080_13-3L3A-biotin	HT1080_13-biotin	No	lm
HSPD1	sp|P10809|CH60_HUMAN	2.02034	2.37808	1.7251	Factor_Treatment_HT1080_13-3L3A-biotin	HT1080_13-biotin	No	lmer
XIAP	sp|P98170|XIAP_HUMAN	1.58855	2.338	1.69291	Factor_Treatment_HT1080_13-3L3A-biotin	HT1080_13-biotin	No	lm
ATL3	sp|Q6DD88|ATLA3_HUMAN	1.79502	2.32963	1.68968	Factor_Treatment_HT1080_13-3L3A-biotin	HT1080_13-biotin	No	lm
PRMT1	sp|Q99873|ANM1_HUMAN	2.68787	2.31368	1.6788	Factor_Treatment_HT1080_13-3L3A-biotin	HT1080_13-biotin	No	lm
PCNA	sp|P12004|PCNA_HUMAN	2.50224	2.30206	1.6722	Factor_Treatment_HT1080_13-3L3A-biotin	HT1080_13-biotin	No	lm
BOLA2-SMG1P6	tr|H3BVE0|H3BVE0_HUMAN	3.69471	2.28987	1.66498	Factor_Treatment_HT1080_13-3L3A-biotin	HT1080_13-biotin	No	lm
TFRC	sp|P02786|TFR1_HUMAN	2.08818	2.26603	1.64605	Factor_Treatment_HT1080_13-3L3A-biotin	HT1080_13-biotin	No	lm
GOLGB1	sp|Q14789|GOGB1_HUMAN	5.85192	2.23848	1.62335	Factor_Treatment_HT1080_13-3L3A-biotin	HT1080_13-biotin	No	lm
M6PR	sp|P20645|MPRD_HUMAN	3.8906	2.21542	1.62322	Factor_Treatment_HT1080_13-3L3A-biotin	HT1080_13-biotin	No	lm
HEATR1	sp|Q9H583|HEAT1_HUMAN	2.15158	2.22242	1.62322	Factor_Treatment_HT1080_13-3L3A-biotin	HT1080_13-biotin	No	lm
PC	sp|P11498|PYC_HUMAN	-0.928829	2.22697	1.62322	Factor_Treatment_HT1080_13-3L3A-biotin	HT1080_13-biotin	No	lmer
THBS1	sp|P07996|TSP1_HUMAN	2.26669	2.21487	1.62322	Factor_Treatment_HT1080_13-3L3A-biotin	HT1080_13-biotin	No	lm
LOXL2	sp|Q9Y4K0|LOXL2_HUMAN	2.10041	2.2259	1.62322	Factor_Treatment_HT1080_13-3L3A-biotin	HT1080_13-biotin	No	lm
NCEH1	tr|A0A0A0MTJ9|A0A0A0MTJ9_HUMAN	2.13743	2.19245	1.60534	Factor_Treatment_HT1080_13-3L3A-biotin	HT1080_13-biotin	No	lm
PPP6R3	sp|Q5H9R7|PP6R3_HUMAN	1.79769	2.17425	1.59165	Factor_Treatment_HT1080_13-3L3A-biotin	HT1080_13-biotin	No	lm
IPO4	sp|Q8TEX9|IPO4_HUMAN	2.65954	2.16975	1.5916	Factor_Treatment_HT1080_13-3L3A-biotin	HT1080_13-biotin	No	lm
CKAP4	sp|Q07065|CKAP4_HUMAN	2.28563	2.15347	1.58409	Factor_Treatment_HT1080_13-3L3A-biotin	HT1080_13-biotin	No	lm
OGDH	tr|E9PCR7|E9PCR7_HUMAN	2.03144	2.15688	1.58409	Factor_Treatment_HT1080_13-3L3A-biotin	HT1080_13-biotin	No	lm
IQGAP3	sp|Q86VI3|IQGA3_HUMAN	1.68453	2.13536	1.5703	Factor_Treatment_HT1080_13-3L3A-biotin	HT1080_13-biotin	No	lm
PPFIBP1	sp|Q86W92|LIPB1_HUMAN	2.42957	2.11394	1.55317	Factor_Treatment_HT1080_13-3L3A-biotin	HT1080_13-biotin	No	lm
SSBP1	sp|Q04837|SSBP_HUMAN	0.937597	2.1064	1.54987	Factor_Treatment_HT1080_13-3L3A-biotin	HT1080_13-biotin	No	lm
IPO11	sp|Q9UI26|IPO11_HUMAN	1.88927	2.10087	1.54853	Factor_Treatment_HT1080_13-3L3A-biotin	HT1080_13-biotin	No	lm
EEF2	sp|P13639|EF2_HUMAN	2.22019	2.09073	1.54255	Factor_Treatment_HT1080_13-3L3A-biotin	HT1080_13-biotin	No	lmer
GCN1	sp|Q92616|GCN1_HUMAN	1.61785	2.07219	1.53854	Factor_Treatment_HT1080_13-3L3A-biotin	HT1080_13-biotin	No	lmer
PDIA6	sp|Q15084|PDIA6_HUMAN	1.9486	2.07048	1.53854	Factor_Treatment_HT1080_13-3L3A-biotin	HT1080_13-biotin	No	lm
RPS6	sp|P62753|RS6_HUMAN	1.75788	2.07288	1.53854	Factor_Treatment_HT1080_13-3L3A-biotin	HT1080_13-biotin	No	lm
CNP	sp|P09543|CN37_HUMAN	3.14584	2.0735	1.53854	Factor_Treatment_HT1080_13-3L3A-biotin	HT1080_13-biotin	No	lm
SCD	sp|O00767|ACOD_HUMAN	1.88731	2.05164	1.52759	Factor_Treatment_HT1080_13-3L3A-biotin	HT1080_13-biotin	No	lm
SMC2	sp|O95347|SMC2_HUMAN	1.78545	2.05416	1.52759	Factor_Treatment_HT1080_13-3L3A-biotin	HT1080_13-biotin	No	lm
NUP205	sp|Q92621|NU205_HUMAN	2.20291	2.04585	1.52569	Factor_Treatment_HT1080_13-3L3A-biotin	HT1080_13-biotin	No	lm
IGF2BP1	sp|Q9NZI8|IF2B1_HUMAN	1.22209	2.04002	1.52372	Factor_Treatment_HT1080_13-3L3A-biotin	HT1080_13-biotin	No	lm
NUP93	tr|H3BVG0|H3BVG0_HUMAN	1.27988	2.03255	1.5223	Factor_Treatment_HT1080_13-3L3A-biotin	HT1080_13-biotin	No	lm
EEF1A1	sp|P68104|EF1A1_HUMAN	1.48099	2.02966	1.5223	Factor_Treatment_HT1080_13-3L3A-biotin	HT1080_13-biotin	No	lmer
SUN2	sp|Q9UH99|SUN2_HUMAN	1.67635	2.02721	1.5223	Factor_Treatment_HT1080_13-3L3A-biotin	HT1080_13-biotin	No	lm
PSMD2	sp|Q13200|PSMD2_HUMAN	2.79353	2.02191	1.52072	Factor_Treatment_HT1080_13-3L3A-biotin	HT1080_13-biotin	No	lm
SSR1	tr|C9IZQ1|C9IZQ1_HUMAN	2.1638	2.0041	1.5066	Factor_Treatment_HT1080_13-3L3A-biotin	HT1080_13-biotin	No	lm
SQOR	sp|Q9Y6N5|SQOR_HUMAN	1.49909	1.95868	1.46485	Factor_Treatment_HT1080_13-3L3A-biotin	HT1080_13-biotin	No	lm
HSPB1	sp|P04792|HSPB1_HUMAN	2.04326	1.93396	1.44377	Factor_Treatment_HT1080_13-3L3A-biotin	HT1080_13-biotin	No	lmer
MCCC1	sp|Q96RQ3|MCCA_HUMAN	-0.904932	1.90292	1.43392	Factor_Treatment_HT1080_13-3L3A-biotin	HT1080_13-biotin	No	lmer
TPM3	tr|A0A087WWU8|A0A087WWU8_HUMAN	1.6734	1.90718	1.43392	Factor_Treatment_HT1080_13-3L3A-biotin	HT1080_13-biotin	No	lm
CCT5	sp|P48643|TCPE_HUMAN	2.72392	1.91216	1.43392	Factor_Treatment_HT1080_13-3L3A-biotin	HT1080_13-biotin	No	lm
ARF4	sp|P18085|ARF4_HUMAN	1.99955	1.90298	1.43392	Factor_Treatment_HT1080_13-3L3A-biotin	HT1080_13-biotin	No	lm
ITPRIP	sp|Q8IWB1|IPRI_HUMAN	1.62773	1.91438	1.43392	Factor_Treatment_HT1080_13-3L3A-biotin	HT1080_13-biotin	No	lm
NPM1	sp|P06748|NPM_HUMAN	2.31239	1.90686	1.43392	Factor_Treatment_HT1080_13-3L3A-biotin	HT1080_13-biotin	No	lm
IPO9	sp|Q96P70|IPO9_HUMAN	3.37389	1.89069	1.42512	Factor_Treatment_HT1080_13-3L3A-biotin	HT1080_13-biotin	No	lm
EIF4A1	sp|P60842|IF4A1_HUMAN	1.48365	1.80013	1.33862	Factor_Treatment_HT1080_13-3L3A-biotin	HT1080_13-biotin	No	lm
CCT6A	sp|P40227|TCPZ_HUMAN	-1.29597	1.79741	1.33862	Factor_Treatment_HT1080_13-3L3A-biotin	HT1080_13-biotin	No	lm
PPM1G	sp|O15355|PPM1G_HUMAN	1.8942	1.78551	1.33008	Factor_Treatment_HT1080_13-3L3A-biotin	HT1080_13-biotin	No	lm
ATP5F1B	sp|P06576|ATPB_HUMAN	1.80498	1.76611	1.31401	Factor_Treatment_HT1080_13-3L3A-biotin	HT1080_13-biotin	No	lm
PSMD11	sp|O00231|PSD11_HUMAN	2.57502	1.7508	1.302	Factor_Treatment_HT1080_13-3L3A-biotin	HT1080_13-biotin	No	lm
TRIM28	sp|Q13263|TIF1B_HUMAN	2.25035	1.72233	1.28035	Factor_Treatment_HT1080_13-3L3A-biotin	HT1080_13-biotin	No	lm
HM13	tr|A0A3B3IUB5|A0A3B3IUB5_HUMAN	2.52611	1.71859	1.28035	Factor_Treatment_HT1080_13-3L3A-biotin	HT1080_13-biotin	No	lm
PPP2R1B	sp|P30154|2AAB_HUMAN	3.71583	1.71619	1.28035	Factor_Treatment_HT1080_13-3L3A-biotin	HT1080_13-biotin	No	lm
ATXN10	sp|Q9UBB4|ATX10_HUMAN	3.0368	1.72422	1.28035	Factor_Treatment_HT1080_13-3L3A-biotin	HT1080_13-biotin	No	lm
MSH6	sp|P52701|MSH6_HUMAN	1.72893	1.68027	1.24762	Factor_Treatment_HT1080_13-3L3A-biotin	HT1080_13-biotin	No	lm
AHNAK	sp|Q09666|AHNK_HUMAN	1.22384	1.67562	1.24613	Factor_Treatment_HT1080_13-3L3A-biotin	HT1080_13-biotin	No	lmer
ARL6IP4	sp|Q66PJ3|AR6P4_HUMAN	0.761734	1.66462	1.23827	Factor_Treatment_HT1080_13-3L3A-biotin	HT1080_13-biotin	No	lm
SEC61A1	tr|B4DR61|B4DR61_HUMAN	1.01525	1.65425	1.23409	Factor_Treatment_HT1080_13-3L3A-biotin	HT1080_13-biotin	No	lm
HSPA5	sp|P11021|BIP_HUMAN	1.28593	1.65682	1.23409	Factor_Treatment_HT1080_13-3L3A-biotin	HT1080_13-biotin	No	lmer
PRDX4	sp|Q13162|PRDX4_HUMAN	1.48057	1.6195	1.20546	Factor_Treatment_HT1080_13-3L3A-biotin	HT1080_13-biotin	No	lm
TUBB	sp|P07437|TBB5_HUMAN	1.59299	1.6212	1.20546	Factor_Treatment_HT1080_13-3L3A-biotin	HT1080_13-biotin	No	lmer
CAD	sp|P27708|PYR1_HUMAN	0.850314	1.61491	1.2039	Factor_Treatment_HT1080_13-3L3A-biotin	HT1080_13-biotin	No	lmer
DARS1	sp|P14868|SYDC_HUMAN	1.69932	1.60688	1.19887	Factor_Treatment_HT1080_13-3L3A-biotin	HT1080_13-biotin	No	lm
HSPA9	sp|P38646|GRP75_HUMAN	1.49165	1.60092	1.1959	Factor_Treatment_HT1080_13-3L3A-biotin	HT1080_13-biotin	No	lmer
DLAT	sp|P10515|ODP2_HUMAN	1.23869	1.59742	1.19536	Factor_Treatment_HT1080_13-3L3A-biotin	HT1080_13-biotin	No	lm
RPA3	sp|P35244|RFA3_HUMAN	1.34853	1.56559	1.1694	Factor_Treatment_HT1080_13-3L3A-biotin	HT1080_13-biotin	No	lm
COPA	sp|P53621|COPA_HUMAN	2.55178	1.56598	1.1694	Factor_Treatment_HT1080_13-3L3A-biotin	HT1080_13-biotin	No	lm
HSP90AB1	sp|P08238|HS90B_HUMAN	1.98572	1.55367	1.16579	Factor_Treatment_HT1080_13-3L3A-biotin	HT1080_13-biotin	No	lmer
SLC25A3	sp|Q00325|MPCP_HUMAN	0.900878	1.55332	1.16579	Factor_Treatment_HT1080_13-3L3A-biotin	HT1080_13-biotin	No	lm
PHGDH	sp|O43175|SERA_HUMAN	1.4259	1.55727	1.16579	Factor_Treatment_HT1080_13-3L3A-biotin	HT1080_13-biotin	No	lmer
SMN1	sp|Q16637|SMN_HUMAN	1.08831	1.53831	1.15363	Factor_Treatment_HT1080_13-3L3A-biotin	HT1080_13-biotin	No	lm
PPP6R1	sp|Q9UPN7|PP6R1_HUMAN	1.30437	1.53337	1.15295	Factor_Treatment_HT1080_13-3L3A-biotin	HT1080_13-biotin	No	lm
RPN2	sp|P04844|RPN2_HUMAN	2.08071	1.53199	1.15295	Factor_Treatment_HT1080_13-3L3A-biotin	HT1080_13-biotin	No	lm
IPO5	tr|H0Y8C6|H0Y8C6_HUMAN	2.85621	1.51876	1.14251	Factor_Treatment_HT1080_13-3L3A-biotin	HT1080_13-biotin	No	lm
ITGA3	sp|P26006|ITA3_HUMAN	1.29516	1.47058	1.0971	Factor_Treatment_HT1080_13-3L3A-biotin	HT1080_13-biotin	No	lm
HACD3	sp|Q9P035|HACD3_HUMAN	1.87264	1.46234	1.09163	Factor_Treatment_HT1080_13-3L3A-biotin	HT1080_13-biotin	No	lm
SERPINH1	sp|P50454|SERPH_HUMAN	2.15244	1.44551	1.07753	Factor_Treatment_HT1080_13-3L3A-biotin	HT1080_13-biotin	No	lm
FASN	sp|P49327|FAS_HUMAN	1.95419	1.43429	1.06904	Factor_Treatment_HT1080_13-3L3A-biotin	HT1080_13-biotin	No	lm
FLNB	sp|O75369|FLNB_HUMAN	1.47834	1.42531	1.06276	Factor_Treatment_HT1080_13-3L3A-biotin	HT1080_13-biotin	No	lmer
EPRS1	sp|P07814|SYEP_HUMAN	1.94392	1.41027	1.05857	Factor_Treatment_HT1080_13-3L3A-biotin	HT1080_13-biotin	No	lm
SLC25A5	sp|P05141|ADT2_HUMAN	0.76095	1.40802	1.05857	Factor_Treatment_HT1080_13-3L3A-biotin	HT1080_13-biotin	No	lm
HSP90AA1	sp|P07900|HS90A_HUMAN	1.66803	1.4103	1.05857	Factor_Treatment_HT1080_13-3L3A-biotin	HT1080_13-biotin	No	lmer
SPR	sp|P35270|SPRE_HUMAN	-1.90577	1.40784	1.05857	Factor_Treatment_HT1080_13-3L3A-biotin	HT1080_13-biotin	No	lm
HSP90B1	sp|P14625|ENPL_HUMAN	2.21005	1.4092	1.05857	Factor_Treatment_HT1080_13-3L3A-biotin	HT1080_13-biotin	No	lm
EDC4	sp|Q6P2E9|EDC4_HUMAN	2.51353	1.4023	1.05564	Factor_Treatment_HT1080_13-3L3A-biotin	HT1080_13-biotin	No	lm
CCN1	sp|O00622|CCN1_HUMAN	1.15955	1.38365	1.03959	Factor_Treatment_HT1080_13-3L3A-biotin	HT1080_13-biotin	No	lm
SEC61B	sp|P60468|SC61B_HUMAN	2.21101	1.38064	1.03916	Factor_Treatment_HT1080_13-3L3A-biotin	HT1080_13-biotin	No	lm
SDF4	sp|Q9BRK5|CAB45_HUMAN	1.92684	1.37334	1.03441	Factor_Treatment_HT1080_13-3L3A-biotin	HT1080_13-biotin	No	lm
SELENOK	sp|Q9Y6D0|SELK_HUMAN	2.60507	1.3547	1.01832	Factor_Treatment_HT1080_13-3L3A-biotin	HT1080_13-biotin	No	lm
SERPINE1	sp|P05121|PAI1_HUMAN	1.67284	1.34928	1.01544	Factor_Treatment_HT1080_13-3L3A-biotin	HT1080_13-biotin	No	lm
VAC14	sp|Q08AM6|VAC14_HUMAN	0.912142	1.32999	0.998665	Factor_Treatment_HT1080_13-3L3A-biotin	HT1080_13-biotin	No	lm
C17orf75	sp|Q9HAS0|NJMU_HUMAN	1.55926	1.30338	0.974559	Factor_Treatment_HT1080_13-3L3A-biotin	HT1080_13-biotin	No	lm
RTRAF	sp|Q9Y224|RTRAF_HUMAN	4.84179	1.29655	0.970216	Factor_Treatment_HT1080_13-3L3A-biotin	HT1080_13-biotin	No	lm
RPA2	sp|P15927|RFA2_HUMAN	1.0518	1.2833	0.959439	Factor_Treatment_HT1080_13-3L3A-biotin	HT1080_13-biotin	No	lm
KRAS	sp|P01116|RASK_HUMAN	-2.38006	1.27727	0.955872	Factor_Treatment_HT1080_13-3L3A-biotin	HT1080_13-biotin	No	lm
DNAJA2	sp|O60884|DNJA2_HUMAN	2.01351	1.26052	0.941565	Factor_Treatment_HT1080_13-3L3A-biotin	HT1080_13-biotin	No	lm
RUVBL2	sp|Q9Y230|RUVB2_HUMAN	2.18838	1.24693	0.931657	Factor_Treatment_HT1080_13-3L3A-biotin	HT1080_13-biotin	No	lm
MYL12A	tr|J3QRS3|J3QRS3_HUMAN	1.71298	1.24335	0.931657	Factor_Treatment_HT1080_13-3L3A-biotin	HT1080_13-biotin	No	lm
RBBP7	sp|Q16576|RBBP7_HUMAN	2.37584	1.24393	0.931657	Factor_Treatment_HT1080_13-3L3A-biotin	HT1080_13-biotin	No	lm
CTNNB1	tr|A0A2R8Y5A3|A0A2R8Y5A3_HUMAN	1.45932	1.23291	0.925991	Factor_Treatment_HT1080_13-3L3A-biotin	HT1080_13-biotin	No	lm
RAE1	tr|E9PQ57|E9PQ57_HUMAN	5.09558	1.2338	0.925991	Factor_Treatment_HT1080_13-3L3A-biotin	HT1080_13-biotin	No	lm
SQSTM1	sp|Q13501|SQSTM_HUMAN	1.02036	1.2248	0.920241	Factor_Treatment_HT1080_13-3L3A-biotin	HT1080_13-biotin	No	lm
HNRNPK	sp|P61978|HNRPK_HUMAN	1.90951	1.21347	0.911273	Factor_Treatment_HT1080_13-3L3A-biotin	HT1080_13-biotin	No	lmer
TUBB4B	sp|P68371|TBB4B_HUMAN	1.14205	1.20439	0.904529	Factor_Treatment_HT1080_13-3L3A-biotin	HT1080_13-biotin	No	lmer
ACLY	sp|P53396|ACLY_HUMAN	0.902347	1.19326	0.89573	Factor_Treatment_HT1080_13-3L3A-biotin	HT1080_13-biotin	No	lm
RPS9	sp|P46781|RS9_HUMAN	1.36741	1.17413	0.878913	Factor_Treatment_HT1080_13-3L3A-biotin	HT1080_13-biotin	No	lmer
PSMC3	sp|P17980|PRS6A_HUMAN	1.66606	1.16416	0.872236	Factor_Treatment_HT1080_13-3L3A-biotin	HT1080_13-biotin	No	lm
TUBAL3	sp|A6NHL2|TBAL3_HUMAN	1.35729	1.16286	0.872236	Factor_Treatment_HT1080_13-3L3A-biotin	HT1080_13-biotin	No	lm
GNAI2	sp|P04899|GNAI2_HUMAN	2.11726	1.15824	0.869904	Factor_Treatment_HT1080_13-3L3A-biotin	HT1080_13-biotin	No	lm
ANXA2	sp|P07355|ANXA2_HUMAN	2.47816	1.1545	0.868422	Factor_Treatment_HT1080_13-3L3A-biotin	HT1080_13-biotin	No	lmer
EIF2S1	sp|P05198|IF2A_HUMAN	7.84805	1.13629	0.865767	Factor_Treatment_HT1080_13-3L3A-biotin	HT1080_13-biotin	No	lm
CAPZA1	sp|P52907|CAZA1_HUMAN	2.28862	1.1386	0.865767	Factor_Treatment_HT1080_13-3L3A-biotin	HT1080_13-biotin	No	lm
ATP1A3	tr|A0A0A0MT26|A0A0A0MT26_HUMAN	1.06144	1.14436	0.865767	Factor_Treatment_HT1080_13-3L3A-biotin	HT1080_13-biotin	No	lm
TIMM13	sp|Q9Y5L4|TIM13_HUMAN	3.0566	1.1434	0.865767	Factor_Treatment_HT1080_13-3L3A-biotin	HT1080_13-biotin	No	lm
PAWR	sp|Q96IZ0|PAWR_HUMAN	3.34284	1.13888	0.865767	Factor_Treatment_HT1080_13-3L3A-biotin	HT1080_13-biotin	No	lm
	tr|J3KR12|J3KR12_HUMAN	3.60072	1.1466	0.865767	Factor_Treatment_HT1080_13-3L3A-biotin	HT1080_13-biotin	No	lm
P4HB	sp|P07237|PDIA1_HUMAN	0.627134	1.13689	0.865767	Factor_Treatment_HT1080_13-3L3A-biotin	HT1080_13-biotin	No	lmer
EXOC4	sp|Q96A65|EXOC4_HUMAN	1.71466	1.1219	0.853557	Factor_Treatment_HT1080_13-3L3A-biotin	HT1080_13-biotin	No	lm
RUVBL1	sp|Q9Y265|RUVB1_HUMAN	1.92294	1.10356	0.839227	Factor_Treatment_HT1080_13-3L3A-biotin	HT1080_13-biotin	No	lm
BSG	sp|P35613|BASI_HUMAN	2.00635	1.10325	0.839227	Factor_Treatment_HT1080_13-3L3A-biotin	HT1080_13-biotin	No	lm
YWHAE	sp|P62258|1433E_HUMAN	1.77677	1.09616	0.834287	Factor_Treatment_HT1080_13-3L3A-biotin	HT1080_13-biotin	No	lm
SPTLC1	sp|O15269|SPTC1_HUMAN	0.534665	1.09015	0.830407	Factor_Treatment_HT1080_13-3L3A-biotin	HT1080_13-biotin	No	lm
IMMT	sp|Q16891|MIC60_HUMAN	1.69322	1.06665	0.80903	Factor_Treatment_HT1080_13-3L3A-biotin	HT1080_13-biotin	No	lm
QSOX2	sp|Q6ZRP7|QSOX2_HUMAN	1.8917	1.04462	0.789116	Factor_Treatment_HT1080_13-3L3A-biotin	HT1080_13-biotin	No	lm
TUFM	sp|P49411|EFTU_HUMAN	1.53188	1.02961	0.778302	Factor_Treatment_HT1080_13-3L3A-biotin	HT1080_13-biotin	No	lm
ESYT2	sp|A0FGR8|ESYT2_HUMAN	1.48399	1.03014	0.778302	Factor_Treatment_HT1080_13-3L3A-biotin	HT1080_13-biotin	No	lm
PHB2	sp|Q99623|PHB2_HUMAN	1.41299	1.01917	0.769938	Factor_Treatment_HT1080_13-3L3A-biotin	HT1080_13-biotin	No	lm
S100A6	sp|P06703|S10A6_HUMAN	1.53877	1.00692	0.760409	Factor_Treatment_HT1080_13-3L3A-biotin	HT1080_13-biotin	No	lm
HK2	sp|P52789|HXK2_HUMAN	1.21917	1.0055	0.760409	Factor_Treatment_HT1080_13-3L3A-biotin	HT1080_13-biotin	No	lm
FLNA	sp|P21333|FLNA_HUMAN	1.57066	1.00079	0.757756	Factor_Treatment_HT1080_13-3L3A-biotin	HT1080_13-biotin	No	lmer
IARS1	sp|P41252|SYIC_HUMAN	1.30758	0.993748	0.752753	Factor_Treatment_HT1080_13-3L3A-biotin	HT1080_13-biotin	No	lm
TMPO	sp|P42167|LAP2B_HUMAN	1.91575	0.985201	0.748868	Factor_Treatment_HT1080_13-3L3A-biotin	HT1080_13-biotin	No	lm
RPL21	sp|P46778|RL21_HUMAN	1.24936	0.981783	0.748868	Factor_Treatment_HT1080_13-3L3A-biotin	HT1080_13-biotin	No	lm
YBX1	tr|H0Y449|H0Y449_HUMAN	0.989929	0.987408	0.748868	Factor_Treatment_HT1080_13-3L3A-biotin	HT1080_13-biotin	No	lm
TPM1	tr|Q6ZN40|Q6ZN40_HUMAN	1.36258	0.983387	0.748868	Factor_Treatment_HT1080_13-3L3A-biotin	HT1080_13-biotin	No	lmer
ESYT1	sp|Q9BSJ8|ESYT1_HUMAN	2.03642	0.978319	0.74886	Factor_Treatment_HT1080_13-3L3A-biotin	HT1080_13-biotin	No	lm
DIABLO	sp|Q9NR28|DBLOH_HUMAN	2.35673	0.977789	0.74886	Factor_Treatment_HT1080_13-3L3A-biotin	HT1080_13-biotin	No	lm
DSTN	sp|P60981|DEST_HUMAN	2.62446	0.968559	0.741607	Factor_Treatment_HT1080_13-3L3A-biotin	HT1080_13-biotin	No	lm
ERLIN1	sp|O75477|ERLN1_HUMAN	1.07138	0.963379	0.740358	Factor_Treatment_HT1080_13-3L3A-biotin	HT1080_13-biotin	No	lm
TMOD3	sp|Q9NYL9|TMOD3_HUMAN	1.77146	0.965139	0.740358	Factor_Treatment_HT1080_13-3L3A-biotin	HT1080_13-biotin	No	lm
GOLGA3	sp|Q08378|GOGA3_HUMAN	0.462837	0.951038	0.729969	Factor_Treatment_HT1080_13-3L3A-biotin	HT1080_13-biotin	No	lm
RAN	tr|J3KQE5|J3KQE5_HUMAN	1.16157	0.939993	0.720868	Factor_Treatment_HT1080_13-3L3A-biotin	HT1080_13-biotin	No	lm
PPP6C	sp|O00743|PPP6_HUMAN	1.33759	0.927736	0.710544	Factor_Treatment_HT1080_13-3L3A-biotin	HT1080_13-biotin	No	lm
RPS4X	sp|P62701|RS4X_HUMAN	0.950278	0.91518	0.699915	Factor_Treatment_HT1080_13-3L3A-biotin	HT1080_13-biotin	No	lm
ECH1	sp|Q13011|ECH1_HUMAN	-1.41576	0.900803	0.68775	Factor_Treatment_HT1080_13-3L3A-biotin	HT1080_13-biotin	No	lm
NUP214	sp|P35658|NU214_HUMAN	0.424491	0.899189	0.68775	Factor_Treatment_HT1080_13-3L3A-biotin	HT1080_13-biotin	No	lm
IGF2R	sp|P11717|MPRI_HUMAN	1.8184	0.890447	0.680909	Factor_Treatment_HT1080_13-3L3A-biotin	HT1080_13-biotin	No	lm
TBC1D9B	sp|Q66K14|TBC9B_HUMAN	1.89908	0.882969	0.677207	Factor_Treatment_HT1080_13-3L3A-biotin	HT1080_13-biotin	No	lm
LSM14A	sp|Q8ND56|LS14A_HUMAN	1.09203	0.883538	0.677207	Factor_Treatment_HT1080_13-3L3A-biotin	HT1080_13-biotin	No	lm
FKBP8	sp|Q14318|FKBP8_HUMAN	1.65726	0.878493	0.676036	Factor_Treatment_HT1080_13-3L3A-biotin	HT1080_13-biotin	No	lm
AHSA1	sp|O95433|AHSA1_HUMAN	1.31315	0.878054	0.676036	Factor_Treatment_HT1080_13-3L3A-biotin	HT1080_13-biotin	No	lm
RPS16	sp|P62249|RS16_HUMAN	0.470249	0.876003	0.675845	Factor_Treatment_HT1080_13-3L3A-biotin	HT1080_13-biotin	No	lm
AKAP8L	sp|Q9ULX6|AKP8L_HUMAN	1.07346	0.835291	0.636985	Factor_Treatment_HT1080_13-3L3A-biotin	HT1080_13-biotin	No	lm
CORO1C	sp|Q9ULV4|COR1C_HUMAN	2.0104	0.83133	0.634868	Factor_Treatment_HT1080_13-3L3A-biotin	HT1080_13-biotin	No	lm
ATP5F1A	sp|P25705|ATPA_HUMAN	0.90614	0.821074	0.626448	Factor_Treatment_HT1080_13-3L3A-biotin	HT1080_13-biotin	No	lmer
HNRNPF	sp|P52597|HNRPF_HUMAN	1.81023	0.813724	0.620927	Factor_Treatment_HT1080_13-3L3A-biotin	HT1080_13-biotin	No	lm
SEPTIN9	sp|Q9UHD8|SEPT9_HUMAN	1.99641	0.792301	0.601325	Factor_Treatment_HT1080_13-3L3A-biotin	HT1080_13-biotin	No	lm
CSNK1A1	tr|A0A590UJ43|A0A590UJ43_HUMAN	1.12355	0.786085	0.596922	Factor_Treatment_HT1080_13-3L3A-biotin	HT1080_13-biotin	No	lm
MPRIP	tr|A0A494BZV2|A0A494BZV2_HUMAN	1.95141	0.777969	0.590612	Factor_Treatment_HT1080_13-3L3A-biotin	HT1080_13-biotin	No	lmer
CFL1	tr|E9PK25|E9PK25_HUMAN	2.6063	0.772277	0.58695	Factor_Treatment_HT1080_13-3L3A-biotin	HT1080_13-biotin	No	lm
RPS11	sp|P62280|RS11_HUMAN	1.03877	0.770717	0.58695	Factor_Treatment_HT1080_13-3L3A-biotin	HT1080_13-biotin	No	lmer
RPL12	sp|P30050|RL12_HUMAN	0.946032	0.764403	0.582419	Factor_Treatment_HT1080_13-3L3A-biotin	HT1080_13-biotin	No	lm
SELENOO	sp|Q9BVL4|SELO_HUMAN	1.00292	0.759794	0.579586	Factor_Treatment_HT1080_13-3L3A-biotin	HT1080_13-biotin	No	lm
	tr|F5H423|F5H423_HUMAN	1.65246	0.748865	0.570426	Factor_Treatment_HT1080_13-3L3A-biotin	HT1080_13-biotin	No	lm
YWHAQ	sp|P27348|1433T_HUMAN	5.17622	0.731266	0.559832	Factor_Treatment_HT1080_13-3L3A-biotin	HT1080_13-biotin	No	lm
RPLP0	sp|P05388|RLA0_HUMAN	1.74757	0.732663	0.559832	Factor_Treatment_HT1080_13-3L3A-biotin	HT1080_13-biotin	No	lmer
EFEMP1	sp|Q12805|FBLN3_HUMAN	4.01914	0.73592	0.559832	Factor_Treatment_HT1080_13-3L3A-biotin	HT1080_13-biotin	No	lm
RPL24	sp|P83731|RL24_HUMAN	1.09745	0.732389	0.559832	Factor_Treatment_HT1080_13-3L3A-biotin	HT1080_13-biotin	No	lm
VDAC2	sp|P45880|VDAC2_HUMAN	1.41605	0.727512	0.559815	Factor_Treatment_HT1080_13-3L3A-biotin	HT1080_13-biotin	No	lmer
DNAJA1	sp|P31689|DNJA1_HUMAN	0.650226	0.726069	0.559815	Factor_Treatment_HT1080_13-3L3A-biotin	HT1080_13-biotin	No	lm
CALM2	tr|E7EMB3|E7EMB3_HUMAN	1.38445	0.726697	0.559815	Factor_Treatment_HT1080_13-3L3A-biotin	HT1080_13-biotin	No	lm
STT3A	sp|P46977|STT3A_HUMAN	0.923448	0.721859	0.557319	Factor_Treatment_HT1080_13-3L3A-biotin	HT1080_13-biotin	No	lm
TPM4	sp|P67936|TPM4_HUMAN	1.98955	0.716678	0.555544	Factor_Treatment_HT1080_13-3L3A-biotin	HT1080_13-biotin	No	lm
MTOR	sp|P42345|MTOR_HUMAN	1.22323	0.716837	0.555544	Factor_Treatment_HT1080_13-3L3A-biotin	HT1080_13-biotin	No	lm
RACK1	tr|D6REE5|D6REE5_HUMAN	-1.29878	0.713503	0.554062	Factor_Treatment_HT1080_13-3L3A-biotin	HT1080_13-biotin	No	lm
PCNT	sp|O95613|PCNT_HUMAN	-0.380208	0.706305	0.548551	Factor_Treatment_HT1080_13-3L3A-biotin	HT1080_13-biotin	No	lm
SLC25A4	sp|P12235|ADT1_HUMAN	-0.493899	0.696908	0.540834	Factor_Treatment_HT1080_13-3L3A-biotin	HT1080_13-biotin	No	lm
RPS3	sp|P23396|RS3_HUMAN	1.02732	0.692644	0.539911	Factor_Treatment_HT1080_13-3L3A-biotin	HT1080_13-biotin	No	lmer
RAI14	sp|Q9P0K7|RAI14_HUMAN	1.96557	0.693744	0.539911	Factor_Treatment_HT1080_13-3L3A-biotin	HT1080_13-biotin	No	lmer
H2AX	sp|P16104|H2AX_HUMAN	1.07371	0.69013	0.539057	Factor_Treatment_HT1080_13-3L3A-biotin	HT1080_13-biotin	No	lm
RICTOR	sp|Q6R327|RICTR_HUMAN	0.87121	0.677802	0.528384	Factor_Treatment_HT1080_13-3L3A-biotin	HT1080_13-biotin	No	lm
FAM83H	tr|A0A494C1T9|A0A494C1T9_HUMAN	1.41515	0.667578	0.521044	Factor_Treatment_HT1080_13-3L3A-biotin	HT1080_13-biotin	No	lmer
RPS7	sp|P62081|RS7_HUMAN	1.77152	0.667172	0.521044	Factor_Treatment_HT1080_13-3L3A-biotin	HT1080_13-biotin	No	lm
ACACB	sp|O00763|ACACB_HUMAN	-0.295548	0.664754	0.520262	Factor_Treatment_HT1080_13-3L3A-biotin	HT1080_13-biotin	No	lmer
ESRP1	sp|Q6NXG1|ESRP1_HUMAN	1.0537	0.657268	0.514405	Factor_Treatment_HT1080_13-3L3A-biotin	HT1080_13-biotin	No	lm
RPL17-C18orf32	tr|A0A0A6YYL6|A0A0A6YYL6_HUMAN	1.49915	0.652083	0.51174	Factor_Treatment_HT1080_13-3L3A-biotin	HT1080_13-biotin	No	lm
LIMA1	sp|Q9UHB6|LIMA1_HUMAN	2.01005	0.651361	0.51174	Factor_Treatment_HT1080_13-3L3A-biotin	HT1080_13-biotin	No	lm
RPL37	sp|P61927|RL37_HUMAN	1.23129	0.647505	0.509495	Factor_Treatment_HT1080_13-3L3A-biotin	HT1080_13-biotin	No	lm
CAPZB	tr|B1AK88|B1AK88_HUMAN	1.36112	0.640703	0.504299	Factor_Treatment_HT1080_13-3L3A-biotin	HT1080_13-biotin	No	lm
RPS23	sp|P62266|RS23_HUMAN	0.946725	0.636945	0.50214	Factor_Treatment_HT1080_13-3L3A-biotin	HT1080_13-biotin	No	lm
MYO1C	sp|O00159|MYO1C_HUMAN	1.31855	0.633776	0.500736	Factor_Treatment_HT1080_13-3L3A-biotin	HT1080_13-biotin	No	lmer
RHEB	sp|Q15382|RHEB_HUMAN	1.44874	0.632359	0.500736	Factor_Treatment_HT1080_13-3L3A-biotin	HT1080_13-biotin	No	lm
RPL18A	sp|Q02543|RL18A_HUMAN	1.50712	0.620655	0.490613	Factor_Treatment_HT1080_13-3L3A-biotin	HT1080_13-biotin	No	lm
H4C1	sp|P62805|H4_HUMAN	1.30645	0.613737	0.485272	Factor_Treatment_HT1080_13-3L3A-biotin	HT1080_13-biotin	No	lm
FXR1	sp|P51114|FXR1_HUMAN	1.583	0.611426	0.484531	Factor_Treatment_HT1080_13-3L3A-biotin	HT1080_13-biotin	No	lm
YWHAZ	sp|P63104|1433Z_HUMAN	1.43928	0.607982	0.482653	Factor_Treatment_HT1080_13-3L3A-biotin	HT1080_13-biotin	No	lm
NME1-NME2	tr|Q32Q12|Q32Q12_HUMAN	0.921727	0.594818	0.471048	Factor_Treatment_HT1080_13-3L3A-biotin	HT1080_13-biotin	No	lm
BIRC2	sp|Q13490|BIRC2_HUMAN	4.97984	0.590939	0.468723	Factor_Treatment_HT1080_13-3L3A-biotin	HT1080_13-biotin	No	lm
PKM	sp|P14618|KPYM_HUMAN	1.74872	0.587322	0.466654	Factor_Treatment_HT1080_13-3L3A-biotin	HT1080_13-biotin	No	lm
NUP62	sp|P37198|NUP62_HUMAN	0.573077	0.564743	0.445619	Factor_Treatment_HT1080_13-3L3A-biotin	HT1080_13-biotin	No	lm
PKP2	sp|Q99959|PKP2_HUMAN	1.7999	0.555329	0.437741	Factor_Treatment_HT1080_13-3L3A-biotin	HT1080_13-biotin	No	lm
RPL31	sp|P62899|RL31_HUMAN	1.46331	0.549401	0.433345	Factor_Treatment_HT1080_13-3L3A-biotin	HT1080_13-biotin	No	lm
LDHB	tr|A0A5F9ZHM4|A0A5F9ZHM4_HUMAN	1.02812	0.547673	0.433144	Factor_Treatment_HT1080_13-3L3A-biotin	HT1080_13-biotin	No	lm
LGALS1	sp|P09382|LEG1_HUMAN	1.65838	0.542567	0.431075	Factor_Treatment_HT1080_13-3L3A-biotin	HT1080_13-biotin	No	lm
EMD	sp|P50402|EMD_HUMAN	0.869951	0.54337	0.431075	Factor_Treatment_HT1080_13-3L3A-biotin	HT1080_13-biotin	No	lm
CAVIN1	sp|Q6NZI2|CAVN1_HUMAN	1.96321	0.537584	0.427603	Factor_Treatment_HT1080_13-3L3A-biotin	HT1080_13-biotin	No	lm
FAU	tr|E9PR30|E9PR30_HUMAN	-0.849194	0.529518	0.421042	Factor_Treatment_HT1080_13-3L3A-biotin	HT1080_13-biotin	No	lm
MSH2	tr|A0A2R8YG02|A0A2R8YG02_HUMAN	2.96735	0.526198	0.419222	Factor_Treatment_HT1080_13-3L3A-biotin	HT1080_13-biotin	No	lm
RPL11	sp|P62913|RL11_HUMAN	1.61744	0.497626	0.392145	Factor_Treatment_HT1080_13-3L3A-biotin	HT1080_13-biotin	No	lm
LARP1	sp|Q6PKG0|LARP1_HUMAN	1.08829	0.49502	0.391029	Factor_Treatment_HT1080_13-3L3A-biotin	HT1080_13-biotin	No	lm
VCP	sp|P55072|TERA_HUMAN	1.04108	0.487731	0.385225	Factor_Treatment_HT1080_13-3L3A-biotin	HT1080_13-biotin	No	lm
DBT	sp|P11182|ODB2_HUMAN	0.519043	0.486197	0.38517	Factor_Treatment_HT1080_13-3L3A-biotin	HT1080_13-biotin	No	lm
ICAM1	sp|P05362|ICAM1_HUMAN	1.10113	0.468226	0.372957	Factor_Treatment_HT1080_13-3L3A-biotin	HT1080_13-biotin	No	lm
RPL13A	tr|M0QYS1|M0QYS1_HUMAN	-0.537098	0.468702	0.372957	Factor_Treatment_HT1080_13-3L3A-biotin	HT1080_13-biotin	No	lm
RPL3	sp|P39023|RL3_HUMAN	1.32099	0.467885	0.372957	Factor_Treatment_HT1080_13-3L3A-biotin	HT1080_13-biotin	No	lm
RPL23	sp|P62829|RL23_HUMAN	0.681298	0.46666	0.372957	Factor_Treatment_HT1080_13-3L3A-biotin	HT1080_13-biotin	No	lm
RPL36A	tr|J3KQN4|J3KQN4_HUMAN	0.82146	0.4702	0.372957	Factor_Treatment_HT1080_13-3L3A-biotin	HT1080_13-biotin	No	lm
LUC7L2	tr|A0A0A6YYJ8|A0A0A6YYJ8_HUMAN	0.589516	0.456737	0.364484	Factor_Treatment_HT1080_13-3L3A-biotin	HT1080_13-biotin	No	lm
NCL	sp|P19338|NUCL_HUMAN	1.58785	0.451096	0.361643	Factor_Treatment_HT1080_13-3L3A-biotin	HT1080_13-biotin	No	lm
MYO1B	sp|O43795|MYO1B_HUMAN	1.38974	0.45101	0.361643	Factor_Treatment_HT1080_13-3L3A-biotin	HT1080_13-biotin	No	lmer
RPS14	sp|P62263|RS14_HUMAN	1.33934	0.442011	0.35408	Factor_Treatment_HT1080_13-3L3A-biotin	HT1080_13-biotin	No	lm
SFPQ	sp|P23246|SFPQ_HUMAN	1.50901	0.44012	0.353619	Factor_Treatment_HT1080_13-3L3A-biotin	HT1080_13-biotin	No	lm
BANF1	sp|O75531|BAF_HUMAN	0.527087	0.429682	0.344608	Factor_Treatment_HT1080_13-3L3A-biotin	HT1080_13-biotin	No	lm
HNRNPM	sp|P52272|HNRPM_HUMAN	0.90403	0.426703	0.34346	Factor_Treatment_HT1080_13-3L3A-biotin	HT1080_13-biotin	No	lm
RPLP2	sp|P05387|RLA2_HUMAN	3.21494	0.425695	0.34346	Factor_Treatment_HT1080_13-3L3A-biotin	HT1080_13-biotin	No	lm
PTBP1	tr|A0A0U1RRM4|A0A0U1RRM4_HUMAN	1.09372	0.412986	0.332163	Factor_Treatment_HT1080_13-3L3A-biotin	HT1080_13-biotin	No	lm
RPS18	sp|P62269|RS18_HUMAN	1.41811	0.398362	0.321748	Factor_Treatment_HT1080_13-3L3A-biotin	HT1080_13-biotin	No	lm
RPL4	sp|P36578|RL4_HUMAN	0.990358	0.399975	0.321748	Factor_Treatment_HT1080_13-3L3A-biotin	HT1080_13-biotin	No	lm
PGAM5	sp|Q96HS1|PGAM5_HUMAN	0.390172	0.398401	0.321748	Factor_Treatment_HT1080_13-3L3A-biotin	HT1080_13-biotin	No	lm
GAPDH	sp|P04406|G3P_HUMAN	4.29081	0.388369	0.31315	Factor_Treatment_HT1080_13-3L3A-biotin	HT1080_13-biotin	No	lm
RPS26P11	sp|Q5JNZ5|RS26L_HUMAN	0.465966	0.382629	0.3088	Factor_Treatment_HT1080_13-3L3A-biotin	HT1080_13-biotin	No	lm
CAPRIN1	sp|Q14444|CAPR1_HUMAN	2.26285	0.378036	0.305592	Factor_Treatment_HT1080_13-3L3A-biotin	HT1080_13-biotin	No	lm
TRIP13	sp|Q15645|PCH2_HUMAN	0.49398	0.370124	0.299061	Factor_Treatment_HT1080_13-3L3A-biotin	HT1080_13-biotin	No	lmer
CD59	sp|P13987|CD59_HUMAN	1.28395	0.368037	0.29835	Factor_Treatment_HT1080_13-3L3A-biotin	HT1080_13-biotin	No	lm
PLEC	sp|Q15149|PLEC_HUMAN	0.841619	0.36417	0.295855	Factor_Treatment_HT1080_13-3L3A-biotin	HT1080_13-biotin	No	lmer
CLTC	tr|A0A087WVQ6|A0A087WVQ6_HUMAN	1.18838	0.35101	0.284063	Factor_Treatment_HT1080_13-3L3A-biotin	HT1080_13-biotin	No	lmer
RTN4	sp|Q9NQC3|RTN4_HUMAN	0.873236	0.345195	0.279611	Factor_Treatment_HT1080_13-3L3A-biotin	HT1080_13-biotin	No	lm
LMNA	sp|P02545|LMNA_HUMAN	0.715883	0.34096	0.276736	Factor_Treatment_HT1080_13-3L3A-biotin	HT1080_13-biotin	No	lmer
ABCB6	sp|Q9NP58|ABCB6_HUMAN	0.947263	0.327511	0.268276	Factor_Treatment_HT1080_13-3L3A-biotin	HT1080_13-biotin	No	lm
RPL10A	sp|P62906|RL10A_HUMAN	1.17208	0.329919	0.268276	Factor_Treatment_HT1080_13-3L3A-biotin	HT1080_13-biotin	No	lm
RPL22	sp|P35268|RL22_HUMAN	-0.635213	0.327105	0.268276	Factor_Treatment_HT1080_13-3L3A-biotin	HT1080_13-biotin	No	lm
UBC	sp|P0CG48|UBC_HUMAN	0.74294	0.329126	0.268276	Factor_Treatment_HT1080_13-3L3A-biotin	HT1080_13-biotin	No	lm
RPL7A	sp|P62424|RL7A_HUMAN	1.07347	0.315848	0.258357	Factor_Treatment_HT1080_13-3L3A-biotin	HT1080_13-biotin	No	lm
NUP88	sp|Q99567|NUP88_HUMAN	0.887377	0.31266	0.256504	Factor_Treatment_HT1080_13-3L3A-biotin	HT1080_13-biotin	No	lm
RPL7	sp|P18124|RL7_HUMAN	1.25636	0.310131	0.255305	Factor_Treatment_HT1080_13-3L3A-biotin	HT1080_13-biotin	No	lm
MYEF2	tr|A0A0A0MR39|A0A0A0MR39_HUMAN	0.186113	0.293856	0.240356	Factor_Treatment_HT1080_13-3L3A-biotin	HT1080_13-biotin	No	lm
TMPO	sp|P42166|LAP2A_HUMAN	0.94842	0.29158	0.239402	Factor_Treatment_HT1080_13-3L3A-biotin	HT1080_13-biotin	No	lmer
RPS2	sp|P15880|RS2_HUMAN	1.03078	0.286997	0.236137	Factor_Treatment_HT1080_13-3L3A-biotin	HT1080_13-biotin	No	lm
ILF2	sp|Q12905|ILF2_HUMAN	-0.718221	0.284911	0.236125	Factor_Treatment_HT1080_13-3L3A-biotin	HT1080_13-biotin	No	lm
RPS5	sp|P46782|RS5_HUMAN	2.50261	0.284361	0.236125	Factor_Treatment_HT1080_13-3L3A-biotin	HT1080_13-biotin	No	lm
ARL1	tr|F8VYN9|F8VYN9_HUMAN	-1.25597	0.274549	0.227619	Factor_Treatment_HT1080_13-3L3A-biotin	HT1080_13-biotin	No	lm
VIM	sp|P08670|VIME_HUMAN	0.615448	0.26766	0.222032	Factor_Treatment_HT1080_13-3L3A-biotin	HT1080_13-biotin	No	lmer
SUB1	sp|P53999|TCP4_HUMAN	0.915629	0.259478	0.215149	Factor_Treatment_HT1080_13-3L3A-biotin	HT1080_13-biotin	No	lm
DHCR24	tr|A0A0A0MTI1|A0A0A0MTI1_HUMAN	0.309988	0.250466	0.207431	Factor_Treatment_HT1080_13-3L3A-biotin	HT1080_13-biotin	No	lm
RPL13	sp|P26373|RL13_HUMAN	0.756624	0.241712	0.200679	Factor_Treatment_HT1080_13-3L3A-biotin	HT1080_13-biotin	No	lm
RPA1	sp|P27694|RFA1_HUMAN	0.900721	0.241137	0.200679	Factor_Treatment_HT1080_13-3L3A-biotin	HT1080_13-biotin	No	lmer
PABPC1	sp|P11940|PABP1_HUMAN	0.536091	0.233366	0.194192	Factor_Treatment_HT1080_13-3L3A-biotin	HT1080_13-biotin	No	lm
H3-3B	tr|K7ES00|K7ES00_HUMAN	0.265153	0.228493	0.190598	Factor_Treatment_HT1080_13-3L3A-biotin	HT1080_13-biotin	No	lm
RPL23A	tr|A8MUS3|A8MUS3_HUMAN	0.668918	0.221401	0.184781	Factor_Treatment_HT1080_13-3L3A-biotin	HT1080_13-biotin	No	lm
BAG2	sp|O95816|BAG2_HUMAN	0.199518	0.219827	0.18448	Factor_Treatment_HT1080_13-3L3A-biotin	HT1080_13-biotin	No	lm
MYL6	tr|B7Z6Z4|B7Z6Z4_HUMAN	0.50269	0.216558	0.182478	Factor_Treatment_HT1080_13-3L3A-biotin	HT1080_13-biotin	No	lm
CLTA	sp|P09496|CLCA_HUMAN	2.23104	0.209301	0.176486	Factor_Treatment_HT1080_13-3L3A-biotin	HT1080_13-biotin	No	lm
RPL30	sp|P62888|RL30_HUMAN	1.10325	0.203234	0.171679	Factor_Treatment_HT1080_13-3L3A-biotin	HT1080_13-biotin	No	lm
CLTB	sp|P09497|CLCB_HUMAN	0.857287	0.198236	0.167938	Factor_Treatment_HT1080_13-3L3A-biotin	HT1080_13-biotin	No	lmer
PCM1	sp|Q15154|PCM1_HUMAN	-0.445821	0.195309	0.166264	Factor_Treatment_HT1080_13-3L3A-biotin	HT1080_13-biotin	No	lm
PKP3	sp|Q9Y446|PKP3_HUMAN	1.59252	0.18878	0.160985	Factor_Treatment_HT1080_13-3L3A-biotin	HT1080_13-biotin	No	lm
RPLP1	sp|P05386|RLA1_HUMAN	0.737577	0.184275	0.157726	Factor_Treatment_HT1080_13-3L3A-biotin	HT1080_13-biotin	No	lm
COL17A1	sp|Q9UMD9|COHA1_HUMAN	-1.95904	0.166733	0.141427	Factor_Treatment_HT1080_13-3L3A-biotin	HT1080_13-biotin	No	lm
TNFAIP2	sp|Q03169|TNAP2_HUMAN	0.363298	0.161847	0.13926	Factor_Treatment_HT1080_13-3L3A-biotin	HT1080_13-biotin	No	lm
GNB2	sp|P62879|GBB2_HUMAN	0.900277	0.16248	0.13926	Factor_Treatment_HT1080_13-3L3A-biotin	HT1080_13-biotin	No	lm
RPS13	sp|P62277|RS13_HUMAN	0.922699	0.160859	0.13926	Factor_Treatment_HT1080_13-3L3A-biotin	HT1080_13-biotin	No	lm
RPS8	sp|P62241|RS8_HUMAN	0.556674	0.157628	0.137257	Factor_Treatment_HT1080_13-3L3A-biotin	HT1080_13-biotin	No	lm
SEC16A	sp|O15027|SC16A_HUMAN	0.607797	0.153894	0.134749	Factor_Treatment_HT1080_13-3L3A-biotin	HT1080_13-biotin	No	lm
RBM14	sp|Q96PK6|RBM14_HUMAN	0.384267	0.127562	0.109638	Factor_Treatment_HT1080_13-3L3A-biotin	HT1080_13-biotin	No	lm
RPS3A	sp|P61247|RS3A_HUMAN	0.564524	0.120625	0.10392	Factor_Treatment_HT1080_13-3L3A-biotin	HT1080_13-biotin	No	lm
TPM1	tr|B7Z596|B7Z596_HUMAN	0.458812	0.118968	0.103477	Factor_Treatment_HT1080_13-3L3A-biotin	HT1080_13-biotin	No	lm
RPL6	sp|Q02878|RL6_HUMAN	0.338519	0.11178	0.0976145	Factor_Treatment_HT1080_13-3L3A-biotin	HT1080_13-biotin	No	lmer
	tr|A0A0U1RRH7|A0A0U1RRH7_HUMAN	-0.6104	0.110686	0.0976145	Factor_Treatment_HT1080_13-3L3A-biotin	HT1080_13-biotin	No	lm
HNRNPA2B1	sp|P22626|ROA2_HUMAN	-0.287979	0.0940634	0.0821967	Factor_Treatment_HT1080_13-3L3A-biotin	HT1080_13-biotin	No	lm
MARCKS	sp|P29966|MARCS_HUMAN	0.549245	0.0911183	0.0804529	Factor_Treatment_HT1080_13-3L3A-biotin	HT1080_13-biotin	No	lm
NXN	sp|Q6DKJ4|NXN_HUMAN	0.447292	0.076954	0.0677122	Factor_Treatment_HT1080_13-3L3A-biotin	HT1080_13-biotin	No	lm
CAV1	sp|Q03135|CAV1_HUMAN	0.956176	0.0759847	0.0677122	Factor_Treatment_HT1080_13-3L3A-biotin	HT1080_13-biotin	No	lm
LRRC59	sp|Q96AG4|LRC59_HUMAN	0.200996	0.0687839	0.0617028	Factor_Treatment_HT1080_13-3L3A-biotin	HT1080_13-biotin	No	lm
RPL38	sp|P63173|RL38_HUMAN	-0.146626	0.0406704	0.0347776	Factor_Treatment_HT1080_13-3L3A-biotin	HT1080_13-biotin	No	lm
TMX1	sp|Q9H3N1|TMX1_HUMAN	-0.0732605	0.019901	0.0151932	Factor_Treatment_HT1080_13-3L3A-biotin	HT1080_13-biotin	No	lm
RPL14	sp|P50914|RL14_HUMAN	-0.0816126	0.0105045	0.00697841	Factor_Treatment_HT1080_13-3L3A-biotin	HT1080_13-biotin	No	lm
RPL27A	sp|P46776|RL27A_HUMAN	0.0328454	0.00919263	0.00684509	Factor_Treatment_HT1080_13-3L3A-biotin	HT1080_13-biotin	No	lm
RBM39	sp|Q14498|RBM39_HUMAN	0.00920818	0.00627964	0.00510745	Factor_Treatment_HT1080_13-3L3A-biotin	HT1080_13-biotin	No	lm
ELAVL1	sp|Q15717|ELAV1_HUMAN	0.0144792	0.00213233	0.00213233	Factor_Treatment_HT1080_13-3L3A-biotin	HT1080_13-biotin	No	lm

## Sheet: HT1080 DMSO vs. 13-bio
Gene	Protein	Est_Fc	Pval	Qval	Reference_condition	Comparision_condition	Is_outlier	modelFit
PRKDC	sp|P78527|PRKDC_HUMAN	2.94176	10.8643	8.29491	Factor_Treatment_HT1080_DMSO_control	HT1080_13-biotin	No	lmer
ATP2A2	sp|P16615|AT2A2_HUMAN	3.00174	9.42305	7.15471	Factor_Treatment_HT1080_DMSO_control	HT1080_13-biotin	No	lmer
P4HB	sp|P07237|PDIA1_HUMAN	3.39276	9.09655	7.0043	Factor_Treatment_HT1080_DMSO_control	HT1080_13-biotin	No	lmer
SLC16A3	sp|O15427|MOT4_HUMAN	2.24498	8.14378	6.17647	Factor_Treatment_HT1080_DMSO_control	HT1080_13-biotin	No	lm
TUBA1C	tr|F5H5D3|F5H5D3_HUMAN	2.40328	7.89941	6.029	Factor_Treatment_HT1080_DMSO_control	HT1080_13-biotin	No	lmer
UGGT1	sp|Q9NYU2|UGGG1_HUMAN	3.00851	7.00549	5.21427	Factor_Treatment_HT1080_DMSO_control	HT1080_13-biotin	No	lmer
MYH9	sp|P35579|MYH9_HUMAN	2.53594	6.92274	5.19846	Factor_Treatment_HT1080_DMSO_control	HT1080_13-biotin	No	lmer
AIFM1	sp|O95831|AIFM1_HUMAN	2.59604	5.45818	3.7919	Factor_Treatment_HT1080_DMSO_control	HT1080_13-biotin	No	lm
TUBB2A	sp|Q13885|TBB2A_HUMAN	1.79382	5.20679	3.59166	Factor_Treatment_HT1080_DMSO_control	HT1080_13-biotin	No	lmer
TUBB6	sp|Q9BUF5|TBB6_HUMAN	2.17024	4.85636	3.28698	Factor_Treatment_HT1080_DMSO_control	HT1080_13-biotin	No	lmer
GLRX3	sp|O76003|GLRX3_HUMAN	3.24061	4.68011	3.15213	Factor_Treatment_HT1080_DMSO_control	HT1080_13-biotin	No	lmer
COPB1	sp|P53618|COPB_HUMAN	2.99226	4.28757	2.79737	Factor_Treatment_HT1080_DMSO_control	HT1080_13-biotin	No	lm
CAD	sp|P27708|PYR1_HUMAN	2.19228	4.04019	2.58476	Factor_Treatment_HT1080_DMSO_control	HT1080_13-biotin	No	lmer
ALG1	sp|Q9BT22|ALG1_HUMAN	6.06234	3.92008	2.49684	Factor_Treatment_HT1080_DMSO_control	HT1080_13-biotin	No	lm
HSPA5	sp|P11021|BIP_HUMAN	2.45254	3.82212	2.42884	Factor_Treatment_HT1080_DMSO_control	HT1080_13-biotin	No	lmer
BZW1	sp|Q7L1Q6|BZW1_HUMAN	3.90343	3.63724	2.27199	Factor_Treatment_HT1080_DMSO_control	HT1080_13-biotin	No	lm
AHNAK	sp|Q09666|AHNK_HUMAN	2.19265	3.52537	2.18645	Factor_Treatment_HT1080_DMSO_control	HT1080_13-biotin	No	lmer
SELENOF	sp|O60613|SEP15_HUMAN	2.08837	3.48727	2.17387	Factor_Treatment_HT1080_DMSO_control	HT1080_13-biotin	No	lm
ASPH	sp|Q12797|ASPH_HUMAN	2.5525	3.46449	2.17387	Factor_Treatment_HT1080_DMSO_control	HT1080_13-biotin	No	lmer
GCN1	sp|Q92616|GCN1_HUMAN	3.38442	3.40935	2.141	Factor_Treatment_HT1080_DMSO_control	HT1080_13-biotin	No	lmer
SLC7A5	sp|Q01650|LAT1_HUMAN	1.70121	3.2363	1.98915	Factor_Treatment_HT1080_DMSO_control	HT1080_13-biotin	No	lmer
ACLY	sp|P53396|ACLY_HUMAN	7.6823	3.14706	1.92011	Factor_Treatment_HT1080_DMSO_control	HT1080_13-biotin	No	lm
HSPA8	sp|P11142|HSP7C_HUMAN	1.54558	3.11009	1.90244	Factor_Treatment_HT1080_DMSO_control	HT1080_13-biotin	No	lmer
EP400	sp|Q96L91|EP400_HUMAN	1.09307	3.05322	1.86405	Factor_Treatment_HT1080_DMSO_control	HT1080_13-biotin	No	lm
SSBP1	sp|Q04837|SSBP_HUMAN	3.44261	3.02352	1.85209	Factor_Treatment_HT1080_DMSO_control	HT1080_13-biotin	No	lm
KPNB1	sp|Q14974|IMB1_HUMAN	3.21025	2.95312	1.80737	Factor_Treatment_HT1080_DMSO_control	HT1080_13-biotin	No	lmer
TXN	sp|P10599|THIO_HUMAN	3.61955	2.94538	1.80737	Factor_Treatment_HT1080_DMSO_control	HT1080_13-biotin	No	lm
CALU	sp|O43852|CALU_HUMAN	1.92195	2.77416	1.65195	Factor_Treatment_HT1080_DMSO_control	HT1080_13-biotin	No	lmer
RCN1	sp|Q15293|RCN1_HUMAN	3.71064	2.72872	1.65071	Factor_Treatment_HT1080_DMSO_control	HT1080_13-biotin	No	lm
ELOVL1	sp|Q9BW60|ELOV1_HUMAN	1.57192	2.73555	1.65071	Factor_Treatment_HT1080_DMSO_control	HT1080_13-biotin	No	lm
MAP1B	sp|P46821|MAP1B_HUMAN	2.35027	2.73873	1.65071	Factor_Treatment_HT1080_DMSO_control	HT1080_13-biotin	No	lm
XPO1	sp|O14980|XPO1_HUMAN	2.68136	2.69719	1.63296	Factor_Treatment_HT1080_DMSO_control	HT1080_13-biotin	No	lmer
DYNC1H1	sp|Q14204|DYHC1_HUMAN	1.63124	2.55749	1.50663	Factor_Treatment_HT1080_DMSO_control	HT1080_13-biotin	No	lmer
CCT6A	sp|P40227|TCPZ_HUMAN	3.52482	2.5284	1.4905	Factor_Treatment_HT1080_DMSO_control	HT1080_13-biotin	No	lm
CCN2	sp|P29279|CCN2_HUMAN	4.27299	2.49927	1.47396	Factor_Treatment_HT1080_DMSO_control	HT1080_13-biotin	No	lm
HSPA1B	tr|A0A0G2JIW1|A0A0G2JIW1_HUMAN	1.74139	2.45247	1.4394	Factor_Treatment_HT1080_DMSO_control	HT1080_13-biotin	No	lmer
SLC25A3	sp|Q00325|MPCP_HUMAN	2.03457	2.40522	1.40405	Factor_Treatment_HT1080_DMSO_control	HT1080_13-biotin	No	lm
SLC25A5	sp|P05141|ADT2_HUMAN	1.56587	2.36632	1.37673	Factor_Treatment_HT1080_DMSO_control	HT1080_13-biotin	No	lm
GSN	sp|P06396|GELS_HUMAN	3.49183	2.34208	1.37476	Factor_Treatment_HT1080_DMSO_control	HT1080_13-biotin	No	lm
SLC25A4	sp|P12235|ADT1_HUMAN	1.2742	2.34683	1.37476	Factor_Treatment_HT1080_DMSO_control	HT1080_13-biotin	No	lm
TUBB	sp|P07437|TBB5_HUMAN	2.59582	2.25774	1.30757	Factor_Treatment_HT1080_DMSO_control	HT1080_13-biotin	No	lmer
TMEM165	sp|Q9HC07|TM165_HUMAN	5.90181	2.2537	1.30757	Factor_Treatment_HT1080_DMSO_control	HT1080_13-biotin	No	lm
GEMIN4	sp|P57678|GEMI4_HUMAN	2.80625	2.221	1.29508	Factor_Treatment_HT1080_DMSO_control	HT1080_13-biotin	No	lmer
TXNRD1	sp|Q16881|TRXR1_HUMAN	2.5387	2.22487	1.29508	Factor_Treatment_HT1080_DMSO_control	HT1080_13-biotin	No	lmer
VAC14	sp|Q08AM6|VAC14_HUMAN	2.51396	2.18583	1.26967	Factor_Treatment_HT1080_DMSO_control	HT1080_13-biotin	No	lm
ACTG1	sp|P63261|ACTG_HUMAN	1.44183	2.17118	1.26456	Factor_Treatment_HT1080_DMSO_control	HT1080_13-biotin	No	lmer
MAGED2	sp|Q9UNF1|MAGD2_HUMAN	2.91153	2.12418	1.2269	Factor_Treatment_HT1080_DMSO_control	HT1080_13-biotin	No	lm
HSPA9	sp|P38646|GRP75_HUMAN	1.85652	1.99668	1.13488	Factor_Treatment_HT1080_DMSO_control	HT1080_13-biotin	No	lmer
SEC13	sp|P55735|SEC13_HUMAN	2.39325	2.0047	1.13488	Factor_Treatment_HT1080_DMSO_control	HT1080_13-biotin	No	lm
MYH10	sp|P35580|MYH10_HUMAN	1.3651	2.02189	1.13488	Factor_Treatment_HT1080_DMSO_control	HT1080_13-biotin	No	lmer
CAND1	sp|Q86VP6|CAND1_HUMAN	2.22063	1.99776	1.13488	Factor_Treatment_HT1080_DMSO_control	HT1080_13-biotin	No	lmer
PFKP	sp|Q01813|PFKAP_HUMAN	1.64588	1.88915	1.03578	Factor_Treatment_HT1080_DMSO_control	HT1080_13-biotin	No	lm
EEF1A1	sp|P68104|EF1A1_HUMAN	1.65909	1.80485	0.964687	Factor_Treatment_HT1080_DMSO_control	HT1080_13-biotin	No	lmer
XPOT	sp|O43592|XPOT_HUMAN	2.32273	1.80167	0.964687	Factor_Treatment_HT1080_DMSO_control	HT1080_13-biotin	No	lm
TOR1AIP2	sp|Q8NFQ8|TOIP2_HUMAN	2.10042	1.79115	0.962143	Factor_Treatment_HT1080_DMSO_control	HT1080_13-biotin	No	lm
RPN1	sp|P04843|RPN1_HUMAN	2.09531	1.76706	0.945879	Factor_Treatment_HT1080_DMSO_control	HT1080_13-biotin	No	lmer
HACD3	sp|Q9P035|HACD3_HUMAN	6.71279	1.74592	0.932426	Factor_Treatment_HT1080_DMSO_control	HT1080_13-biotin	No	lm
IPO7	sp|O95373|IPO7_HUMAN	3.06612	1.71896	0.920433	Factor_Treatment_HT1080_DMSO_control	HT1080_13-biotin	No	lmer
HSD17B12	sp|Q53GQ0|DHB12_HUMAN	1.46122	1.72191	0.920433	Factor_Treatment_HT1080_DMSO_control	HT1080_13-biotin	No	lm
THBS1	sp|P07996|TSP1_HUMAN	3.95353	1.7011	0.91706	Factor_Treatment_HT1080_DMSO_control	HT1080_13-biotin	No	lm
LTN1	sp|O94822|LTN1_HUMAN	1.66317	1.70744	0.91706	Factor_Treatment_HT1080_DMSO_control	HT1080_13-biotin	No	lm
PC	sp|P11498|PYC_HUMAN	-0.72531	1.69157	0.914589	Factor_Treatment_HT1080_DMSO_control	HT1080_13-biotin	No	lmer
DLAT	sp|P10515|ODP2_HUMAN	5.3586	1.64817	0.87814	Factor_Treatment_HT1080_DMSO_control	HT1080_13-biotin	No	lm
LIMA1	sp|Q9UHB6|LIMA1_HUMAN	-3.20516	1.63291	0.876453	Factor_Treatment_HT1080_DMSO_control	HT1080_13-biotin	No	lm
SMN1	sp|Q16637|SMN_HUMAN	2.85283	1.63645	0.876453	Factor_Treatment_HT1080_DMSO_control	HT1080_13-biotin	No	lm
HSPD1	sp|P10809|CH60_HUMAN	1.79086	1.62215	0.872318	Factor_Treatment_HT1080_DMSO_control	HT1080_13-biotin	No	lmer
PHGDH	sp|O43175|SERA_HUMAN	1.79418	1.61133	0.868036	Factor_Treatment_HT1080_DMSO_control	HT1080_13-biotin	No	lmer
IQGAP3	sp|Q86VI3|IQGA3_HUMAN	2.8583	1.58382	0.846955	Factor_Treatment_HT1080_DMSO_control	HT1080_13-biotin	No	lm
PPP6R3	sp|Q5H9R7|PP6R3_HUMAN	3.57211	1.54075	0.839478	Factor_Treatment_HT1080_DMSO_control	HT1080_13-biotin	No	lm
PDIA6	sp|Q15084|PDIA6_HUMAN	4.5649	1.53082	0.839478	Factor_Treatment_HT1080_DMSO_control	HT1080_13-biotin	No	lm
NUP93	tr|H3BVG0|H3BVG0_HUMAN	1.64487	1.55201	0.839478	Factor_Treatment_HT1080_DMSO_control	HT1080_13-biotin	No	lm
RCN2	sp|Q14257|RCN2_HUMAN	1.80077	1.53485	0.839478	Factor_Treatment_HT1080_DMSO_control	HT1080_13-biotin	No	lmer
SLC16A1	sp|P53985|MOT1_HUMAN	3.24719	1.52804	0.839478	Factor_Treatment_HT1080_DMSO_control	HT1080_13-biotin	No	lm
ATP5F1A	sp|P25705|ATPA_HUMAN	1.5002	1.53532	0.839478	Factor_Treatment_HT1080_DMSO_control	HT1080_13-biotin	No	lmer
TUBB4B	sp|P68371|TBB4B_HUMAN	1.50693	1.5626	0.839478	Factor_Treatment_HT1080_DMSO_control	HT1080_13-biotin	No	lmer
RPA2	sp|P15927|RFA2_HUMAN	3.17737	1.54751	0.839478	Factor_Treatment_HT1080_DMSO_control	HT1080_13-biotin	No	lm
SEC61A1	tr|B4DR61|B4DR61_HUMAN	1.43624	1.50152	0.824243	Factor_Treatment_HT1080_DMSO_control	HT1080_13-biotin	No	lm
RPS16	sp|P62249|RS16_HUMAN	1.00023	1.50201	0.824243	Factor_Treatment_HT1080_DMSO_control	HT1080_13-biotin	No	lm
TUBA4A	sp|P68366|TBA4A_HUMAN	2.48419	1.49384	0.822092	Factor_Treatment_HT1080_DMSO_control	HT1080_13-biotin	No	lm
SQOR	sp|Q9Y6N5|SQOR_HUMAN	3.28021	1.48753	0.821247	Factor_Treatment_HT1080_DMSO_control	HT1080_13-biotin	No	lm
BZW2	sp|Q9Y6E2|BZW2_HUMAN	3.46312	1.46412	0.803234	Factor_Treatment_HT1080_DMSO_control	HT1080_13-biotin	No	lm
CSE1L	sp|P55060|XPO2_HUMAN	2.36877	1.43777	0.78221	Factor_Treatment_HT1080_DMSO_control	HT1080_13-biotin	No	lm
KRAS	sp|P01116|RASK_HUMAN	3.44955	1.42985	0.779553	Factor_Treatment_HT1080_DMSO_control	HT1080_13-biotin	No	lm
SLC3A2	tr|J3KPF3|J3KPF3_HUMAN	1.04627	1.41027	0.765178	Factor_Treatment_HT1080_DMSO_control	HT1080_13-biotin	No	lmer
EEF2	sp|P13639|EF2_HUMAN	2.09954	1.38997	0.755099	Factor_Treatment_HT1080_DMSO_control	HT1080_13-biotin	No	lmer
ICAM1	sp|P05362|ICAM1_HUMAN	-2.2455	1.39173	0.755099	Factor_Treatment_HT1080_DMSO_control	HT1080_13-biotin	No	lm
MYO1C	sp|O00159|MYO1C_HUMAN	2.79105	1.36805	0.738196	Factor_Treatment_HT1080_DMSO_control	HT1080_13-biotin	No	lmer
RPA3	sp|P35244|RFA3_HUMAN	3.6382	1.35638	0.734414	Factor_Treatment_HT1080_DMSO_control	HT1080_13-biotin	No	lm
TUBA3D	sp|P0DPH8|TBA3D_HUMAN	2.11075	1.34955	0.734414	Factor_Treatment_HT1080_DMSO_control	HT1080_13-biotin	No	lm
NCAPD2	sp|Q15021|CND1_HUMAN	3.07988	1.35258	0.734414	Factor_Treatment_HT1080_DMSO_control	HT1080_13-biotin	No	lm
MAN1B1	sp|Q9UKM7|MA1B1_HUMAN	-5.30729	1.33787	0.731078	Factor_Treatment_HT1080_DMSO_control	HT1080_13-biotin	No	lm
SPR	sp|P35270|SPRE_HUMAN	5.22962	1.33197	0.731078	Factor_Treatment_HT1080_DMSO_control	HT1080_13-biotin	No	lm
MYEF2	tr|A0A0A0MR39|A0A0A0MR39_HUMAN	0.799587	1.3358	0.731078	Factor_Treatment_HT1080_DMSO_control	HT1080_13-biotin	No	lm
CDK1	sp|P06493|CDK1_HUMAN	1.60616	1.29665	0.700407	Factor_Treatment_HT1080_DMSO_control	HT1080_13-biotin	No	lm
SPTLC2	sp|O15270|SPTC2_HUMAN	1.63562	1.27822	0.694968	Factor_Treatment_HT1080_DMSO_control	HT1080_13-biotin	No	lm
UQCRC2	sp|P22695|QCR2_HUMAN	3.18992	1.27757	0.694968	Factor_Treatment_HT1080_DMSO_control	HT1080_13-biotin	No	lm
RPS4X	sp|P62701|RS4X_HUMAN	2.42846	1.27949	0.694968	Factor_Treatment_HT1080_DMSO_control	HT1080_13-biotin	No	lm
HEATR1	sp|Q9H583|HEAT1_HUMAN	2.82191	1.26163	0.683486	Factor_Treatment_HT1080_DMSO_control	HT1080_13-biotin	No	lm
PPP6R1	sp|Q9UPN7|PP6R1_HUMAN	3.76339	1.25143	0.682488	Factor_Treatment_HT1080_DMSO_control	HT1080_13-biotin	No	lm
HNRNPK	sp|P61978|HNRPK_HUMAN	2.14824	1.24754	0.682488	Factor_Treatment_HT1080_DMSO_control	HT1080_13-biotin	No	lmer
SUN2	sp|Q9UH99|SUN2_HUMAN	2.48577	1.24871	0.682488	Factor_Treatment_HT1080_DMSO_control	HT1080_13-biotin	No	lm
PGAM5	sp|Q96HS1|PGAM5_HUMAN	1.58347	1.23129	0.670521	Factor_Treatment_HT1080_DMSO_control	HT1080_13-biotin	No	lm
TNPO1	sp|Q92973|TNPO1_HUMAN	2.39725	1.20405	0.650908	Factor_Treatment_HT1080_DMSO_control	HT1080_13-biotin	No	lmer
NUP214	sp|P35658|NU214_HUMAN	0.661307	1.20325	0.650908	Factor_Treatment_HT1080_DMSO_control	HT1080_13-biotin	No	lm
ACTA2	sp|P62736|ACTA_HUMAN	1.44261	1.19499	0.64681	Factor_Treatment_HT1080_DMSO_control	HT1080_13-biotin	No	lmer
COPA	sp|P53621|COPA_HUMAN	5.2284	1.18816	0.644092	Factor_Treatment_HT1080_DMSO_control	HT1080_13-biotin	No	lm
ATP5F1B	sp|P06576|ATPB_HUMAN	2.86465	1.15489	0.635987	Factor_Treatment_HT1080_DMSO_control	HT1080_13-biotin	No	lm
TPM3	tr|A0A087WWU8|A0A087WWU8_HUMAN	2.46041	1.16924	0.635987	Factor_Treatment_HT1080_DMSO_control	HT1080_13-biotin	No	lm
ERLIN1	sp|O75477|ERLN1_HUMAN	2.92385	1.15605	0.635987	Factor_Treatment_HT1080_DMSO_control	HT1080_13-biotin	No	lm
CCN1	sp|O00622|CCN1_HUMAN	1.79863	1.15505	0.635987	Factor_Treatment_HT1080_DMSO_control	HT1080_13-biotin	No	lm
CANX	sp|P27824|CALX_HUMAN	1.14211	1.15228	0.635987	Factor_Treatment_HT1080_DMSO_control	HT1080_13-biotin	No	lm
YBX1	tr|H0Y449|H0Y449_HUMAN	2.19419	1.15595	0.635987	Factor_Treatment_HT1080_DMSO_control	HT1080_13-biotin	No	lm
TPM1	tr|Q6ZN40|Q6ZN40_HUMAN	1.81551	1.17139	0.635987	Factor_Treatment_HT1080_DMSO_control	HT1080_13-biotin	No	lmer
CKAP4	sp|Q07065|CKAP4_HUMAN	3.44382	1.13974	0.634823	Factor_Treatment_HT1080_DMSO_control	HT1080_13-biotin	No	lm
ARFGEF1	sp|Q9Y6D6|BIG1_HUMAN	1.94143	1.14601	0.634823	Factor_Treatment_HT1080_DMSO_control	HT1080_13-biotin	No	lmer
BAG2	sp|O95816|BAG2_HUMAN	0.895548	1.14017	0.634823	Factor_Treatment_HT1080_DMSO_control	HT1080_13-biotin	No	lm
FLNA	sp|P21333|FLNA_HUMAN	1.7878	1.12018	0.621976	Factor_Treatment_HT1080_DMSO_control	HT1080_13-biotin	No	lmer
ECPAS	tr|J3KN16|J3KN16_HUMAN	2.59773	1.11947	0.621976	Factor_Treatment_HT1080_DMSO_control	HT1080_13-biotin	No	lm
ACACA	sp|Q13085|ACACA_HUMAN	-0.402319	1.10668	0.620086	Factor_Treatment_HT1080_DMSO_control	HT1080_13-biotin	No	lmer
FASN	sp|P49327|FAS_HUMAN	5.539	1.10896	0.620086	Factor_Treatment_HT1080_DMSO_control	HT1080_13-biotin	No	lm
CIP2A	tr|A0A087X211|A0A087X211_HUMAN	2.90949	1.10768	0.620086	Factor_Treatment_HT1080_DMSO_control	HT1080_13-biotin	No	lm
LOXL2	sp|Q9Y4K0|LOXL2_HUMAN	2.98225	1.07688	0.59387	Factor_Treatment_HT1080_DMSO_control	HT1080_13-biotin	No	lm
IGF2BP1	sp|Q9NZI8|IF2B1_HUMAN	0.95671	1.07324	0.593771	Factor_Treatment_HT1080_DMSO_control	HT1080_13-biotin	No	lm
SLC1A5	sp|Q15758|AAAT_HUMAN	1.90954	1.064	0.588043	Factor_Treatment_HT1080_DMSO_control	HT1080_13-biotin	No	lm
SQSTM1	sp|Q13501|SQSTM_HUMAN	1.96102	1.05752	0.585059	Factor_Treatment_HT1080_DMSO_control	HT1080_13-biotin	No	lm
MPRIP	tr|A0A494BZV2|A0A494BZV2_HUMAN	2.56996	1.0228	0.567372	Factor_Treatment_HT1080_DMSO_control	HT1080_13-biotin	No	lmer
ITGA3	sp|P26006|ITA3_HUMAN	2.00716	1.02814	0.567372	Factor_Treatment_HT1080_DMSO_control	HT1080_13-biotin	No	lm
STT3A	sp|P46977|STT3A_HUMAN	2.08113	1.03003	0.567372	Factor_Treatment_HT1080_DMSO_control	HT1080_13-biotin	No	lm
ATL3	sp|Q6DD88|ATLA3_HUMAN	1.8385	1.02983	0.567372	Factor_Treatment_HT1080_DMSO_control	HT1080_13-biotin	No	lm
QSOX2	sp|Q6ZRP7|QSOX2_HUMAN	6.25419	1.02511	0.567372	Factor_Treatment_HT1080_DMSO_control	HT1080_13-biotin	No	lm
SELENOO	sp|Q9BVL4|SELO_HUMAN	4.50917	1.00414	0.55204	Factor_Treatment_HT1080_DMSO_control	HT1080_13-biotin	No	lm
EGFR	sp|P00533|EGFR_HUMAN	1.05804	0.988937	0.540137	Factor_Treatment_HT1080_DMSO_control	HT1080_13-biotin	No	lm
TUBA1A	sp|Q71U36|TBA1A_HUMAN	1.1441	0.979759	0.534237	Factor_Treatment_HT1080_DMSO_control	HT1080_13-biotin	No	lm
TECR	tr|M0R2N5|M0R2N5_HUMAN	1.24218	0.976235	0.533966	Factor_Treatment_HT1080_DMSO_control	HT1080_13-biotin	No	lm
FLNB	sp|O75369|FLNB_HUMAN	1.28922	0.968979	0.529939	Factor_Treatment_HT1080_DMSO_control	HT1080_13-biotin	No	lmer
SDF4	sp|Q9BRK5|CAB45_HUMAN	3.7739	0.956886	0.521051	Factor_Treatment_HT1080_DMSO_control	HT1080_13-biotin	No	lm
HSP90AB1	sp|P08238|HS90B_HUMAN	1.56618	0.943795	0.511142	Factor_Treatment_HT1080_DMSO_control	HT1080_13-biotin	No	lmer
RPL12	sp|P30050|RL12_HUMAN	1.87842	0.930686	0.501191	Factor_Treatment_HT1080_DMSO_control	HT1080_13-biotin	No	lm
M6PR	sp|P20645|MPRD_HUMAN	3.7963	0.918745	0.492386	Factor_Treatment_HT1080_DMSO_control	HT1080_13-biotin	No	lm
TRIP13	sp|Q15645|PCH2_HUMAN	1.3541	0.912952	0.489706	Factor_Treatment_HT1080_DMSO_control	HT1080_13-biotin	No	lmer
TXNL1	sp|O43396|TXNL1_HUMAN	2.51177	0.907455	0.4873	Factor_Treatment_HT1080_DMSO_control	HT1080_13-biotin	No	lm
SMC2	sp|O95347|SMC2_HUMAN	2.68782	0.893766	0.479728	Factor_Treatment_HT1080_DMSO_control	HT1080_13-biotin	No	lm
ATXN10	sp|Q9UBB4|ATX10_HUMAN	4.81233	0.896196	0.479728	Factor_Treatment_HT1080_DMSO_control	HT1080_13-biotin	No	lm
RPLP0	sp|P05388|RLA0_HUMAN	2.14134	0.884346	0.473335	Factor_Treatment_HT1080_DMSO_control	HT1080_13-biotin	No	lmer
IPO4	sp|Q8TEX9|IPO4_HUMAN	2.50272	0.872198	0.468277	Factor_Treatment_HT1080_DMSO_control	HT1080_13-biotin	No	lm
NCEH1	tr|A0A0A0MTJ9|A0A0A0MTJ9_HUMAN	3.34597	0.870334	0.468277	Factor_Treatment_HT1080_DMSO_control	HT1080_13-biotin	No	lm
TMX3	sp|Q96JJ7|TMX3_HUMAN	2.6867	0.874858	0.468277	Factor_Treatment_HT1080_DMSO_control	HT1080_13-biotin	No	lm
TIMM50	sp|Q3ZCQ8|TIM50_HUMAN	2.54495	0.859074	0.459962	Factor_Treatment_HT1080_DMSO_control	HT1080_13-biotin	No	lm
ARF4	sp|P18085|ARF4_HUMAN	1.90609	0.854289	0.458101	Factor_Treatment_HT1080_DMSO_control	HT1080_13-biotin	No	lm
NPM1	sp|P06748|NPM_HUMAN	2.7372	0.8399	0.446618	Factor_Treatment_HT1080_DMSO_control	HT1080_13-biotin	No	lm
AKAP8L	sp|Q9ULX6|AKP8L_HUMAN	1.92112	0.831614	0.441217	Factor_Treatment_HT1080_DMSO_control	HT1080_13-biotin	No	lm
RPA1	sp|P27694|RFA1_HUMAN	2.56386	0.826068	0.438537	Factor_Treatment_HT1080_DMSO_control	HT1080_13-biotin	No	lmer
RICTOR	sp|Q6R327|RICTR_HUMAN	1.59912	0.822751	0.438068	Factor_Treatment_HT1080_DMSO_control	HT1080_13-biotin	No	lm
PRDX4	sp|Q13162|PRDX4_HUMAN	2.1275	0.805005	0.423151	Factor_Treatment_HT1080_DMSO_control	HT1080_13-biotin	No	lm
DARS1	sp|P14868|SYDC_HUMAN	1.64588	0.801062	0.422019	Factor_Treatment_HT1080_DMSO_control	HT1080_13-biotin	No	lm
EMD	sp|P50402|EMD_HUMAN	2.33595	0.787092	0.410843	Factor_Treatment_HT1080_DMSO_control	HT1080_13-biotin	No	lm
ARL6IP4	sp|Q66PJ3|AR6P4_HUMAN	0.471671	0.773828	0.400354	Factor_Treatment_HT1080_DMSO_control	HT1080_13-biotin	No	lm
PCNT	sp|O95613|PCNT_HUMAN	0.410049	0.770814	0.400097	Factor_Treatment_HT1080_DMSO_control	HT1080_13-biotin	No	lm
C17orf75	sp|Q9HAS0|NJMU_HUMAN	1.76786	0.758597	0.39062	Factor_Treatment_HT1080_DMSO_control	HT1080_13-biotin	No	lm
ESYT2	sp|A0FGR8|ESYT2_HUMAN	3.46397	0.752744	0.390035	Factor_Treatment_HT1080_DMSO_control	HT1080_13-biotin	No	lm
SERPINH1	sp|P50454|SERPH_HUMAN	2.59281	0.752583	0.390035	Factor_Treatment_HT1080_DMSO_control	HT1080_13-biotin	No	lm
PCBP2	sp|Q15366|PCBP2_HUMAN	1.34987	0.749426	0.389567	Factor_Treatment_HT1080_DMSO_control	HT1080_13-biotin	No	lm
MAD2L1	sp|Q13257|MD2L1_HUMAN	1.6942	0.738997	0.381811	Factor_Treatment_HT1080_DMSO_control	HT1080_13-biotin	No	lm
RPS3	sp|P23396|RS3_HUMAN	1.18328	0.723554	0.379701	Factor_Treatment_HT1080_DMSO_control	HT1080_13-biotin	No	lmer
IARS1	sp|P41252|SYIC_HUMAN	2.02043	0.716784	0.379701	Factor_Treatment_HT1080_DMSO_control	HT1080_13-biotin	No	lm
S100A6	sp|P06703|S10A6_HUMAN	2.47689	0.727054	0.379701	Factor_Treatment_HT1080_DMSO_control	HT1080_13-biotin	No	lm
IPO11	sp|Q9UI26|IPO11_HUMAN	1.44979	0.721485	0.379701	Factor_Treatment_HT1080_DMSO_control	HT1080_13-biotin	No	lm
LMNA	sp|P02545|LMNA_HUMAN	1.28525	0.713546	0.379701	Factor_Treatment_HT1080_DMSO_control	HT1080_13-biotin	No	lmer
PPP6C	sp|O00743|PPP6_HUMAN	2.2493	0.71392	0.379701	Factor_Treatment_HT1080_DMSO_control	HT1080_13-biotin	No	lm
UBC	sp|P0CG48|UBC_HUMAN	4.2138	0.719419	0.379701	Factor_Treatment_HT1080_DMSO_control	HT1080_13-biotin	No	lm
PPM1G	sp|O15355|PPM1G_HUMAN	1.69489	0.722602	0.379701	Factor_Treatment_HT1080_DMSO_control	HT1080_13-biotin	No	lm
XPO5	sp|Q9HAV4|XPO5_HUMAN	1.65407	0.724595	0.379701	Factor_Treatment_HT1080_DMSO_control	HT1080_13-biotin	No	lm
PABPC1	sp|P11940|PABP1_HUMAN	2.93817	0.707322	0.375994	Factor_Treatment_HT1080_DMSO_control	HT1080_13-biotin	No	lm
ESRP1	sp|Q6NXG1|ESRP1_HUMAN	3.03974	0.703561	0.374737	Factor_Treatment_HT1080_DMSO_control	HT1080_13-biotin	No	lm
HNRNPF	sp|P52597|HNRPF_HUMAN	3.6843	0.680731	0.369312	Factor_Treatment_HT1080_DMSO_control	HT1080_13-biotin	No	lm
SCD	sp|O00767|ACOD_HUMAN	1.0902	0.68287	0.369312	Factor_Treatment_HT1080_DMSO_control	HT1080_13-biotin	No	lm
RPL21	sp|P46778|RL21_HUMAN	1.52985	0.680772	0.369312	Factor_Treatment_HT1080_DMSO_control	HT1080_13-biotin	No	lm
TBC1D9B	sp|Q66K14|TBC9B_HUMAN	3.68371	0.691427	0.369312	Factor_Treatment_HT1080_DMSO_control	HT1080_13-biotin	No	lm
PRMT1	sp|Q99873|ANM1_HUMAN	2.47981	0.678365	0.369312	Factor_Treatment_HT1080_DMSO_control	HT1080_13-biotin	No	lm
RPL22	sp|P35268|RL22_HUMAN	1.31874	0.679281	0.369312	Factor_Treatment_HT1080_DMSO_control	HT1080_13-biotin	No	lm
SSR1	tr|C9IZQ1|C9IZQ1_HUMAN	1.64075	0.682735	0.369312	Factor_Treatment_HT1080_DMSO_control	HT1080_13-biotin	No	lm
CNP	sp|P09543|CN37_HUMAN	2.83768	0.676234	0.369312	Factor_Treatment_HT1080_DMSO_control	HT1080_13-biotin	No	lm
DIABLO	sp|Q9NR28|DBLOH_HUMAN	4.82131	0.687023	0.369312	Factor_Treatment_HT1080_DMSO_control	HT1080_13-biotin	No	lm
RAN	tr|J3KQE5|J3KQE5_HUMAN	1.35274	0.669148	0.364592	Factor_Treatment_HT1080_DMSO_control	HT1080_13-biotin	No	lm
CSNK1A1	tr|A0A590UJ43|A0A590UJ43_HUMAN	1.681	0.664906	0.362704	Factor_Treatment_HT1080_DMSO_control	HT1080_13-biotin	No	lm
RPL6	sp|Q02878|RL6_HUMAN	1.53645	0.643033	0.350338	Factor_Treatment_HT1080_DMSO_control	HT1080_13-biotin	No	lmer
RPL14	sp|P50914|RL14_HUMAN	5.51567	0.642916	0.350338	Factor_Treatment_HT1080_DMSO_control	HT1080_13-biotin	No	lm
GOLGA3	sp|Q08378|GOGA3_HUMAN	-0.339319	0.641742	0.350338	Factor_Treatment_HT1080_DMSO_control	HT1080_13-biotin	No	lm
SERPINE1	sp|P05121|PAI1_HUMAN	1.54906	0.643214	0.350338	Factor_Treatment_HT1080_DMSO_control	HT1080_13-biotin	No	lm
RPS11	sp|P62280|RS11_HUMAN	1.01492	0.640959	0.350338	Factor_Treatment_HT1080_DMSO_control	HT1080_13-biotin	No	lmer
RHEB	sp|Q15382|RHEB_HUMAN	4.12133	0.638088	0.349747	Factor_Treatment_HT1080_DMSO_control	HT1080_13-biotin	No	lm
PSMC3	sp|P17980|PRS6A_HUMAN	1.74696	0.6257	0.349511	Factor_Treatment_HT1080_DMSO_control	HT1080_13-biotin	No	lm
IMMT	sp|Q16891|MIC60_HUMAN	2.38319	0.627024	0.349511	Factor_Treatment_HT1080_DMSO_control	HT1080_13-biotin	No	lm
PSMD11	sp|O00231|PSD11_HUMAN	2.51669	0.625509	0.349511	Factor_Treatment_HT1080_DMSO_control	HT1080_13-biotin	No	lm
DHCR24	tr|A0A0A0MTI1|A0A0A0MTI1_HUMAN	0.849092	0.626666	0.349511	Factor_Treatment_HT1080_DMSO_control	HT1080_13-biotin	No	lm
PLEC	sp|Q15149|PLEC_HUMAN	1.30966	0.627646	0.349511	Factor_Treatment_HT1080_DMSO_control	HT1080_13-biotin	No	lmer
MYO1B	sp|O43795|MYO1B_HUMAN	1.84444	0.624419	0.349511	Factor_Treatment_HT1080_DMSO_control	HT1080_13-biotin	No	lmer
RUVBL1	sp|Q9Y265|RUVB1_HUMAN	2.2882	0.619287	0.346578	Factor_Treatment_HT1080_DMSO_control	HT1080_13-biotin	No	lm
DNAJA2	sp|O60884|DNJA2_HUMAN	2.14697	0.61433	0.345986	Factor_Treatment_HT1080_DMSO_control	HT1080_13-biotin	No	lm
TUBAL3	sp|A6NHL2|TBAL3_HUMAN	1.41616	0.615071	0.345986	Factor_Treatment_HT1080_DMSO_control	HT1080_13-biotin	No	lm
RPS26P11	sp|Q5JNZ5|RS26L_HUMAN	0.86597	0.609712	0.343534	Factor_Treatment_HT1080_DMSO_control	HT1080_13-biotin	No	lm
ANXA2	sp|P07355|ANXA2_HUMAN	1.58386	0.595898	0.331875	Factor_Treatment_HT1080_DMSO_control	HT1080_13-biotin	No	lmer
EPRS1	sp|P07814|SYEP_HUMAN	1.62663	0.589718	0.331687	Factor_Treatment_HT1080_DMSO_control	HT1080_13-biotin	No	lm
HK2	sp|P52789|HXK2_HUMAN	1.16193	0.592261	0.331687	Factor_Treatment_HT1080_DMSO_control	HT1080_13-biotin	No	lm
DNAJA1	sp|P31689|DNJA1_HUMAN	0.678139	0.585091	0.331687	Factor_Treatment_HT1080_DMSO_control	HT1080_13-biotin	No	lm
TMPO	sp|P42166|LAP2A_HUMAN	1.68212	0.585467	0.331687	Factor_Treatment_HT1080_DMSO_control	HT1080_13-biotin	No	lmer
PCNA	sp|P12004|PCNA_HUMAN	1.20555	0.585784	0.331687	Factor_Treatment_HT1080_DMSO_control	HT1080_13-biotin	No	lm
TFRC	sp|P02786|TFR1_HUMAN	1.05936	0.574631	0.323321	Factor_Treatment_HT1080_DMSO_control	HT1080_13-biotin	No	lm
RBBP7	sp|Q16576|RBBP7_HUMAN	2.74356	0.568701	0.319473	Factor_Treatment_HT1080_DMSO_control	HT1080_13-biotin	No	lm
PHB2	sp|Q99623|PHB2_HUMAN	1.63349	0.562363	0.315209	Factor_Treatment_HT1080_DMSO_control	HT1080_13-biotin	No	lm
TRIM28	sp|Q13263|TIF1B_HUMAN	1.53575	0.551785	0.308513	Factor_Treatment_HT1080_DMSO_control	HT1080_13-biotin	No	lm
MYL6	tr|B7Z6Z4|B7Z6Z4_HUMAN	1.64887	0.551551	0.308513	Factor_Treatment_HT1080_DMSO_control	HT1080_13-biotin	No	lm
ATP1A3	tr|A0A0A0MT26|A0A0A0MT26_HUMAN	0.763664	0.540768	0.299774	Factor_Treatment_HT1080_DMSO_control	HT1080_13-biotin	No	lm
NUP62	sp|P37198|NUP62_HUMAN	0.670614	0.53647	0.29751	Factor_Treatment_HT1080_DMSO_control	HT1080_13-biotin	No	lm
GNAI2	sp|P04899|GNAI2_HUMAN	2.54421	0.531898	0.294962	Factor_Treatment_HT1080_DMSO_control	HT1080_13-biotin	No	lm
H3-3B	tr|K7ES00|K7ES00_HUMAN	0.622973	0.524637	0.289716	Factor_Treatment_HT1080_DMSO_control	HT1080_13-biotin	No	lm
IPO9	sp|Q96P70|IPO9_HUMAN	2.65788	0.514444	0.282097	Factor_Treatment_HT1080_DMSO_control	HT1080_13-biotin	No	lm
RPL13A	tr|M0QYS1|M0QYS1_HUMAN	0.548573	0.513014	0.282097	Factor_Treatment_HT1080_DMSO_control	HT1080_13-biotin	No	lm
BSG	sp|P35613|BASI_HUMAN	2.22621	0.507559	0.280104	Factor_Treatment_HT1080_DMSO_control	HT1080_13-biotin	No	lm
CALM2	tr|E7EMB3|E7EMB3_HUMAN	1.82722	0.507055	0.280104	Factor_Treatment_HT1080_DMSO_control	HT1080_13-biotin	No	lm
TUFM	sp|P49411|EFTU_HUMAN	1.28764	0.503133	0.278152	Factor_Treatment_HT1080_DMSO_control	HT1080_13-biotin	No	lm
PCM1	sp|Q15154|PCM1_HUMAN	3.16157	0.500702	0.277681	Factor_Treatment_HT1080_DMSO_control	HT1080_13-biotin	No	lm
BANF1	sp|O75531|BAF_HUMAN	0.736077	0.484362	0.263293	Factor_Treatment_HT1080_DMSO_control	HT1080_13-biotin	No	lm
EXOC4	sp|Q96A65|EXOC4_HUMAN	1.45698	0.47487	0.261522	Factor_Treatment_HT1080_DMSO_control	HT1080_13-biotin	No	lm
CAPZA1	sp|P52907|CAZA1_HUMAN	2.77313	0.478391	0.261522	Factor_Treatment_HT1080_DMSO_control	HT1080_13-biotin	No	lm
ABCB6	sp|Q9NP58|ABCB6_HUMAN	2.08118	0.479004	0.261522	Factor_Treatment_HT1080_DMSO_control	HT1080_13-biotin	No	lm
LDHB	tr|A0A5F9ZHM4|A0A5F9ZHM4_HUMAN	-0.923419	0.475372	0.261522	Factor_Treatment_HT1080_DMSO_control	HT1080_13-biotin	No	lm
EDC4	sp|Q6P2E9|EDC4_HUMAN	2.03631	0.465812	0.254373	Factor_Treatment_HT1080_DMSO_control	HT1080_13-biotin	No	lm
PSMD2	sp|Q13200|PSMD2_HUMAN	2.1726	0.455041	0.245502	Factor_Treatment_HT1080_DMSO_control	HT1080_13-biotin	No	lm
SPTLC1	sp|O15269|SPTC1_HUMAN	0.293551	0.446333	0.238687	Factor_Treatment_HT1080_DMSO_control	HT1080_13-biotin	No	lm
NUP205	sp|Q92621|NU205_HUMAN	1.2138	0.439752	0.234691	Factor_Treatment_HT1080_DMSO_control	HT1080_13-biotin	No	lm
RPL7A	sp|P62424|RL7A_HUMAN	3.40433	0.43735	0.234691	Factor_Treatment_HT1080_DMSO_control	HT1080_13-biotin	No	lm
BIRC2	sp|Q13490|BIRC2_HUMAN	-3.97457	0.436484	0.234691	Factor_Treatment_HT1080_DMSO_control	HT1080_13-biotin	No	lm
HSP90AA1	sp|P07900|HS90A_HUMAN	0.762857	0.434849	0.234691	Factor_Treatment_HT1080_DMSO_control	HT1080_13-biotin	No	lmer
SEC61B	sp|P60468|SC61B_HUMAN	1.75793	0.431437	0.233131	Factor_Treatment_HT1080_DMSO_control	HT1080_13-biotin	No	lm
VIM	sp|P08670|VIME_HUMAN	0.888786	0.418897	0.227614	Factor_Treatment_HT1080_DMSO_control	HT1080_13-biotin	No	lmer
AHSA1	sp|O95433|AHSA1_HUMAN	1.04329	0.423289	0.227614	Factor_Treatment_HT1080_DMSO_control	HT1080_13-biotin	No	lm
ITPRIP	sp|Q8IWB1|IPRI_HUMAN	0.595871	0.414971	0.227614	Factor_Treatment_HT1080_DMSO_control	HT1080_13-biotin	No	lm
RPN2	sp|P04844|RPN2_HUMAN	1.17989	0.416681	0.227614	Factor_Treatment_HT1080_DMSO_control	HT1080_13-biotin	No	lm
TMOD3	sp|Q9NYL9|TMOD3_HUMAN	1.52197	0.421735	0.227614	Factor_Treatment_HT1080_DMSO_control	HT1080_13-biotin	No	lm
IPO5	tr|H0Y8C6|H0Y8C6_HUMAN	1.90546	0.41787	0.227614	Factor_Treatment_HT1080_DMSO_control	HT1080_13-biotin	No	lm
RPS9	sp|P46781|RS9_HUMAN	0.69367	0.39901	0.225582	Factor_Treatment_HT1080_DMSO_control	HT1080_13-biotin	No	lmer
EIF4A1	sp|P60842|IF4A1_HUMAN	0.800515	0.398757	0.225582	Factor_Treatment_HT1080_DMSO_control	HT1080_13-biotin	No	lm
NUP88	sp|Q99567|NUP88_HUMAN	-1.07648	0.403777	0.225582	Factor_Treatment_HT1080_DMSO_control	HT1080_13-biotin	No	lm
HM13	tr|A0A3B3IUB5|A0A3B3IUB5_HUMAN	1.30277	0.401576	0.225582	Factor_Treatment_HT1080_DMSO_control	HT1080_13-biotin	No	lm
MSH6	sp|P52701|MSH6_HUMAN	1.01067	0.405225	0.225582	Factor_Treatment_HT1080_DMSO_control	HT1080_13-biotin	No	lm
ESYT1	sp|Q9BSJ8|ESYT1_HUMAN	1.51578	0.405843	0.225582	Factor_Treatment_HT1080_DMSO_control	HT1080_13-biotin	No	lm
ELAVL1	sp|Q15717|ELAV1_HUMAN	3.88772	0.402883	0.225582	Factor_Treatment_HT1080_DMSO_control	HT1080_13-biotin	No	lm
HSP90B1	sp|P14625|ENPL_HUMAN	1.47794	0.410063	0.225582	Factor_Treatment_HT1080_DMSO_control	HT1080_13-biotin	No	lm
DLST	sp|P36957|ODO2_HUMAN	0.327742	0.394094	0.22266	Factor_Treatment_HT1080_DMSO_control	HT1080_13-biotin	No	lmer
DBT	sp|P11182|ODB2_HUMAN	0.508666	0.392068	0.222368	Factor_Treatment_HT1080_DMSO_control	HT1080_13-biotin	No	lm
TPM4	sp|P67936|TPM4_HUMAN	2.91277	0.385411	0.217437	Factor_Treatment_HT1080_DMSO_control	HT1080_13-biotin	No	lm
VDAC2	sp|P45880|VDAC2_HUMAN	0.96098	0.381203	0.216387	Factor_Treatment_HT1080_DMSO_control	HT1080_13-biotin	No	lmer
RPL23	sp|P62829|RL23_HUMAN	0.713446	0.379875	0.216387	Factor_Treatment_HT1080_DMSO_control	HT1080_13-biotin	No	lm
RPL24	sp|P83731|RL24_HUMAN	0.954813	0.37922	0.216387	Factor_Treatment_HT1080_DMSO_control	HT1080_13-biotin	No	lm
NME1-NME2	tr|Q32Q12|Q32Q12_HUMAN	0.798145	0.365774	0.208067	Factor_Treatment_HT1080_DMSO_control	HT1080_13-biotin	No	lm
RPL11	sp|P62913|RL11_HUMAN	2.46242	0.367602	0.208067	Factor_Treatment_HT1080_DMSO_control	HT1080_13-biotin	No	lm
RPL10A	sp|P62906|RL10A_HUMAN	2.99247	0.364141	0.208067	Factor_Treatment_HT1080_DMSO_control	HT1080_13-biotin	No	lm
FAM83H	tr|A0A494C1T9|A0A494C1T9_HUMAN	1.06374	0.366272	0.208067	Factor_Treatment_HT1080_DMSO_control	HT1080_13-biotin	No	lmer
PSMC1	sp|P62191|PRS4_HUMAN	0.757648	0.361744	0.207344	Factor_Treatment_HT1080_DMSO_control	HT1080_13-biotin	No	lm
HNRNPM	sp|P52272|HNRPM_HUMAN	2.18151	0.35553	0.202797	Factor_Treatment_HT1080_DMSO_control	HT1080_13-biotin	No	lm
EIF2S1	sp|P05198|IF2A_HUMAN	-3.92289	0.334818	0.192574	Factor_Treatment_HT1080_DMSO_control	HT1080_13-biotin	No	lm
NXN	sp|Q6DKJ4|NXN_HUMAN	1.65431	0.338416	0.192574	Factor_Treatment_HT1080_DMSO_control	HT1080_13-biotin	No	lm
RPLP1	sp|P05386|RLA1_HUMAN	2.39191	0.341196	0.192574	Factor_Treatment_HT1080_DMSO_control	HT1080_13-biotin	No	lm
SEPTIN9	sp|Q9UHD8|SEPT9_HUMAN	1.46662	0.334073	0.192574	Factor_Treatment_HT1080_DMSO_control	HT1080_13-biotin	No	lm
RPL17-C18orf32	tr|A0A0A6YYL6|A0A0A6YYL6_HUMAN	1.40294	0.333813	0.192574	Factor_Treatment_HT1080_DMSO_control	HT1080_13-biotin	No	lm
PAWR	sp|Q96IZ0|PAWR_HUMAN	2.50689	0.336636	0.192574	Factor_Treatment_HT1080_DMSO_control	HT1080_13-biotin	No	lm
YWHAE	sp|P62258|1433E_HUMAN	1.37136	0.341608	0.192574	Factor_Treatment_HT1080_DMSO_control	HT1080_13-biotin	No	lm
CTNNB1	tr|A0A2R8Y5A3|A0A2R8Y5A3_HUMAN	0.947943	0.319294	0.184591	Factor_Treatment_HT1080_DMSO_control	HT1080_13-biotin	No	lm
	tr|F5H423|F5H423_HUMAN	1.34401	0.323671	0.184591	Factor_Treatment_HT1080_DMSO_control	HT1080_13-biotin	No	lm
RPL4	sp|P36578|RL4_HUMAN	1.2281	0.321717	0.184591	Factor_Treatment_HT1080_DMSO_control	HT1080_13-biotin	No	lm
H2AX	sp|P16104|H2AX_HUMAN	0.762879	0.320134	0.184591	Factor_Treatment_HT1080_DMSO_control	HT1080_13-biotin	No	lm
MYL12A	tr|J3QRS3|J3QRS3_HUMAN	1.23587	0.314632	0.184591	Factor_Treatment_HT1080_DMSO_control	HT1080_13-biotin	No	lm
TMX1	sp|Q9H3N1|TMX1_HUMAN	1.29373	0.315197	0.184591	Factor_Treatment_HT1080_DMSO_control	HT1080_13-biotin	No	lm
LUC7L2	tr|A0A0A6YYJ8|A0A0A6YYJ8_HUMAN	0.521138	0.31581	0.184591	Factor_Treatment_HT1080_DMSO_control	HT1080_13-biotin	No	lm
TPM1	tr|B7Z596|B7Z596_HUMAN	1.99383	0.31078	0.18289	Factor_Treatment_HT1080_DMSO_control	HT1080_13-biotin	No	lm
RBM14	sp|Q96PK6|RBM14_HUMAN	0.942434	0.307333	0.18289	Factor_Treatment_HT1080_DMSO_control	HT1080_13-biotin	No	lm
RPL23A	tr|A8MUS3|A8MUS3_HUMAN	1.27054	0.30666	0.18289	Factor_Treatment_HT1080_DMSO_control	HT1080_13-biotin	No	lm
VCP	sp|P55072|TERA_HUMAN	1.13993	0.306746	0.18289	Factor_Treatment_HT1080_DMSO_control	HT1080_13-biotin	No	lm
YWHAZ	sp|P63104|1433Z_HUMAN	1.63536	0.304717	0.182501	Factor_Treatment_HT1080_DMSO_control	HT1080_13-biotin	No	lm
RPL18A	sp|Q02543|RL18A_HUMAN	1.39918	0.2988	0.178132	Factor_Treatment_HT1080_DMSO_control	HT1080_13-biotin	No	lm
RAI14	sp|Q9P0K7|RAI14_HUMAN	1.00529	0.288168	0.169043	Factor_Treatment_HT1080_DMSO_control	HT1080_13-biotin	No	lmer
HSPB1	sp|P04792|HSPB1_HUMAN	-0.561096	0.282922	0.165335	Factor_Treatment_HT1080_DMSO_control	HT1080_13-biotin	No	lmer
ILF2	sp|Q12905|ILF2_HUMAN	1.98614	0.276051	0.163043	Factor_Treatment_HT1080_DMSO_control	HT1080_13-biotin	No	lm
PCCB	tr|E7EX59|E7EX59_HUMAN	-0.153131	0.27787	0.163043	Factor_Treatment_HT1080_DMSO_control	HT1080_13-biotin	No	lmer
MTOR	sp|P42345|MTOR_HUMAN	1.54022	0.276114	0.163043	Factor_Treatment_HT1080_DMSO_control	HT1080_13-biotin	No	lm
SELENOK	sp|Q9Y6D0|SELK_HUMAN	1.89553	0.273954	0.162462	Factor_Treatment_HT1080_DMSO_control	HT1080_13-biotin	No	lm
DSTN	sp|P60981|DEST_HUMAN	1.63612	0.268477	0.158495	Factor_Treatment_HT1080_DMSO_control	HT1080_13-biotin	No	lm
PCCA	sp|P05165|PCCA_HUMAN	-0.152609	0.259799	0.152823	Factor_Treatment_HT1080_DMSO_control	HT1080_13-biotin	No	lmer
H4C1	sp|P62805|H4_HUMAN	0.918531	0.261085	0.152823	Factor_Treatment_HT1080_DMSO_control	HT1080_13-biotin	No	lm
MBOAT7	sp|Q96N66|MBOA7_HUMAN	0.628663	0.255752	0.151761	Factor_Treatment_HT1080_DMSO_control	HT1080_13-biotin	No	lm
CAPZB	tr|B1AK88|B1AK88_HUMAN	1.48698	0.256883	0.151761	Factor_Treatment_HT1080_DMSO_control	HT1080_13-biotin	No	lm
PPFIBP1	sp|Q86W92|LIPB1_HUMAN	0.548634	0.245605	0.150448	Factor_Treatment_HT1080_DMSO_control	HT1080_13-biotin	No	lm
RPL13	sp|P26373|RL13_HUMAN	1.10089	0.246302	0.150448	Factor_Treatment_HT1080_DMSO_control	HT1080_13-biotin	No	lm
CFL1	tr|E9PK25|E9PK25_HUMAN	2.13932	0.250923	0.150448	Factor_Treatment_HT1080_DMSO_control	HT1080_13-biotin	No	lm
GNB2	sp|P62879|GBB2_HUMAN	2.09802	0.248413	0.150448	Factor_Treatment_HT1080_DMSO_control	HT1080_13-biotin	No	lm
RPS3A	sp|P61247|RS3A_HUMAN	1.65913	0.252402	0.150448	Factor_Treatment_HT1080_DMSO_control	HT1080_13-biotin	No	lm
CLTC	tr|A0A087WVQ6|A0A087WVQ6_HUMAN	0.901763	0.248874	0.150448	Factor_Treatment_HT1080_DMSO_control	HT1080_13-biotin	No	lmer
LRRC59	sp|Q96AG4|LRC59_HUMAN	0.785347	0.235821	0.142118	Factor_Treatment_HT1080_DMSO_control	HT1080_13-biotin	No	lm
FKBP8	sp|Q14318|FKBP8_HUMAN	1.74012	0.234045	0.141822	Factor_Treatment_HT1080_DMSO_control	HT1080_13-biotin	No	lm
RPS7	sp|P62081|RS7_HUMAN	1.1616	0.232629	0.141822	Factor_Treatment_HT1080_DMSO_control	HT1080_13-biotin	No	lm
CD59	sp|P13987|CD59_HUMAN	1.40344	0.230024	0.140657	Factor_Treatment_HT1080_DMSO_control	HT1080_13-biotin	No	lm
PKM	sp|P14618|KPYM_HUMAN	1.18333	0.21834	0.130409	Factor_Treatment_HT1080_DMSO_control	HT1080_13-biotin	No	lm
RPL3	sp|P39023|RL3_HUMAN	0.956577	0.213406	0.126906	Factor_Treatment_HT1080_DMSO_control	HT1080_13-biotin	No	lm
CLTB	sp|P09497|CLCB_HUMAN	0.887633	0.200116	0.116251	Factor_Treatment_HT1080_DMSO_control	HT1080_13-biotin	No	lmer
RAE1	tr|E9PQ57|E9PQ57_HUMAN	-1.52595	0.199903	0.116251	Factor_Treatment_HT1080_DMSO_control	HT1080_13-biotin	No	lm
HNRNPA2B1	sp|P22626|ROA2_HUMAN	0.594884	0.197594	0.11592	Factor_Treatment_HT1080_DMSO_control	HT1080_13-biotin	No	lm
FXR1	sp|P51114|FXR1_HUMAN	1.21804	0.196743	0.11592	Factor_Treatment_HT1080_DMSO_control	HT1080_13-biotin	No	lm
	tr|A0A0U1RRH7|A0A0U1RRH7_HUMAN	-0.833905	0.191954	0.112538	Factor_Treatment_HT1080_DMSO_control	HT1080_13-biotin	No	lm
RTN4	sp|Q9NQC3|RTN4_HUMAN	1.40735	0.183351	0.112288	Factor_Treatment_HT1080_DMSO_control	HT1080_13-biotin	No	lm
DNAJB11	sp|Q9UBS4|DJB11_HUMAN	0.206637	0.187273	0.112288	Factor_Treatment_HT1080_DMSO_control	HT1080_13-biotin	No	lm
RPL31	sp|P62899|RL31_HUMAN	0.92174	0.183364	0.112288	Factor_Treatment_HT1080_DMSO_control	HT1080_13-biotin	No	lm
SFPQ	sp|P23246|SFPQ_HUMAN	1.67919	0.185319	0.112288	Factor_Treatment_HT1080_DMSO_control	HT1080_13-biotin	No	lm
	tr|J3KR12|J3KR12_HUMAN	1.05842	0.183628	0.112288	Factor_Treatment_HT1080_DMSO_control	HT1080_13-biotin	No	lm
LARP1	sp|Q6PKG0|LARP1_HUMAN	1.56222	0.188624	0.112288	Factor_Treatment_HT1080_DMSO_control	HT1080_13-biotin	No	lm
ACACB	sp|O00763|ACACB_HUMAN	-0.0983255	0.174136	0.104449	Factor_Treatment_HT1080_DMSO_control	HT1080_13-biotin	No	lmer
BOLA2-SMG1P6	tr|H3BVE0|H3BVE0_HUMAN	0.57789	0.172582	0.104267	Factor_Treatment_HT1080_DMSO_control	HT1080_13-biotin	No	lm
MCCC1	sp|Q96RQ3|MCCA_HUMAN	-0.141241	0.167871	0.100924	Factor_Treatment_HT1080_DMSO_control	HT1080_13-biotin	No	lmer
RPL7	sp|P18124|RL7_HUMAN	1.40455	0.162548	0.0978217	Factor_Treatment_HT1080_DMSO_control	HT1080_13-biotin	No	lm
RPL38	sp|P63173|RL38_HUMAN	0.537868	0.162046	0.0978217	Factor_Treatment_HT1080_DMSO_control	HT1080_13-biotin	No	lm
FAU	tr|E9PR30|E9PR30_HUMAN	-0.240064	0.159741	0.0968719	Factor_Treatment_HT1080_DMSO_control	HT1080_13-biotin	No	lm
RPS18	sp|P62269|RS18_HUMAN	0.922828	0.157287	0.0957687	Factor_Treatment_HT1080_DMSO_control	HT1080_13-biotin	No	lm
TIMM13	sp|Q9Y5L4|TIM13_HUMAN	1.32089	0.154119	0.09529	Factor_Treatment_HT1080_DMSO_control	HT1080_13-biotin	No	lm
SEC63	sp|Q9UGP8|SEC63_HUMAN	0.178259	0.154627	0.09529	Factor_Treatment_HT1080_DMSO_control	HT1080_13-biotin	No	lmer
RUVBL2	sp|Q9Y230|RUVB2_HUMAN	0.578338	0.151822	0.0943317	Factor_Treatment_HT1080_DMSO_control	HT1080_13-biotin	No	lm
TNFAIP2	sp|Q03169|TNAP2_HUMAN	0.430249	0.148759	0.0939326	Factor_Treatment_HT1080_DMSO_control	HT1080_13-biotin	No	lm
RTRAF	sp|Q9Y224|RTRAF_HUMAN	-1.08458	0.149371	0.0939326	Factor_Treatment_HT1080_DMSO_control	HT1080_13-biotin	No	lm
RPL30	sp|P62888|RL30_HUMAN	1.17052	0.145663	0.0934855	Factor_Treatment_HT1080_DMSO_control	HT1080_13-biotin	No	lm
IGF2R	sp|P11717|MPRI_HUMAN	-0.4411	0.146836	0.0934855	Factor_Treatment_HT1080_DMSO_control	HT1080_13-biotin	No	lm
RPS6	sp|P62753|RS6_HUMAN	0.339571	0.143535	0.092675	Factor_Treatment_HT1080_DMSO_control	HT1080_13-biotin	No	lm
RPL36A	tr|J3KQN4|J3KQN4_HUMAN	0.338214	0.132926	0.0833803	Factor_Treatment_HT1080_DMSO_control	HT1080_13-biotin	No	lm
MCCC2	sp|Q9HCC0|MCCB_HUMAN	-0.108071	0.131111	0.0828753	Factor_Treatment_HT1080_DMSO_control	HT1080_13-biotin	No	lmer
PPP2R1B	sp|P30154|2AAB_HUMAN	0.941578	0.122467	0.0755369	Factor_Treatment_HT1080_DMSO_control	HT1080_13-biotin	No	lm
RPS2	sp|P15880|RS2_HUMAN	0.617736	0.11906	0.0734323	Factor_Treatment_HT1080_DMSO_control	HT1080_13-biotin	No	lm
LGALS1	sp|P09382|LEG1_HUMAN	0.604401	0.117727	0.0733974	Factor_Treatment_HT1080_DMSO_control	HT1080_13-biotin	No	lm
XIAP	sp|P98170|XIAP_HUMAN	0.211289	0.115455	0.0724204	Factor_Treatment_HT1080_DMSO_control	HT1080_13-biotin	No	lm
PTBP1	tr|A0A0U1RRM4|A0A0U1RRM4_HUMAN	0.47432	0.112638	0.0708945	Factor_Treatment_HT1080_DMSO_control	HT1080_13-biotin	No	lm
RPS8	sp|P62241|RS8_HUMAN	0.472286	0.109802	0.0693448	Factor_Treatment_HT1080_DMSO_control	HT1080_13-biotin	No	lm
RPS14	sp|P62263|RS14_HUMAN	0.518799	0.10565	0.0677554	Factor_Treatment_HT1080_DMSO_control	HT1080_13-biotin	No	lm
NCL	sp|P19338|NUCL_HUMAN	1.04641	0.106838	0.0677554	Factor_Treatment_HT1080_DMSO_control	HT1080_13-biotin	No	lm
RPLP2	sp|P05387|RLA2_HUMAN	1.29962	0.102399	0.0670511	Factor_Treatment_HT1080_DMSO_control	HT1080_13-biotin	No	lm
EFEMP1	sp|Q12805|FBLN3_HUMAN	-1.04365	0.102423	0.0670511	Factor_Treatment_HT1080_DMSO_control	HT1080_13-biotin	No	lm
TMPO	sp|P42167|LAP2B_HUMAN	0.34482	0.0947025	0.0606227	Factor_Treatment_HT1080_DMSO_control	HT1080_13-biotin	No	lm
RPL27A	sp|P46776|RL27A_HUMAN	0.29602	0.0891129	0.0562975	Factor_Treatment_HT1080_DMSO_control	HT1080_13-biotin	No	lm
CORO1C	sp|Q9ULV4|COR1C_HUMAN	0.355512	0.0738182	0.0422634	Factor_Treatment_HT1080_DMSO_control	HT1080_13-biotin	No	lm
YWHAQ	sp|P27348|1433T_HUMAN	0.966765	0.0710841	0.0407863	Factor_Treatment_HT1080_DMSO_control	HT1080_13-biotin	No	lm
SUB1	sp|P53999|TCP4_HUMAN	-0.277034	0.0639386	0.036144	Factor_Treatment_HT1080_DMSO_control	HT1080_13-biotin	No	lm
RPS13	sp|P62277|RS13_HUMAN	-0.451219	0.0639871	0.036144	Factor_Treatment_HT1080_DMSO_control	HT1080_13-biotin	No	lm
LDHA	sp|P00338|LDHA_HUMAN	0.141071	0.0611755	0.034627	Factor_Treatment_HT1080_DMSO_control	HT1080_13-biotin	No	lm
OGDH	tr|E9PCR7|E9PCR7_HUMAN	0.100451	0.0544521	0.0291462	Factor_Treatment_HT1080_DMSO_control	HT1080_13-biotin	No	lm
CAV1	sp|Q03135|CAV1_HUMAN	0.713304	0.0473865	0.0233197	Factor_Treatment_HT1080_DMSO_control	HT1080_13-biotin	No	lm
RBM39	sp|Q14498|RBM39_HUMAN	0.0552797	0.0378968	0.0169925	Factor_Treatment_HT1080_DMSO_control	HT1080_13-biotin	No	lm
ECH1	sp|Q13011|ECH1_HUMAN	0.0671121	0.0371005	0.0169925	Factor_Treatment_HT1080_DMSO_control	HT1080_13-biotin	No	lm
CCT5	sp|P48643|TCPE_HUMAN	0.104254	0.0356246	0.0169925	Factor_Treatment_HT1080_DMSO_control	HT1080_13-biotin	No	lm
RPL37	sp|P61927|RL37_HUMAN	-0.119063	0.0380502	0.0169925	Factor_Treatment_HT1080_DMSO_control	HT1080_13-biotin	No	lm
MSH2	tr|A0A2R8YG02|A0A2R8YG02_HUMAN	-0.359816	0.0349164	0.0169925	Factor_Treatment_HT1080_DMSO_control	HT1080_13-biotin	No	lm
GAPDH	sp|P04406|G3P_HUMAN	-0.585056	0.0305375	0.0141397	Factor_Treatment_HT1080_DMSO_control	HT1080_13-biotin	No	lm
MARCKS	sp|P29966|MARCS_HUMAN	-0.198079	0.0294012	0.0141397	Factor_Treatment_HT1080_DMSO_control	HT1080_13-biotin	No	lm
COL17A1	sp|Q9UMD9|COHA1_HUMAN	0.376204	0.0284191	0.0141397	Factor_Treatment_HT1080_DMSO_control	HT1080_13-biotin	No	lm
CAVIN1	sp|Q6NZI2|CAVN1_HUMAN	0.124946	0.0186712	0.00559977	Factor_Treatment_HT1080_DMSO_control	HT1080_13-biotin	No	lm
PKP2	sp|Q99959|PKP2_HUMAN	-0.196969	0.0169894	0.00512269	Factor_Treatment_HT1080_DMSO_control	HT1080_13-biotin	No	lm
RPS5	sp|P46782|RS5_HUMAN	0.215744	0.0148763	0.00421098	Factor_Treatment_HT1080_DMSO_control	HT1080_13-biotin	No	lm
ARL1	tr|F8VYN9|F8VYN9_HUMAN	0.0525677	0.0125744	0.00310715	Factor_Treatment_HT1080_DMSO_control	HT1080_13-biotin	No	lm
GOLGB1	sp|Q14789|GOGB1_HUMAN	-0.0511812	0.00879568	0.00263978	Factor_Treatment_HT1080_DMSO_control	HT1080_13-biotin	No	lm
CLTA	sp|P09496|CLCA_HUMAN	-0.149067	0.00917198	0.00263978	Factor_Treatment_HT1080_DMSO_control	HT1080_13-biotin	No	lm
RPS23	sp|P62266|RS23_HUMAN	-0.0148569	0.00616587	0.00263978	Factor_Treatment_HT1080_DMSO_control	HT1080_13-biotin	No	lm
SEC16A	sp|O15027|SC16A_HUMAN	0.0613415	0.00640388	0.00263978	Factor_Treatment_HT1080_DMSO_control	HT1080_13-biotin	No	lm
LSM14A	sp|Q8ND56|LS14A_HUMAN	0.0173923	0.00805449	0.00263978	Factor_Treatment_HT1080_DMSO_control	HT1080_13-biotin	No	lm
PKP3	sp|Q9Y446|PKP3_HUMAN	0.0404465	0.00341949	0.00107195	Factor_Treatment_HT1080_DMSO_control	HT1080_13-biotin	No	lm
RACK1	tr|D6REE5|D6REE5_HUMAN	-0.004262	0.00208676	0.000914572	Factor_Treatment_HT1080_DMSO_control	HT1080_13-biotin	No	lm
CAPRIN1	sp|Q14444|CAPR1_HUMAN	-0.0098288	0.00090059	0.00090059	Factor_Treatment_HT1080_DMSO_control	HT1080_13-biotin	No	lm

## Sheet: HT1080 DMSO vs. 13-3L3A-bio
Gene	Protein	Est_Fc	Pval	Qval	Reference_condition	Comparision_condition	Is_outlier	modelFit
SEC63	sp|Q9UGP8|SEC63_HUMAN	5.87835	37.6616	35.0922	Factor_Treatment_HT1080_DMSO_control	HT1080_13-3L3A-biotin	No	lmer
ATP2A2	sp|P16615|AT2A2_HUMAN	5.34557	22.2362	20.049	Factor_Treatment_HT1080_DMSO_control	HT1080_13-3L3A-biotin	No	lmer
PRKDC	sp|P78527|PRKDC_HUMAN	4.81466	22.1412	20.049	Factor_Treatment_HT1080_DMSO_control	HT1080_13-3L3A-biotin	No	lmer
TUBA1C	tr|F5H5D3|F5H5D3_HUMAN	4.66388	19.9941	18.0268	Factor_Treatment_HT1080_DMSO_control	HT1080_13-3L3A-biotin	No	lmer
TUBB2A	sp|Q13885|TBB2A_HUMAN	4.15372	18.9407	17.0703	Factor_Treatment_HT1080_DMSO_control	HT1080_13-3L3A-biotin	No	lmer
SLC16A3	sp|O15427|MOT4_HUMAN	4.67328	16.8176	15.0264	Factor_Treatment_HT1080_DMSO_control	HT1080_13-3L3A-biotin	No	lm
PCCB	tr|E7EX59|E7EX59_HUMAN	-2.48299	15.236	13.5117	Factor_Treatment_HT1080_DMSO_control	HT1080_13-3L3A-biotin	No	lmer
DLST	sp|P36957|ODO2_HUMAN	3.01822	14.5872	12.9209	Factor_Treatment_HT1080_DMSO_control	HT1080_13-3L3A-biotin	No	lmer
TUBB6	sp|Q9BUF5|TBB6_HUMAN	4.27332	14.4155	12.8003	Factor_Treatment_HT1080_DMSO_control	HT1080_13-3L3A-biotin	No	lmer
MYH9	sp|P35579|MYH9_HUMAN	4.38044	14.2701	12.7007	Factor_Treatment_HT1080_DMSO_control	HT1080_13-3L3A-biotin	No	lmer
GLRX3	sp|O76003|GLRX3_HUMAN	6.22938	13.0252	11.4972	Factor_Treatment_HT1080_DMSO_control	HT1080_13-3L3A-biotin	No	lmer
SLC7A5	sp|Q01650|LAT1_HUMAN	3.63843	12.4889	10.9987	Factor_Treatment_HT1080_DMSO_control	HT1080_13-3L3A-biotin	No	lmer
UGGT1	sp|Q9NYU2|UGGG1_HUMAN	4.68155	12.1653	10.7098	Factor_Treatment_HT1080_DMSO_control	HT1080_13-3L3A-biotin	No	lmer
P4HB	sp|P07237|PDIA1_HUMAN	4.0199	11.9708	10.5475	Factor_Treatment_HT1080_DMSO_control	HT1080_13-3L3A-biotin	No	lmer
AIFM1	sp|O95831|AIFM1_HUMAN	4.06598	9.54077	8.14749	Factor_Treatment_HT1080_DMSO_control	HT1080_13-3L3A-biotin	No	lm
HSPA8	sp|P11142|HSP7C_HUMAN	2.89107	9.10069	7.73543	Factor_Treatment_HT1080_DMSO_control	HT1080_13-3L3A-biotin	No	lmer
MYH10	sp|P35580|MYH10_HUMAN	3.24333	8.94289	7.60396	Factor_Treatment_HT1080_DMSO_control	HT1080_13-3L3A-biotin	No	lmer
PFKP	sp|Q01813|PFKAP_HUMAN	4.59584	8.49776	7.18366	Factor_Treatment_HT1080_DMSO_control	HT1080_13-3L3A-biotin	No	lm
SLC3A2	tr|J3KPF3|J3KPF3_HUMAN	3.0247	7.99301	6.70239	Factor_Treatment_HT1080_DMSO_control	HT1080_13-3L3A-biotin	No	lmer
HSPA1B	tr|A0A0G2JIW1|A0A0G2JIW1_HUMAN	3.49256	7.40381	6.13547	Factor_Treatment_HT1080_DMSO_control	HT1080_13-3L3A-biotin	No	lmer
HSPA5	sp|P11021|BIP_HUMAN	3.73847	7.20859	5.96144	Factor_Treatment_HT1080_DMSO_control	HT1080_13-3L3A-biotin	No	lmer
BZW1	sp|Q7L1Q6|BZW1_HUMAN	6.23026	6.97833	5.77069	Factor_Treatment_HT1080_DMSO_control	HT1080_13-3L3A-biotin	No	lm
CALU	sp|O43852|CALU_HUMAN	3.62768	6.98717	5.77069	Factor_Treatment_HT1080_DMSO_control	HT1080_13-3L3A-biotin	No	lmer
ACACA	sp|Q13085|ACACA_HUMAN	-1.27503	6.89888	5.71579	Factor_Treatment_HT1080_DMSO_control	HT1080_13-3L3A-biotin	No	lmer
PCCA	sp|P05165|PCCA_HUMAN	-1.54629	6.88722	5.71579	Factor_Treatment_HT1080_DMSO_control	HT1080_13-3L3A-biotin	No	lmer
MAP1B	sp|P46821|MAP1B_HUMAN	4.32619	6.73798	5.58358	Factor_Treatment_HT1080_DMSO_control	HT1080_13-3L3A-biotin	No	lm
ASPH	sp|Q12797|ASPH_HUMAN	4.88252	6.51343	5.37542	Factor_Treatment_HT1080_DMSO_control	HT1080_13-3L3A-biotin	No	lmer
XPO1	sp|O14980|XPO1_HUMAN	4.8273	6.38124	5.25902	Factor_Treatment_HT1080_DMSO_control	HT1080_13-3L3A-biotin	No	lmer
CAND1	sp|Q86VP6|CAND1_HUMAN	4.73666	6.27424	5.16727	Factor_Treatment_HT1080_DMSO_control	HT1080_13-3L3A-biotin	No	lmer
CAD	sp|P27708|PYR1_HUMAN	3.04259	6.21983	5.12758	Factor_Treatment_HT1080_DMSO_control	HT1080_13-3L3A-biotin	No	lmer
DYNC1H1	sp|Q14204|DYHC1_HUMAN	3.19803	5.95869	4.8858	Factor_Treatment_HT1080_DMSO_control	HT1080_13-3L3A-biotin	No	lmer
AHNAK	sp|Q09666|AHNK_HUMAN	3.41648	5.95002	4.8858	Factor_Treatment_HT1080_DMSO_control	HT1080_13-3L3A-biotin	No	lmer
COPB1	sp|P53618|COPB_HUMAN	5.38766	5.91247	4.86161	Factor_Treatment_HT1080_DMSO_control	HT1080_13-3L3A-biotin	No	lm
PC	sp|P11498|PYC_HUMAN	-1.65414	5.83298	4.79509	Factor_Treatment_HT1080_DMSO_control	HT1080_13-3L3A-biotin	No	lmer
TXN	sp|P10599|THIO_HUMAN	5.61908	5.5827	4.5574	Factor_Treatment_HT1080_DMSO_control	HT1080_13-3L3A-biotin	No	lm
CSE1L	sp|P55060|XPO2_HUMAN	5.7785	5.52443	4.51136	Factor_Treatment_HT1080_DMSO_control	HT1080_13-3L3A-biotin	No	lm
EEF1A1	sp|P68104|EF1A1_HUMAN	3.14008	5.32406	4.32289	Factor_Treatment_HT1080_DMSO_control	HT1080_13-3L3A-biotin	No	lmer
CANX	sp|P27824|CALX_HUMAN	2.98163	5.15924	4.16965	Factor_Treatment_HT1080_DMSO_control	HT1080_13-3L3A-biotin	No	lm
MAGED2	sp|Q9UNF1|MAGD2_HUMAN	5.15694	5.10283	4.12452	Factor_Treatment_HT1080_DMSO_control	HT1080_13-3L3A-biotin	No	lm
KPNB1	sp|Q14974|IMB1_HUMAN	5.54496	5.05483	4.08751	Factor_Treatment_HT1080_DMSO_control	HT1080_13-3L3A-biotin	No	lmer
SELENOF	sp|O60613|SEP15_HUMAN	3.6437	5.02994	4.07335	Factor_Treatment_HT1080_DMSO_control	HT1080_13-3L3A-biotin	No	lm
GCN1	sp|Q92616|GCN1_HUMAN	5.00226	4.93449	3.98837	Factor_Treatment_HT1080_DMSO_control	HT1080_13-3L3A-biotin	No	lmer
ELOVL1	sp|Q9BW60|ELOV1_HUMAN	3.49962	4.90789	3.97199	Factor_Treatment_HT1080_DMSO_control	HT1080_13-3L3A-biotin	No	lm
ACTG1	sp|P63261|ACTG_HUMAN	2.67293	4.87654	3.95062	Factor_Treatment_HT1080_DMSO_control	HT1080_13-3L3A-biotin	No	lmer
HSPA9	sp|P38646|GRP75_HUMAN	3.34816	4.81701	3.90085	Factor_Treatment_HT1080_DMSO_control	HT1080_13-3L3A-biotin	No	lmer
TUBA1A	sp|Q71U36|TBA1A_HUMAN	3.03946	4.62374	3.71713	Factor_Treatment_HT1080_DMSO_control	HT1080_13-3L3A-biotin	No	lm
ALG1	sp|Q9BT22|ALG1_HUMAN	7.73431	4.5793	3.68203	Factor_Treatment_HT1080_DMSO_control	HT1080_13-3L3A-biotin	No	lm
XPOT	sp|O43592|XPOT_HUMAN	4.2314	4.51251	3.6407	Factor_Treatment_HT1080_DMSO_control	HT1080_13-3L3A-biotin	No	lm
RCN2	sp|Q14257|RCN2_HUMAN	3.98758	4.51111	3.6407	Factor_Treatment_HT1080_DMSO_control	HT1080_13-3L3A-biotin	No	lmer
HSPD1	sp|P10809|CH60_HUMAN	3.8112	4.51717	3.6407	Factor_Treatment_HT1080_DMSO_control	HT1080_13-3L3A-biotin	No	lmer
PCBP2	sp|Q15366|PCBP2_HUMAN	4.27247	4.37016	3.50835	Factor_Treatment_HT1080_DMSO_control	HT1080_13-3L3A-biotin	No	lm
SSBP1	sp|Q04837|SSBP_HUMAN	4.3802	4.33461	3.48951	Factor_Treatment_HT1080_DMSO_control	HT1080_13-3L3A-biotin	No	lm
SLC25A5	sp|P05141|ADT2_HUMAN	2.32682	4.34086	3.48951	Factor_Treatment_HT1080_DMSO_control	HT1080_13-3L3A-biotin	No	lm
SLC25A3	sp|Q00325|MPCP_HUMAN	2.93545	4.26386	3.42688	Factor_Treatment_HT1080_DMSO_control	HT1080_13-3L3A-biotin	No	lm
EEF2	sp|P13639|EF2_HUMAN	4.31973	4.21624	3.38723	Factor_Treatment_HT1080_DMSO_control	HT1080_13-3L3A-biotin	No	lmer
SEC13	sp|P55735|SEC13_HUMAN	3.84524	4.16657	3.34538	Factor_Treatment_HT1080_DMSO_control	HT1080_13-3L3A-biotin	No	lm
PHGDH	sp|O43175|SERA_HUMAN	3.22008	4.06867	3.25517	Factor_Treatment_HT1080_DMSO_control	HT1080_13-3L3A-biotin	No	lmer
GSN	sp|P06396|GELS_HUMAN	4.94724	4.02203	3.21608	Factor_Treatment_HT1080_DMSO_control	HT1080_13-3L3A-biotin	No	lm
TUBB	sp|P07437|TBB5_HUMAN	4.18881	3.92452	3.126	Factor_Treatment_HT1080_DMSO_control	HT1080_13-3L3A-biotin	No	lmer
TUBA4A	sp|P68366|TBA4A_HUMAN	4.57009	3.88263	3.09141	Factor_Treatment_HT1080_DMSO_control	HT1080_13-3L3A-biotin	No	lm
RCN1	sp|Q15293|RCN1_HUMAN	5.65421	3.79537	3.01572	Factor_Treatment_HT1080_DMSO_control	HT1080_13-3L3A-biotin	No	lm
TUBB4B	sp|P68371|TBB4B_HUMAN	2.64898	3.79271	3.01572	Factor_Treatment_HT1080_DMSO_control	HT1080_13-3L3A-biotin	No	lmer
VAC14	sp|Q08AM6|VAC14_HUMAN	3.4261	3.65422	2.88418	Factor_Treatment_HT1080_DMSO_control	HT1080_13-3L3A-biotin	No	lm
EGFR	sp|P00533|EGFR_HUMAN	2.39666	3.62852	2.86533	Factor_Treatment_HT1080_DMSO_control	HT1080_13-3L3A-biotin	No	lm
HSD17B12	sp|Q53GQ0|DHB12_HUMAN	3.21076	3.60276	2.84629	Factor_Treatment_HT1080_DMSO_control	HT1080_13-3L3A-biotin	No	lm
TXNRD1	sp|Q16881|TRXR1_HUMAN	3.78524	3.53625	2.78642	Factor_Treatment_HT1080_DMSO_control	HT1080_13-3L3A-biotin	No	lmer
RPN1	sp|P04843|RPN1_HUMAN	4.42732	3.50073	2.75743	Factor_Treatment_HT1080_DMSO_control	HT1080_13-3L3A-biotin	No	lmer
LTN1	sp|O94822|LTN1_HUMAN	3.47171	3.46596	2.7291	Factor_Treatment_HT1080_DMSO_control	HT1080_13-3L3A-biotin	No	lm
IPO7	sp|O95373|IPO7_HUMAN	5.63681	3.45234	2.72182	Factor_Treatment_HT1080_DMSO_control	HT1080_13-3L3A-biotin	No	lmer
ACLY	sp|P53396|ACLY_HUMAN	8.58465	3.44396	2.71968	Factor_Treatment_HT1080_DMSO_control	HT1080_13-3L3A-biotin	No	lm
TOR1AIP2	sp|Q8NFQ8|TOIP2_HUMAN	4.19442	3.42399	2.70587	Factor_Treatment_HT1080_DMSO_control	HT1080_13-3L3A-biotin	No	lm
CCN2	sp|P29279|CCN2_HUMAN	6.28495	3.41485	2.70281	Factor_Treatment_HT1080_DMSO_control	HT1080_13-3L3A-biotin	No	lm
ATP5F1A	sp|P25705|ATPA_HUMAN	2.40634	3.27356	2.5675	Factor_Treatment_HT1080_DMSO_control	HT1080_13-3L3A-biotin	No	lmer
HSP90AB1	sp|P08238|HS90B_HUMAN	3.55189	3.23588	2.53574	Factor_Treatment_HT1080_DMSO_control	HT1080_13-3L3A-biotin	No	lmer
SPTLC2	sp|O15270|SPTC2_HUMAN	3.99525	3.19926	2.50495	Factor_Treatment_HT1080_DMSO_control	HT1080_13-3L3A-biotin	No	lm
MCCC2	sp|Q9HCC0|MCCB_HUMAN	-1.17088	3.16158	2.47302	Factor_Treatment_HT1080_DMSO_control	HT1080_13-3L3A-biotin	No	lmer
TNPO1	sp|Q92973|TNPO1_HUMAN	4.90177	3.14719	2.4643	Factor_Treatment_HT1080_DMSO_control	HT1080_13-3L3A-biotin	No	lmer
ATL3	sp|Q6DD88|ATLA3_HUMAN	3.63352	3.1144	2.43712	Factor_Treatment_HT1080_DMSO_control	HT1080_13-3L3A-biotin	No	lm
TECR	tr|M0R2N5|M0R2N5_HUMAN	3.54068	3.09025	2.4185	Factor_Treatment_HT1080_DMSO_control	HT1080_13-3L3A-biotin	No	lm
GEMIN4	sp|P57678|GEMI4_HUMAN	4.15774	3.05664	2.39036	Factor_Treatment_HT1080_DMSO_control	HT1080_13-3L3A-biotin	No	lmer
ACTA2	sp|P62736|ACTA_HUMAN	3.21456	3.00158	2.35086	Factor_Treatment_HT1080_DMSO_control	HT1080_13-3L3A-biotin	No	lmer
LDHA	sp|P00338|LDHA_HUMAN	2.52147	3.00116	2.35086	Factor_Treatment_HT1080_DMSO_control	HT1080_13-3L3A-biotin	No	lm
PSMC1	sp|P62191|PRS4_HUMAN	3.08685	3.00296	2.35086	Factor_Treatment_HT1080_DMSO_control	HT1080_13-3L3A-biotin	No	lm
TMEM165	sp|Q9HC07|TM165_HUMAN	8.02673	2.98711	2.34202	Factor_Treatment_HT1080_DMSO_control	HT1080_13-3L3A-biotin	No	lm
TUBA3D	sp|P0DPH8|TBA3D_HUMAN	4.53715	2.97809	2.33813	Factor_Treatment_HT1080_DMSO_control	HT1080_13-3L3A-biotin	No	lm
ARFGEF1	sp|Q9Y6D6|BIG1_HUMAN	4.78053	2.87776	2.24288	Factor_Treatment_HT1080_DMSO_control	HT1080_13-3L3A-biotin	No	lmer
CDK1	sp|P06493|CDK1_HUMAN	3.33272	2.84874	2.21888	Factor_Treatment_HT1080_DMSO_control	HT1080_13-3L3A-biotin	No	lm
IPO11	sp|Q9UI26|IPO11_HUMAN	3.33906	2.84338	2.21849	Factor_Treatment_HT1080_DMSO_control	HT1080_13-3L3A-biotin	No	lm
NUP93	tr|H3BVG0|H3BVG0_HUMAN	2.92475	2.82876	2.20878	Factor_Treatment_HT1080_DMSO_control	HT1080_13-3L3A-biotin	No	lm
HNRNPK	sp|P61978|HNRPK_HUMAN	4.05775	2.81188	2.19675	Factor_Treatment_HT1080_DMSO_control	HT1080_13-3L3A-biotin	No	lmer
TPM3	tr|A0A087WWU8|A0A087WWU8_HUMAN	4.13382	2.7382	2.12787	Factor_Treatment_HT1080_DMSO_control	HT1080_13-3L3A-biotin	No	lm
THBS1	sp|P07996|TSP1_HUMAN	6.22021	2.73346	2.12787	Factor_Treatment_HT1080_DMSO_control	HT1080_13-3L3A-biotin	No	lm
FLNB	sp|O75369|FLNB_HUMAN	2.76756	2.72113	2.12024	Factor_Treatment_HT1080_DMSO_control	HT1080_13-3L3A-biotin	No	lmer
IGF2BP1	sp|Q9NZI8|IF2B1_HUMAN	2.1788	2.71462	2.11837	Factor_Treatment_HT1080_DMSO_control	HT1080_13-3L3A-biotin	No	lm
SEC61A1	tr|B4DR61|B4DR61_HUMAN	2.45149	2.68416	2.09251	Factor_Treatment_HT1080_DMSO_control	HT1080_13-3L3A-biotin	No	lm
SLC16A1	sp|P53985|MOT1_HUMAN	5.53829	2.64725	2.06015	Factor_Treatment_HT1080_DMSO_control	HT1080_13-3L3A-biotin	No	lm
SLC1A5	sp|Q15758|AAAT_HUMAN	4.34393	2.62152	2.04337	Factor_Treatment_HT1080_DMSO_control	HT1080_13-3L3A-biotin	No	lm
NCAPD2	sp|Q15021|CND1_HUMAN	5.8052	2.62168	2.04337	Factor_Treatment_HT1080_DMSO_control	HT1080_13-3L3A-biotin	No	lm
IQGAP3	sp|Q86VI3|IQGA3_HUMAN	4.54282	2.57065	1.99691	Factor_Treatment_HT1080_DMSO_control	HT1080_13-3L3A-biotin	No	lm
DNAJB11	sp|Q9UBS4|DJB11_HUMAN	1.74749	2.55595	1.98657	Factor_Treatment_HT1080_DMSO_control	HT1080_13-3L3A-biotin	No	lm
TPM1	tr|Q6ZN40|Q6ZN40_HUMAN	3.17808	2.49373	1.92868	Factor_Treatment_HT1080_DMSO_control	HT1080_13-3L3A-biotin	No	lmer
BZW2	sp|Q9Y6E2|BZW2_HUMAN	5.69433	2.45856	1.89778	Factor_Treatment_HT1080_DMSO_control	HT1080_13-3L3A-biotin	No	lm
ECPAS	tr|J3KN16|J3KN16_HUMAN	5.26155	2.43184	1.8753	Factor_Treatment_HT1080_DMSO_control	HT1080_13-3L3A-biotin	No	lm
MCCC1	sp|Q96RQ3|MCCA_HUMAN	-1.04617	2.39439	1.84205	Factor_Treatment_HT1080_DMSO_control	HT1080_13-3L3A-biotin	No	lmer
ARL6IP4	sp|Q66PJ3|AR6P4_HUMAN	1.23341	2.38483	1.83664	Factor_Treatment_HT1080_DMSO_control	HT1080_13-3L3A-biotin	No	lm
PPP6R3	sp|Q5H9R7|PP6R3_HUMAN	5.3698	2.36817	1.83222	Factor_Treatment_HT1080_DMSO_control	HT1080_13-3L3A-biotin	No	lm
HEATR1	sp|Q9H583|HEAT1_HUMAN	4.97349	2.37485	1.83222	Factor_Treatment_HT1080_DMSO_control	HT1080_13-3L3A-biotin	No	lm
HSP90AA1	sp|P07900|HS90A_HUMAN	2.43089	2.36844	1.83222	Factor_Treatment_HT1080_DMSO_control	HT1080_13-3L3A-biotin	No	lmer
SCD	sp|O00767|ACOD_HUMAN	2.97751	2.34012	1.81384	Factor_Treatment_HT1080_DMSO_control	HT1080_13-3L3A-biotin	No	lm
PCNA	sp|P12004|PCNA_HUMAN	3.70779	2.34408	1.81384	Factor_Treatment_HT1080_DMSO_control	HT1080_13-3L3A-biotin	No	lm
XPO5	sp|Q9HAV4|XPO5_HUMAN	4.47497	2.3379	1.81384	Factor_Treatment_HT1080_DMSO_control	HT1080_13-3L3A-biotin	No	lm
FLNA	sp|P21333|FLNA_HUMAN	3.35847	2.32922	1.80907	Factor_Treatment_HT1080_DMSO_control	HT1080_13-3L3A-biotin	No	lmer
RPS16	sp|P62249|RS16_HUMAN	1.47048	2.29881	1.78634	Factor_Treatment_HT1080_DMSO_control	HT1080_13-3L3A-biotin	No	lm
SMN1	sp|Q16637|SMN_HUMAN	3.94113	2.30204	1.78634	Factor_Treatment_HT1080_DMSO_control	HT1080_13-3L3A-biotin	No	lm
HACD3	sp|Q9P035|HACD3_HUMAN	8.58543	2.27136	1.77017	Factor_Treatment_HT1080_DMSO_control	HT1080_13-3L3A-biotin	No	lm
CIP2A	tr|A0A087X211|A0A087X211_HUMAN	5.62654	2.27139	1.77017	Factor_Treatment_HT1080_DMSO_control	HT1080_13-3L3A-biotin	No	lm
TXNL1	sp|O43396|TXNL1_HUMAN	5.60785	2.27431	1.77017	Factor_Treatment_HT1080_DMSO_control	HT1080_13-3L3A-biotin	No	lm
XIAP	sp|P98170|XIAP_HUMAN	1.79984	2.26027	1.76278	Factor_Treatment_HT1080_DMSO_control	HT1080_13-3L3A-biotin	No	lm
GOLGB1	sp|Q14789|GOGB1_HUMAN	5.80074	2.22077	1.7381	Factor_Treatment_HT1080_DMSO_control	HT1080_13-3L3A-biotin	No	lm
SQOR	sp|Q9Y6N5|SQOR_HUMAN	4.77929	2.22022	1.7381	Factor_Treatment_HT1080_DMSO_control	HT1080_13-3L3A-biotin	No	lm
MYO1C	sp|O00159|MYO1C_HUMAN	4.1096	2.21757	1.7381	Factor_Treatment_HT1080_DMSO_control	HT1080_13-3L3A-biotin	No	lmer
BOLA2-SMG1P6	tr|H3BVE0|H3BVE0_HUMAN	4.2726	2.21973	1.7381	Factor_Treatment_HT1080_DMSO_control	HT1080_13-3L3A-biotin	No	lm
SUN2	sp|Q9UH99|SUN2_HUMAN	4.16212	2.21828	1.7381	Factor_Treatment_HT1080_DMSO_control	HT1080_13-3L3A-biotin	No	lm
PDIA6	sp|Q15084|PDIA6_HUMAN	6.5135	2.21114	1.73518	Factor_Treatment_HT1080_DMSO_control	HT1080_13-3L3A-biotin	No	lm
OGDH	tr|E9PCR7|E9PCR7_HUMAN	2.13189	2.19818	1.72572	Factor_Treatment_HT1080_DMSO_control	HT1080_13-3L3A-biotin	No	lm
UQCRC2	sp|P22695|QCR2_HUMAN	5.24043	2.19472	1.72572	Factor_Treatment_HT1080_DMSO_control	HT1080_13-3L3A-biotin	No	lm
ITPRIP	sp|Q8IWB1|IPRI_HUMAN	2.2236	2.19014	1.72457	Factor_Treatment_HT1080_DMSO_control	HT1080_13-3L3A-biotin	No	lm
TFRC	sp|P02786|TFR1_HUMAN	3.14755	2.18011	1.71795	Factor_Treatment_HT1080_DMSO_control	HT1080_13-3L3A-biotin	No	lm
M6PR	sp|P20645|MPRD_HUMAN	7.6869	2.16091	1.70213	Factor_Treatment_HT1080_DMSO_control	HT1080_13-3L3A-biotin	No	lm
MBOAT7	sp|Q96N66|MBOA7_HUMAN	3.42339	2.14342	1.68799	Factor_Treatment_HT1080_DMSO_control	HT1080_13-3L3A-biotin	No	lm
ANXA2	sp|P07355|ANXA2_HUMAN	4.06202	2.13538	1.68328	Factor_Treatment_HT1080_DMSO_control	HT1080_13-3L3A-biotin	No	lmer
PPFIBP1	sp|Q86W92|LIPB1_HUMAN	2.97821	2.12696	1.68045	Factor_Treatment_HT1080_DMSO_control	HT1080_13-3L3A-biotin	No	lm
NUP214	sp|P35658|NU214_HUMAN	1.0858	2.12597	1.68045	Factor_Treatment_HT1080_DMSO_control	HT1080_13-3L3A-biotin	No	lm
RPA2	sp|P15927|RFA2_HUMAN	4.22916	2.11383	1.67156	Factor_Treatment_HT1080_DMSO_control	HT1080_13-3L3A-biotin	No	lm
YBX1	tr|H0Y449|H0Y449_HUMAN	3.18412	2.1099	1.67086	Factor_Treatment_HT1080_DMSO_control	HT1080_13-3L3A-biotin	No	lm
TMX3	sp|Q96JJ7|TMX3_HUMAN	5.72578	2.10373	1.66789	Factor_Treatment_HT1080_DMSO_control	HT1080_13-3L3A-biotin	No	lm
IPO4	sp|Q8TEX9|IPO4_HUMAN	5.16226	2.07871	1.64606	Factor_Treatment_HT1080_DMSO_control	HT1080_13-3L3A-biotin	No	lm
MPRIP	tr|A0A494BZV2|A0A494BZV2_HUMAN	4.52137	2.0722	1.6458	Factor_Treatment_HT1080_DMSO_control	HT1080_13-3L3A-biotin	No	lmer
CCN1	sp|O00622|CCN1_HUMAN	2.95818	2.07216	1.6458	Factor_Treatment_HT1080_DMSO_control	HT1080_13-3L3A-biotin	No	lm
DLAT	sp|P10515|ODP2_HUMAN	6.5973	2.04719	1.62394	Factor_Treatment_HT1080_DMSO_control	HT1080_13-3L3A-biotin	No	lm
ATP5F1B	sp|P06576|ATPB_HUMAN	4.66963	2.03316	1.61912	Factor_Treatment_HT1080_DMSO_control	HT1080_13-3L3A-biotin	No	lm
CKAP4	sp|Q07065|CKAP4_HUMAN	5.72945	2.03773	1.61912	Factor_Treatment_HT1080_DMSO_control	HT1080_13-3L3A-biotin	No	lm
ARF4	sp|P18085|ARF4_HUMAN	3.90564	2.03447	1.61912	Factor_Treatment_HT1080_DMSO_control	HT1080_13-3L3A-biotin	No	lm
RPS9	sp|P46781|RS9_HUMAN	2.06108	2.01379	1.60278	Factor_Treatment_HT1080_DMSO_control	HT1080_13-3L3A-biotin	No	lmer
MAD2L1	sp|Q13257|MD2L1_HUMAN	3.94011	1.98853	1.58052	Factor_Treatment_HT1080_DMSO_control	HT1080_13-3L3A-biotin	No	lm
CCT5	sp|P48643|TCPE_HUMAN	2.82817	1.98201	1.57826	Factor_Treatment_HT1080_DMSO_control	HT1080_13-3L3A-biotin	No	lm
LOXL2	sp|Q9Y4K0|LOXL2_HUMAN	5.08266	1.98032	1.57826	Factor_Treatment_HT1080_DMSO_control	HT1080_13-3L3A-biotin	No	lm
SMC2	sp|O95347|SMC2_HUMAN	4.47327	1.95445	1.55534	Factor_Treatment_HT1080_DMSO_control	HT1080_13-3L3A-biotin	No	lm
EIF4A1	sp|P60842|IF4A1_HUMAN	2.28416	1.92616	1.53576	Factor_Treatment_HT1080_DMSO_control	HT1080_13-3L3A-biotin	No	lm
RPA3	sp|P35244|RFA3_HUMAN	4.98672	1.93079	1.53576	Factor_Treatment_HT1080_DMSO_control	HT1080_13-3L3A-biotin	No	lm
DARS1	sp|P14868|SYDC_HUMAN	3.3452	1.92838	1.53576	Factor_Treatment_HT1080_DMSO_control	HT1080_13-3L3A-biotin	No	lm
SSR1	tr|C9IZQ1|C9IZQ1_HUMAN	3.80454	1.92319	1.53566	Factor_Treatment_HT1080_DMSO_control	HT1080_13-3L3A-biotin	No	lm
COPA	sp|P53621|COPA_HUMAN	7.78018	1.91732	1.53264	Factor_Treatment_HT1080_DMSO_control	HT1080_13-3L3A-biotin	No	lm
RPLP0	sp|P05388|RLA0_HUMAN	3.88892	1.90005	1.52092	Factor_Treatment_HT1080_DMSO_control	HT1080_13-3L3A-biotin	No	lmer
RPS4X	sp|P62701|RS4X_HUMAN	3.37873	1.89996	1.52092	Factor_Treatment_HT1080_DMSO_control	HT1080_13-3L3A-biotin	No	lm
ITGA3	sp|P26006|ITA3_HUMAN	3.30231	1.85596	1.47971	Factor_Treatment_HT1080_DMSO_control	HT1080_13-3L3A-biotin	No	lm
RPS11	sp|P62280|RS11_HUMAN	2.05369	1.85006	1.47659	Factor_Treatment_HT1080_DMSO_control	HT1080_13-3L3A-biotin	No	lmer
RPS6	sp|P62753|RS6_HUMAN	2.09745	1.83839	1.46768	Factor_Treatment_HT1080_DMSO_control	HT1080_13-3L3A-biotin	No	lm
TIMM50	sp|Q3ZCQ8|TIM50_HUMAN	4.84986	1.83056	1.46531	Factor_Treatment_HT1080_DMSO_control	HT1080_13-3L3A-biotin	No	lm
PPM1G	sp|O15355|PPM1G_HUMAN	3.58909	1.83244	1.46531	Factor_Treatment_HT1080_DMSO_control	HT1080_13-3L3A-biotin	No	lm
MSH6	sp|P52701|MSH6_HUMAN	2.7396	1.81168	1.44913	Factor_Treatment_HT1080_DMSO_control	HT1080_13-3L3A-biotin	No	lm
RPL12	sp|P30050|RL12_HUMAN	2.82445	1.80619	1.44634	Factor_Treatment_HT1080_DMSO_control	HT1080_13-3L3A-biotin	No	lm
NPM1	sp|P06748|NPM_HUMAN	5.04959	1.77033	1.41314	Factor_Treatment_HT1080_DMSO_control	HT1080_13-3L3A-biotin	No	lm
RPS3	sp|P23396|RS3_HUMAN	2.2106	1.76258	1.40805	Factor_Treatment_HT1080_DMSO_control	HT1080_13-3L3A-biotin	No	lmer
TRIM28	sp|Q13263|TIF1B_HUMAN	3.78611	1.75579	1.4039	Factor_Treatment_HT1080_DMSO_control	HT1080_13-3L3A-biotin	No	lm
PPP6R1	sp|Q9UPN7|PP6R1_HUMAN	5.06776	1.75142	1.40215	Factor_Treatment_HT1080_DMSO_control	HT1080_13-3L3A-biotin	No	lm
SQSTM1	sp|Q13501|SQSTM_HUMAN	2.98138	1.74346	1.3968	Factor_Treatment_HT1080_DMSO_control	HT1080_13-3L3A-biotin	No	lm
MYEF2	tr|A0A0A0MR39|A0A0A0MR39_HUMAN	0.9857	1.70845	1.36696	Factor_Treatment_HT1080_DMSO_control	HT1080_13-3L3A-biotin	No	lm
CNP	sp|P09543|CN37_HUMAN	5.98352	1.71023	1.36696	Factor_Treatment_HT1080_DMSO_control	HT1080_13-3L3A-biotin	No	lm
C17orf75	sp|Q9HAS0|NJMU_HUMAN	3.32713	1.68787	1.34894	Factor_Treatment_HT1080_DMSO_control	HT1080_13-3L3A-biotin	No	lm
ERLIN1	sp|O75477|ERLN1_HUMAN	3.99523	1.68483	1.34845	Factor_Treatment_HT1080_DMSO_control	HT1080_13-3L3A-biotin	No	lm
ATP1A3	tr|A0A0A0MT26|A0A0A0MT26_HUMAN	1.82511	1.67777	1.34392	Factor_Treatment_HT1080_DMSO_control	HT1080_13-3L3A-biotin	No	lm
SERPINE1	sp|P05121|PAI1_HUMAN	3.2219	1.67505	1.34373	Factor_Treatment_HT1080_DMSO_control	HT1080_13-3L3A-biotin	No	lm
PRMT1	sp|Q99873|ANM1_HUMAN	5.16768	1.66032	1.33149	Factor_Treatment_HT1080_DMSO_control	HT1080_13-3L3A-biotin	No	lm
STT3A	sp|P46977|STT3A_HUMAN	3.00457	1.6533	1.32696	Factor_Treatment_HT1080_DMSO_control	HT1080_13-3L3A-biotin	No	lm
SPTLC1	sp|O15269|SPTC1_HUMAN	0.828216	1.63761	1.3184	Factor_Treatment_HT1080_DMSO_control	HT1080_13-3L3A-biotin	No	lm
HM13	tr|A0A3B3IUB5|A0A3B3IUB5_HUMAN	3.82889	1.63735	1.3184	Factor_Treatment_HT1080_DMSO_control	HT1080_13-3L3A-biotin	No	lm
ATXN10	sp|Q9UBB4|ATX10_HUMAN	7.84914	1.63822	1.3184	Factor_Treatment_HT1080_DMSO_control	HT1080_13-3L3A-biotin	No	lm
EPRS1	sp|P07814|SYEP_HUMAN	3.57055	1.63435	1.31783	Factor_Treatment_HT1080_DMSO_control	HT1080_13-3L3A-biotin	No	lm
SERPINH1	sp|P50454|SERPH_HUMAN	4.74525	1.6188	1.3047	Factor_Treatment_HT1080_DMSO_control	HT1080_13-3L3A-biotin	No	lm
PGAM5	sp|Q96HS1|PGAM5_HUMAN	1.97364	1.61557	1.30387	Factor_Treatment_HT1080_DMSO_control	HT1080_13-3L3A-biotin	No	lm
NUP205	sp|Q92621|NU205_HUMAN	3.4167	1.60983	1.30053	Factor_Treatment_HT1080_DMSO_control	HT1080_13-3L3A-biotin	No	lm
SDF4	sp|Q9BRK5|CAB45_HUMAN	5.70074	1.60549	1.29856	Factor_Treatment_HT1080_DMSO_control	HT1080_13-3L3A-biotin	No	lm
FASN	sp|P49327|FAS_HUMAN	7.49319	1.58474	1.28018	Factor_Treatment_HT1080_DMSO_control	HT1080_13-3L3A-biotin	No	lm
RPN2	sp|P04844|RPN2_HUMAN	3.2606	1.57604	1.27384	Factor_Treatment_HT1080_DMSO_control	HT1080_13-3L3A-biotin	No	lm
BAG2	sp|O95816|BAG2_HUMAN	1.09507	1.56502	1.26516	Factor_Treatment_HT1080_DMSO_control	HT1080_13-3L3A-biotin	No	lm
NCEH1	tr|A0A0A0MTJ9|A0A0A0MTJ9_HUMAN	5.4834	1.56179	1.26426	Factor_Treatment_HT1080_DMSO_control	HT1080_13-3L3A-biotin	No	lm
HK2	sp|P52789|HXK2_HUMAN	2.3811	1.54856	1.25335	Factor_Treatment_HT1080_DMSO_control	HT1080_13-3L3A-biotin	No	lm
RICTOR	sp|Q6R327|RICTR_HUMAN	2.47033	1.54439	1.25148	Factor_Treatment_HT1080_DMSO_control	HT1080_13-3L3A-biotin	No	lm
PRDX4	sp|Q13162|PRDX4_HUMAN	3.60808	1.52991	1.23929	Factor_Treatment_HT1080_DMSO_control	HT1080_13-3L3A-biotin	No	lm
PSMD11	sp|O00231|PSD11_HUMAN	5.0917	1.52398	1.23748	Factor_Treatment_HT1080_DMSO_control	HT1080_13-3L3A-biotin	No	lm
	tr|J3KR12|J3KR12_HUMAN	4.65914	1.52355	1.23748	Factor_Treatment_HT1080_DMSO_control	HT1080_13-3L3A-biotin	No	lm
TRIP13	sp|Q15645|PCH2_HUMAN	1.84808	1.51288	1.22906	Factor_Treatment_HT1080_DMSO_control	HT1080_13-3L3A-biotin	No	lmer
CSNK1A1	tr|A0A590UJ43|A0A590UJ43_HUMAN	2.80456	1.50832	1.22675	Factor_Treatment_HT1080_DMSO_control	HT1080_13-3L3A-biotin	No	lm
RPL21	sp|P46778|RL21_HUMAN	2.77922	1.4922	1.21508	Factor_Treatment_HT1080_DMSO_control	HT1080_13-3L3A-biotin	No	lm
PSMC3	sp|P17980|PRS6A_HUMAN	3.41302	1.49439	1.21508	Factor_Treatment_HT1080_DMSO_control	HT1080_13-3L3A-biotin	No	lm
RAN	tr|J3KQE5|J3KQE5_HUMAN	2.51431	1.48709	1.21218	Factor_Treatment_HT1080_DMSO_control	HT1080_13-3L3A-biotin	No	lm
IPO9	sp|Q96P70|IPO9_HUMAN	6.03178	1.46361	1.19291	Factor_Treatment_HT1080_DMSO_control	HT1080_13-3L3A-biotin	No	lm
AKAP8L	sp|Q9ULX6|AKP8L_HUMAN	2.99458	1.46343	1.19291	Factor_Treatment_HT1080_DMSO_control	HT1080_13-3L3A-biotin	No	lm
DNAJA2	sp|O60884|DNJA2_HUMAN	4.16048	1.45903	1.19069	Factor_Treatment_HT1080_DMSO_control	HT1080_13-3L3A-biotin	No	lm
TUBAL3	sp|A6NHL2|TBAL3_HUMAN	2.77345	1.44763	1.18145	Factor_Treatment_HT1080_DMSO_control	HT1080_13-3L3A-biotin	No	lm
TUFM	sp|P49411|EFTU_HUMAN	2.81953	1.42981	1.16749	Factor_Treatment_HT1080_DMSO_control	HT1080_13-3L3A-biotin	No	lm
QSOX2	sp|Q6ZRP7|QSOX2_HUMAN	8.14588	1.42937	1.16749	Factor_Treatment_HT1080_DMSO_control	HT1080_13-3L3A-biotin	No	lm
DNAJA1	sp|P31689|DNJA1_HUMAN	1.32836	1.39623	1.13649	Factor_Treatment_HT1080_DMSO_control	HT1080_13-3L3A-biotin	No	lm
IPO5	tr|H0Y8C6|H0Y8C6_HUMAN	4.76167	1.39137	1.13375	Factor_Treatment_HT1080_DMSO_control	HT1080_13-3L3A-biotin	No	lm
RUVBL1	sp|Q9Y265|RUVB1_HUMAN	4.21115	1.36839	1.11288	Factor_Treatment_HT1080_DMSO_control	HT1080_13-3L3A-biotin	No	lm
IARS1	sp|P41252|SYIC_HUMAN	3.32801	1.36017	1.10866	Factor_Treatment_HT1080_DMSO_control	HT1080_13-3L3A-biotin	No	lm
HSP90B1	sp|P14625|ENPL_HUMAN	3.688	1.35997	1.10866	Factor_Treatment_HT1080_DMSO_control	HT1080_13-3L3A-biotin	No	lm
S100A6	sp|P06703|S10A6_HUMAN	4.01566	1.34881	1.09958	Factor_Treatment_HT1080_DMSO_control	HT1080_13-3L3A-biotin	No	lm
EDC4	sp|Q6P2E9|EDC4_HUMAN	4.54984	1.33661	1.08946	Factor_Treatment_HT1080_DMSO_control	HT1080_13-3L3A-biotin	No	lm
ESYT1	sp|Q9BSJ8|ESYT1_HUMAN	3.5522	1.33018	1.08509	Factor_Treatment_HT1080_DMSO_control	HT1080_13-3L3A-biotin	No	lm
HSPB1	sp|P04792|HSPB1_HUMAN	1.48217	1.32616	1.08473	Factor_Treatment_HT1080_DMSO_control	HT1080_13-3L3A-biotin	No	lmer
MYO1B	sp|O43795|MYO1B_HUMAN	3.23418	1.32573	1.08473	Factor_Treatment_HT1080_DMSO_control	HT1080_13-3L3A-biotin	No	lmer
EXOC4	sp|Q96A65|EXOC4_HUMAN	3.17164	1.31933	1.08037	Factor_Treatment_HT1080_DMSO_control	HT1080_13-3L3A-biotin	No	lm
PPP6C	sp|O00743|PPP6_HUMAN	3.58689	1.3009	1.06397	Factor_Treatment_HT1080_DMSO_control	HT1080_13-3L3A-biotin	No	lm
LMNA	sp|P02545|LMNA_HUMAN	2.00113	1.29454	1.05962	Factor_Treatment_HT1080_DMSO_control	HT1080_13-3L3A-biotin	No	lmer
SELENOO	sp|Q9BVL4|SELO_HUMAN	5.51208	1.28358	1.05465	Factor_Treatment_HT1080_DMSO_control	HT1080_13-3L3A-biotin	No	lm
PSMD2	sp|Q13200|PSMD2_HUMAN	4.96613	1.28541	1.05465	Factor_Treatment_HT1080_DMSO_control	HT1080_13-3L3A-biotin	No	lm
RBBP7	sp|Q16576|RBBP7_HUMAN	5.1194	1.28646	1.05465	Factor_Treatment_HT1080_DMSO_control	HT1080_13-3L3A-biotin	No	lm
IMMT	sp|Q16891|MIC60_HUMAN	4.07641	1.26528	1.0409	Factor_Treatment_HT1080_DMSO_control	HT1080_13-3L3A-biotin	No	lm
PHB2	sp|Q99623|PHB2_HUMAN	3.04648	1.26392	1.0409	Factor_Treatment_HT1080_DMSO_control	HT1080_13-3L3A-biotin	No	lm
AHSA1	sp|O95433|AHSA1_HUMAN	2.35644	1.26782	1.0409	Factor_Treatment_HT1080_DMSO_control	HT1080_13-3L3A-biotin	No	lm
VDAC2	sp|P45880|VDAC2_HUMAN	2.37703	1.24257	1.02213	Factor_Treatment_HT1080_DMSO_control	HT1080_13-3L3A-biotin	No	lmer
SEC61B	sp|P60468|SC61B_HUMAN	3.96894	1.23956	1.02213	Factor_Treatment_HT1080_DMSO_control	HT1080_13-3L3A-biotin	No	lm
CALM2	tr|E7EMB3|E7EMB3_HUMAN	3.21167	1.23932	1.02213	Factor_Treatment_HT1080_DMSO_control	HT1080_13-3L3A-biotin	No	lm
TBC1D9B	sp|Q66K14|TBC9B_HUMAN	5.58279	1.2118	0.998454	Factor_Treatment_HT1080_DMSO_control	HT1080_13-3L3A-biotin	No	lm
CCT6A	sp|P40227|TCPZ_HUMAN	2.22885	1.21182	0.998454	Factor_Treatment_HT1080_DMSO_control	HT1080_13-3L3A-biotin	No	lm
TMOD3	sp|Q9NYL9|TMOD3_HUMAN	3.29343	1.20909	0.997651	Factor_Treatment_HT1080_DMSO_control	HT1080_13-3L3A-biotin	No	lm
NUP62	sp|P37198|NUP62_HUMAN	1.24369	1.19779	0.988606	Factor_Treatment_HT1080_DMSO_control	HT1080_13-3L3A-biotin	No	lm
RPA1	sp|P27694|RFA1_HUMAN	3.46458	1.19431	0.988606	Factor_Treatment_HT1080_DMSO_control	HT1080_13-3L3A-biotin	No	lmer
BSG	sp|P35613|BASI_HUMAN	4.23255	1.19277	0.988606	Factor_Treatment_HT1080_DMSO_control	HT1080_13-3L3A-biotin	No	lm
EMD	sp|P50402|EMD_HUMAN	3.2059	1.19249	0.988606	Factor_Treatment_HT1080_DMSO_control	HT1080_13-3L3A-biotin	No	lm
GNAI2	sp|P04899|GNAI2_HUMAN	4.66147	1.18943	0.987407	Factor_Treatment_HT1080_DMSO_control	HT1080_13-3L3A-biotin	No	lm
PLEC	sp|Q15149|PLEC_HUMAN	2.15128	1.18542	0.98526	Factor_Treatment_HT1080_DMSO_control	HT1080_13-3L3A-biotin	No	lmer
HNRNPF	sp|P52597|HNRPF_HUMAN	5.49453	1.17636	0.979704	Factor_Treatment_HT1080_DMSO_control	HT1080_13-3L3A-biotin	No	lm
SEPTIN9	sp|Q9UHD8|SEPT9_HUMAN	3.46303	1.17617	0.979704	Factor_Treatment_HT1080_DMSO_control	HT1080_13-3L3A-biotin	No	lm
ESYT2	sp|A0FGR8|ESYT2_HUMAN	4.94797	1.17102	0.976392	Factor_Treatment_HT1080_DMSO_control	HT1080_13-3L3A-biotin	No	lm
DIABLO	sp|Q9NR28|DBLOH_HUMAN	7.17804	1.16853	0.975732	Factor_Treatment_HT1080_DMSO_control	HT1080_13-3L3A-biotin	No	lm
RAI14	sp|Q9P0K7|RAI14_HUMAN	2.97086	1.14728	0.956306	Factor_Treatment_HT1080_DMSO_control	HT1080_13-3L3A-biotin	No	lmer
RUVBL2	sp|Q9Y230|RUVB2_HUMAN	2.76671	1.13826	0.9491	Factor_Treatment_HT1080_DMSO_control	HT1080_13-3L3A-biotin	No	lm
FAM83H	tr|A0A494C1T9|A0A494C1T9_HUMAN	2.47889	1.09973	0.912377	Factor_Treatment_HT1080_DMSO_control	HT1080_13-3L3A-biotin	No	lmer
RPS26P11	sp|Q5JNZ5|RS26L_HUMAN	1.33194	1.07742	0.891864	Factor_Treatment_HT1080_DMSO_control	HT1080_13-3L3A-biotin	No	lm
SLC25A4	sp|P12235|ADT1_HUMAN	0.780304	1.07339	0.889619	Factor_Treatment_HT1080_DMSO_control	HT1080_13-3L3A-biotin	No	lm
EP400	sp|Q96L91|EP400_HUMAN	-0.470064	1.07033	0.888346	Factor_Treatment_HT1080_DMSO_control	HT1080_13-3L3A-biotin	No	lm
TMPO	sp|P42167|LAP2B_HUMAN	2.26057	1.06284	0.882631	Factor_Treatment_HT1080_DMSO_control	HT1080_13-3L3A-biotin	No	lm
CAPZA1	sp|P52907|CAZA1_HUMAN	5.06175	1.05491	0.87999	Factor_Treatment_HT1080_DMSO_control	HT1080_13-3L3A-biotin	No	lm
PAWR	sp|Q96IZ0|PAWR_HUMAN	5.84974	1.05703	0.87999	Factor_Treatment_HT1080_DMSO_control	HT1080_13-3L3A-biotin	No	lm
RPL24	sp|P83731|RL24_HUMAN	2.05226	1.05582	0.87999	Factor_Treatment_HT1080_DMSO_control	HT1080_13-3L3A-biotin	No	lm
CTNNB1	tr|A0A2R8Y5A3|A0A2R8Y5A3_HUMAN	2.40726	1.05243	0.879255	Factor_Treatment_HT1080_DMSO_control	HT1080_13-3L3A-biotin	No	lm
H2AX	sp|P16104|H2AX_HUMAN	1.83659	1.04926	0.87783	Factor_Treatment_HT1080_DMSO_control	HT1080_13-3L3A-biotin	No	lm
NME1-NME2	tr|Q32Q12|Q32Q12_HUMAN	1.71987	1.03741	0.867709	Factor_Treatment_HT1080_DMSO_control	HT1080_13-3L3A-biotin	No	lm
TMPO	sp|P42166|LAP2A_HUMAN	2.63054	1.03144	0.863466	Factor_Treatment_HT1080_DMSO_control	HT1080_13-3L3A-biotin	No	lmer
ESRP1	sp|Q6NXG1|ESRP1_HUMAN	4.09344	1.02909	0.862832	Factor_Treatment_HT1080_DMSO_control	HT1080_13-3L3A-biotin	No	lm
YWHAE	sp|P62258|1433E_HUMAN	3.14813	1.01351	0.848972	Factor_Treatment_HT1080_DMSO_control	HT1080_13-3L3A-biotin	No	lm
ACACB	sp|O00763|ACACB_HUMAN	-0.393874	1.01059	0.847755	Factor_Treatment_HT1080_DMSO_control	HT1080_13-3L3A-biotin	No	lmer
BANF1	sp|O75531|BAF_HUMAN	1.26316	1.00213	0.840998	Factor_Treatment_HT1080_DMSO_control	HT1080_13-3L3A-biotin	No	lm
DBT	sp|P11182|ODB2_HUMAN	1.02771	0.986334	0.826893	Factor_Treatment_HT1080_DMSO_control	HT1080_13-3L3A-biotin	No	lm
DSTN	sp|P60981|DEST_HUMAN	4.26058	0.980843	0.823088	Factor_Treatment_HT1080_DMSO_control	HT1080_13-3L3A-biotin	No	lm
	tr|F5H423|F5H423_HUMAN	2.99647	0.969527	0.815127	Factor_Treatment_HT1080_DMSO_control	HT1080_13-3L3A-biotin	No	lm
RTRAF	sp|Q9Y224|RTRAF_HUMAN	3.75721	0.969728	0.815127	Factor_Treatment_HT1080_DMSO_control	HT1080_13-3L3A-biotin	No	lm
MAN1B1	sp|Q9UKM7|MA1B1_HUMAN	2.86076	0.967752	0.815018	Factor_Treatment_HT1080_DMSO_control	HT1080_13-3L3A-biotin	No	lm
MYL12A	tr|J3QRS3|J3QRS3_HUMAN	2.94885	0.959774	0.810355	Factor_Treatment_HT1080_DMSO_control	HT1080_13-3L3A-biotin	No	lm
RHEB	sp|Q15382|RHEB_HUMAN	5.57007	0.959841	0.810355	Factor_Treatment_HT1080_DMSO_control	HT1080_13-3L3A-biotin	No	lm
DHCR24	tr|A0A0A0MTI1|A0A0A0MTI1_HUMAN	1.15908	0.941828	0.794058	Factor_Treatment_HT1080_DMSO_control	HT1080_13-3L3A-biotin	No	lm
RPL23	sp|P62829|RL23_HUMAN	1.39474	0.917915	0.771787	Factor_Treatment_HT1080_DMSO_control	HT1080_13-3L3A-biotin	No	lm
IGF2R	sp|P11717|MPRI_HUMAN	1.3773	0.911711	0.768615	Factor_Treatment_HT1080_DMSO_control	HT1080_13-3L3A-biotin	No	lm
ECH1	sp|Q13011|ECH1_HUMAN	-1.34864	0.911477	0.768615	Factor_Treatment_HT1080_DMSO_control	HT1080_13-3L3A-biotin	No	lm
CORO1C	sp|Q9ULV4|COR1C_HUMAN	2.36591	0.907403	0.767782	Factor_Treatment_HT1080_DMSO_control	HT1080_13-3L3A-biotin	No	lm
RPL17-C18orf32	tr|A0A0A6YYL6|A0A0A6YYL6_HUMAN	2.90209	0.908214	0.767782	Factor_Treatment_HT1080_DMSO_control	HT1080_13-3L3A-biotin	No	lm
UBC	sp|P0CG48|UBC_HUMAN	4.95674	0.905527	0.767517	Factor_Treatment_HT1080_DMSO_control	HT1080_13-3L3A-biotin	No	lm
YWHAQ	sp|P27348|1433T_HUMAN	6.14299	0.897954	0.763149	Factor_Treatment_HT1080_DMSO_control	HT1080_13-3L3A-biotin	No	lm
LSM14A	sp|Q8ND56|LS14A_HUMAN	1.10942	0.898142	0.763149	Factor_Treatment_HT1080_DMSO_control	HT1080_13-3L3A-biotin	No	lm
PABPC1	sp|P11940|PABP1_HUMAN	3.47426	0.884186	0.750974	Factor_Treatment_HT1080_DMSO_control	HT1080_13-3L3A-biotin	No	lm
PPP2R1B	sp|P30154|2AAB_HUMAN	4.65741	0.881819	0.750195	Factor_Treatment_HT1080_DMSO_control	HT1080_13-3L3A-biotin	No	lm
H4C1	sp|P62805|H4_HUMAN	2.22498	0.872677	0.742635	Factor_Treatment_HT1080_DMSO_control	HT1080_13-3L3A-biotin	No	lm
ABCB6	sp|Q9NP58|ABCB6_HUMAN	3.02844	0.857827	0.730171	Factor_Treatment_HT1080_DMSO_control	HT1080_13-3L3A-biotin	No	lm
LUC7L2	tr|A0A0A6YYJ8|A0A0A6YYJ8_HUMAN	1.11065	0.857065	0.730171	Factor_Treatment_HT1080_DMSO_control	HT1080_13-3L3A-biotin	No	lm
RPL6	sp|Q02878|RL6_HUMAN	1.87497	0.848827	0.725058	Factor_Treatment_HT1080_DMSO_control	HT1080_13-3L3A-biotin	No	lmer
VIM	sp|P08670|VIME_HUMAN	1.50423	0.849399	0.725058	Factor_Treatment_HT1080_DMSO_control	HT1080_13-3L3A-biotin	No	lmer
H3-3B	tr|K7ES00|K7ES00_HUMAN	0.888126	0.840821	0.718605	Factor_Treatment_HT1080_DMSO_control	HT1080_13-3L3A-biotin	No	lm
RPS7	sp|P62081|RS7_HUMAN	2.93312	0.825045	0.704378	Factor_Treatment_HT1080_DMSO_control	HT1080_13-3L3A-biotin	No	lm
SELENOK	sp|Q9Y6D0|SELK_HUMAN	4.5006	0.822716	0.703591	Factor_Treatment_HT1080_DMSO_control	HT1080_13-3L3A-biotin	No	lm
RAE1	tr|E9PQ57|E9PQ57_HUMAN	3.56963	0.8146	0.697012	Factor_Treatment_HT1080_DMSO_control	HT1080_13-3L3A-biotin	No	lm
RPL18A	sp|Q02543|RL18A_HUMAN	2.9063	0.80703	0.690975	Factor_Treatment_HT1080_DMSO_control	HT1080_13-3L3A-biotin	No	lm
MYL6	tr|B7Z6Z4|B7Z6Z4_HUMAN	2.15156	0.789972	0.675443	Factor_Treatment_HT1080_DMSO_control	HT1080_13-3L3A-biotin	No	lm
VCP	sp|P55072|TERA_HUMAN	2.18101	0.782161	0.669153	Factor_Treatment_HT1080_DMSO_control	HT1080_13-3L3A-biotin	No	lm
TPM4	sp|P67936|TPM4_HUMAN	4.90233	0.771271	0.659779	Factor_Treatment_HT1080_DMSO_control	HT1080_13-3L3A-biotin	No	lm
FAU	tr|E9PR30|E9PR30_HUMAN	-1.08926	0.757302	0.647321	Factor_Treatment_HT1080_DMSO_control	HT1080_13-3L3A-biotin	No	lm
SPR	sp|P35270|SPRE_HUMAN	3.32385	0.755512	0.647036	Factor_Treatment_HT1080_DMSO_control	HT1080_13-3L3A-biotin	No	lm
PKM	sp|P14618|KPYM_HUMAN	2.93204	0.744196	0.638519	Factor_Treatment_HT1080_DMSO_control	HT1080_13-3L3A-biotin	No	lm
LGALS1	sp|P09382|LEG1_HUMAN	2.26278	0.744	0.638519	Factor_Treatment_HT1080_DMSO_control	HT1080_13-3L3A-biotin	No	lm
RPL11	sp|P62913|RL11_HUMAN	4.07986	0.739919	0.635928	Factor_Treatment_HT1080_DMSO_control	HT1080_13-3L3A-biotin	No	lm
RACK1	tr|D6REE5|D6REE5_HUMAN	-1.30304	0.733364	0.630858	Factor_Treatment_HT1080_DMSO_control	HT1080_13-3L3A-biotin	No	lm
CFL1	tr|E9PK25|E9PK25_HUMAN	4.74561	0.72983	0.628803	Factor_Treatment_HT1080_DMSO_control	HT1080_13-3L3A-biotin	No	lm
RPL4	sp|P36578|RL4_HUMAN	2.21846	0.725591	0.626039	Factor_Treatment_HT1080_DMSO_control	HT1080_13-3L3A-biotin	No	lm
YWHAZ	sp|P63104|1433Z_HUMAN	3.07464	0.702691	0.604609	Factor_Treatment_HT1080_DMSO_control	HT1080_13-3L3A-biotin	No	lm
TIMM13	sp|Q9Y5L4|TIM13_HUMAN	4.37749	0.695476	0.600318	Factor_Treatment_HT1080_DMSO_control	HT1080_13-3L3A-biotin	No	lm
CLTC	tr|A0A087WVQ6|A0A087WVQ6_HUMAN	2.09014	0.696798	0.600318	Factor_Treatment_HT1080_DMSO_control	HT1080_13-3L3A-biotin	No	lmer
RPL3	sp|P39023|RL3_HUMAN	2.27757	0.677471	0.583768	Factor_Treatment_HT1080_DMSO_control	HT1080_13-3L3A-biotin	No	lm
RPLP2	sp|P05387|RLA2_HUMAN	4.51456	0.643366	0.553413	Factor_Treatment_HT1080_DMSO_control	HT1080_13-3L3A-biotin	No	lm
RPL31	sp|P62899|RL31_HUMAN	2.38505	0.64278	0.553413	Factor_Treatment_HT1080_DMSO_control	HT1080_13-3L3A-biotin	No	lm
RPL36A	tr|J3KQN4|J3KQN4_HUMAN	1.15967	0.644066	0.553413	Factor_Treatment_HT1080_DMSO_control	HT1080_13-3L3A-biotin	No	lm
RPS23	sp|P62266|RS23_HUMAN	0.931868	0.635305	0.547902	Factor_Treatment_HT1080_DMSO_control	HT1080_13-3L3A-biotin	No	lm
RPL7A	sp|P62424|RL7A_HUMAN	4.4778	0.634403	0.547902	Factor_Treatment_HT1080_DMSO_control	HT1080_13-3L3A-biotin	No	lm
ICAM1	sp|P05362|ICAM1_HUMAN	-1.14438	0.632401	0.547327	Factor_Treatment_HT1080_DMSO_control	HT1080_13-3L3A-biotin	No	lm
RPL14	sp|P50914|RL14_HUMAN	5.43406	0.625976	0.542323	Factor_Treatment_HT1080_DMSO_control	HT1080_13-3L3A-biotin	No	lm
CAPZB	tr|B1AK88|B1AK88_HUMAN	2.8481	0.588804	0.506568	Factor_Treatment_HT1080_DMSO_control	HT1080_13-3L3A-biotin	No	lm
MTOR	sp|P42345|MTOR_HUMAN	2.76344	0.582629	0.501806	Factor_Treatment_HT1080_DMSO_control	HT1080_13-3L3A-biotin	No	lm
RPL10A	sp|P62906|RL10A_HUMAN	4.16455	0.574076	0.494661	Factor_Treatment_HT1080_DMSO_control	HT1080_13-3L3A-biotin	No	lm
RPL37	sp|P61927|RL37_HUMAN	1.11222	0.572355	0.494342	Factor_Treatment_HT1080_DMSO_control	HT1080_13-3L3A-biotin	No	lm
FXR1	sp|P51114|FXR1_HUMAN	2.80105	0.570768	0.494155	Factor_Treatment_HT1080_DMSO_control	HT1080_13-3L3A-biotin	No	lm
CD59	sp|P13987|CD59_HUMAN	2.68739	0.5603	0.485081	Factor_Treatment_HT1080_DMSO_control	HT1080_13-3L3A-biotin	No	lm
PTBP1	tr|A0A0U1RRM4|A0A0U1RRM4_HUMAN	1.56804	0.557123	0.483294	Factor_Treatment_HT1080_DMSO_control	HT1080_13-3L3A-biotin	No	lm
HNRNPM	sp|P52272|HNRPM_HUMAN	3.08554	0.554722	0.482278	Factor_Treatment_HT1080_DMSO_control	HT1080_13-3L3A-biotin	No	lm
RPS14	sp|P62263|RS14_HUMAN	1.85814	0.551021	0.479958	Factor_Treatment_HT1080_DMSO_control	HT1080_13-3L3A-biotin	No	lm
RPS18	sp|P62269|RS18_HUMAN	2.34093	0.547646	0.479331	Factor_Treatment_HT1080_DMSO_control	HT1080_13-3L3A-biotin	No	lm
RPL23A	tr|A8MUS3|A8MUS3_HUMAN	1.93946	0.548196	0.479331	Factor_Treatment_HT1080_DMSO_control	HT1080_13-3L3A-biotin	No	lm
FKBP8	sp|Q14318|FKBP8_HUMAN	3.39738	0.529815	0.463097	Factor_Treatment_HT1080_DMSO_control	HT1080_13-3L3A-biotin	No	lm
CAVIN1	sp|Q6NZI2|CAVN1_HUMAN	2.08816	0.528681	0.463097	Factor_Treatment_HT1080_DMSO_control	HT1080_13-3L3A-biotin	No	lm
EFEMP1	sp|Q12805|FBLN3_HUMAN	2.9755	0.510605	0.446381	Factor_Treatment_HT1080_DMSO_control	HT1080_13-3L3A-biotin	No	lm
RPL13	sp|P26373|RL13_HUMAN	1.85752	0.499545	0.436676	Factor_Treatment_HT1080_DMSO_control	HT1080_13-3L3A-biotin	No	lm
EIF2S1	sp|P05198|IF2A_HUMAN	3.92516	0.495584	0.435412	Factor_Treatment_HT1080_DMSO_control	HT1080_13-3L3A-biotin	No	lm
RPLP1	sp|P05386|RLA1_HUMAN	3.12949	0.496894	0.435412	Factor_Treatment_HT1080_DMSO_control	HT1080_13-3L3A-biotin	No	lm
CLTB	sp|P09497|CLCB_HUMAN	1.74492	0.454704	0.395875	Factor_Treatment_HT1080_DMSO_control	HT1080_13-3L3A-biotin	No	lmer
NXN	sp|Q6DKJ4|NXN_HUMAN	2.1016	0.451691	0.394201	Factor_Treatment_HT1080_DMSO_control	HT1080_13-3L3A-biotin	No	lm
MSH2	tr|A0A2R8YG02|A0A2R8YG02_HUMAN	2.60753	0.449643	0.393487	Factor_Treatment_HT1080_DMSO_control	HT1080_13-3L3A-biotin	No	lm
RBM14	sp|Q96PK6|RBM14_HUMAN	1.3267	0.443586	0.38876	Factor_Treatment_HT1080_DMSO_control	HT1080_13-3L3A-biotin	No	lm
TMX1	sp|Q9H3N1|TMX1_HUMAN	1.22047	0.435317	0.381817	Factor_Treatment_HT1080_DMSO_control	HT1080_13-3L3A-biotin	No	lm
RPS2	sp|P15880|RS2_HUMAN	1.64851	0.428236	0.376058	Factor_Treatment_HT1080_DMSO_control	HT1080_13-3L3A-biotin	No	lm
LIMA1	sp|Q9UHB6|LIMA1_HUMAN	-1.19511	0.420489	0.369629	Factor_Treatment_HT1080_DMSO_control	HT1080_13-3L3A-biotin	No	lm
PCM1	sp|Q15154|PCM1_HUMAN	2.71575	0.419024	0.369478	Factor_Treatment_HT1080_DMSO_control	HT1080_13-3L3A-biotin	No	lm
SFPQ	sp|P23246|SFPQ_HUMAN	3.1882	0.417024	0.368788	Factor_Treatment_HT1080_DMSO_control	HT1080_13-3L3A-biotin	No	lm
GNB2	sp|P62879|GBB2_HUMAN	2.99829	0.409068	0.362139	Factor_Treatment_HT1080_DMSO_control	HT1080_13-3L3A-biotin	No	lm
TPM1	tr|B7Z596|B7Z596_HUMAN	2.45264	0.40771	0.362083	Factor_Treatment_HT1080_DMSO_control	HT1080_13-3L3A-biotin	No	lm
ELAVL1	sp|Q15717|ELAV1_HUMAN	3.9022	0.405876	0.361546	Factor_Treatment_HT1080_DMSO_control	HT1080_13-3L3A-biotin	No	lm
RPS3A	sp|P61247|RS3A_HUMAN	2.22366	0.379015	0.33598	Factor_Treatment_HT1080_DMSO_control	HT1080_13-3L3A-biotin	No	lm
RPL7	sp|P18124|RL7_HUMAN	2.66092	0.367157	0.325413	Factor_Treatment_HT1080_DMSO_control	HT1080_13-3L3A-biotin	No	lm
LARP1	sp|Q6PKG0|LARP1_HUMAN	2.6505	0.358433	0.319174	Factor_Treatment_HT1080_DMSO_control	HT1080_13-3L3A-biotin	No	lm
	tr|A0A0U1RRH7|A0A0U1RRH7_HUMAN	-1.4443	0.358349	0.319174	Factor_Treatment_HT1080_DMSO_control	HT1080_13-3L3A-biotin	No	lm
RPL30	sp|P62888|RL30_HUMAN	2.27376	0.352445	0.31455	Factor_Treatment_HT1080_DMSO_control	HT1080_13-3L3A-biotin	No	lm
LRRC59	sp|Q96AG4|LRC59_HUMAN	0.986344	0.344878	0.308259	Factor_Treatment_HT1080_DMSO_control	HT1080_13-3L3A-biotin	No	lm
RTN4	sp|Q9NQC3|RTN4_HUMAN	2.28058	0.334803	0.299456	Factor_Treatment_HT1080_DMSO_control	HT1080_13-3L3A-biotin	No	lm
GAPDH	sp|P04406|G3P_HUMAN	3.70575	0.325692	0.294138	Factor_Treatment_HT1080_DMSO_control	HT1080_13-3L3A-biotin	No	lm
CAPRIN1	sp|Q14444|CAPR1_HUMAN	2.25302	0.326348	0.294138	Factor_Treatment_HT1080_DMSO_control	HT1080_13-3L3A-biotin	No	lm
NCL	sp|P19338|NUCL_HUMAN	2.63426	0.325794	0.294138	Factor_Treatment_HT1080_DMSO_control	HT1080_13-3L3A-biotin	No	lm
TNFAIP2	sp|Q03169|TNAP2_HUMAN	0.793547	0.318785	0.288487	Factor_Treatment_HT1080_DMSO_control	HT1080_13-3L3A-biotin	No	lm
RPS5	sp|P46782|RS5_HUMAN	2.71835	0.313699	0.284654	Factor_Treatment_HT1080_DMSO_control	HT1080_13-3L3A-biotin	No	lm
KRAS	sp|P01116|RASK_HUMAN	1.06949	0.296564	0.26877	Factor_Treatment_HT1080_DMSO_control	HT1080_13-3L3A-biotin	No	lm
RPS8	sp|P62241|RS8_HUMAN	1.02896	0.286432	0.259884	Factor_Treatment_HT1080_DMSO_control	HT1080_13-3L3A-biotin	No	lm
BIRC2	sp|Q13490|BIRC2_HUMAN	1.00527	0.271364	0.246058	Factor_Treatment_HT1080_DMSO_control	HT1080_13-3L3A-biotin	No	lm
RPL22	sp|P35268|RL22_HUMAN	0.683529	0.255748	0.231913	Factor_Treatment_HT1080_DMSO_control	HT1080_13-3L3A-biotin	No	lm
ARL1	tr|F8VYN9|F8VYN9_HUMAN	-1.2034	0.254744	0.231913	Factor_Treatment_HT1080_DMSO_control	HT1080_13-3L3A-biotin	No	lm
SUB1	sp|P53999|TCP4_HUMAN	0.638594	0.218362	0.196763	Factor_Treatment_HT1080_DMSO_control	HT1080_13-3L3A-biotin	No	lm
GOLGA3	sp|Q08378|GOGA3_HUMAN	0.123518	0.211842	0.191471	Factor_Treatment_HT1080_DMSO_control	HT1080_13-3L3A-biotin	No	lm
CLTA	sp|P09496|CLCA_HUMAN	2.08197	0.193274	0.175351	Factor_Treatment_HT1080_DMSO_control	HT1080_13-3L3A-biotin	No	lm
PKP3	sp|Q9Y446|PKP3_HUMAN	1.63297	0.194292	0.175351	Factor_Treatment_HT1080_DMSO_control	HT1080_13-3L3A-biotin	No	lm
PKP2	sp|Q99959|PKP2_HUMAN	1.60293	0.163731	0.147025	Factor_Treatment_HT1080_DMSO_control	HT1080_13-3L3A-biotin	No	lm
ILF2	sp|Q12905|ILF2_HUMAN	1.26792	0.15936	0.143869	Factor_Treatment_HT1080_DMSO_control	HT1080_13-3L3A-biotin	No	lm
CAV1	sp|Q03135|CAV1_HUMAN	1.66948	0.139909	0.12563	Factor_Treatment_HT1080_DMSO_control	HT1080_13-3L3A-biotin	No	lm
COL17A1	sp|Q9UMD9|COHA1_HUMAN	-1.58283	0.131192	0.118121	Factor_Treatment_HT1080_DMSO_control	HT1080_13-3L3A-biotin	No	lm
RPL38	sp|P63173|RL38_HUMAN	0.391243	0.105141	0.0932747	Factor_Treatment_HT1080_DMSO_control	HT1080_13-3L3A-biotin	No	lm
RPL27A	sp|P46776|RL27A_HUMAN	0.328865	0.0991755	0.0885102	Factor_Treatment_HT1080_DMSO_control	HT1080_13-3L3A-biotin	No	lm
HNRNPA2B1	sp|P22626|ROA2_HUMAN	0.306905	0.0928778	0.0834105	Factor_Treatment_HT1080_DMSO_control	HT1080_13-3L3A-biotin	No	lm
NUP88	sp|Q99567|NUP88_HUMAN	-0.189105	0.0854037	0.0771311	Factor_Treatment_HT1080_DMSO_control	HT1080_13-3L3A-biotin	No	lm
RPS13	sp|P62277|RS13_HUMAN	0.471479	0.0826868	0.0756057	Factor_Treatment_HT1080_DMSO_control	HT1080_13-3L3A-biotin	No	lm
SEC16A	sp|O15027|SC16A_HUMAN	0.669138	0.0784169	0.0725241	Factor_Treatment_HT1080_DMSO_control	HT1080_13-3L3A-biotin	No	lm
MARCKS	sp|P29966|MARCS_HUMAN	0.351166	0.0564411	0.0517333	Factor_Treatment_HT1080_DMSO_control	HT1080_13-3L3A-biotin	No	lm
LDHB	tr|A0A5F9ZHM4|A0A5F9ZHM4_HUMAN	0.104699	0.0510923	0.0475662	Factor_Treatment_HT1080_DMSO_control	HT1080_13-3L3A-biotin	No	lm
RBM39	sp|Q14498|RBM39_HUMAN	0.0644879	0.0448255	0.042478	Factor_Treatment_HT1080_DMSO_control	HT1080_13-3L3A-biotin	No	lm
PCNT	sp|O95613|PCNT_HUMAN	0.0298413	0.0370391	0.0358669	Factor_Treatment_HT1080_DMSO_control	HT1080_13-3L3A-biotin	No	lm
RPL13A	tr|M0QYS1|M0QYS1_HUMAN	0.0114744	0.00687185	0.00687185	Factor_Treatment_HT1080_DMSO_control	HT1080_13-3L3A-biotin	No	lm

## Sheet: CaSki 13-3L3A-bio vs. 13-bio
Gene	Protein	Est_Fc	Pval	Qval	Reference_condition	Comparision_condition	Is_outlier	modelFit
SEC63	sp|Q9UGP8|SEC63_HUMAN	4.58099	26.317	23.7476	Factor_Treatment_CaSki_13-3L3A-biotin	CaSki_13-biotin	No	lmer
TUBB2A	sp|Q13885|TBB2A_HUMAN	2.85038	25.8106	23.5422	Factor_Treatment_CaSki_13-3L3A-biotin	CaSki_13-biotin	No	lmer
TUBB6	sp|Q9BUF5|TBB6_HUMAN	2.68104	18.3445	16.2522	Factor_Treatment_CaSki_13-3L3A-biotin	CaSki_13-biotin	No	lmer
TRIP13	sp|Q15645|PCH2_HUMAN	2.37457	16.5789	14.6115	Factor_Treatment_CaSki_13-3L3A-biotin	CaSki_13-biotin	No	lmer
ATP2A2	sp|P16615|AT2A2_HUMAN	2.58555	16.3968	14.5264	Factor_Treatment_CaSki_13-3L3A-biotin	CaSki_13-biotin	No	lmer
UGGT1	sp|Q9NYU2|UGGG1_HUMAN	1.84935	15.734	13.9428	Factor_Treatment_CaSki_13-3L3A-biotin	CaSki_13-biotin	No	lmer
TUBA1C	tr|F5H5D3|F5H5D3_HUMAN	2.56495	15.5604	13.8361	Factor_Treatment_CaSki_13-3L3A-biotin	CaSki_13-biotin	No	lmer
PRKDC	sp|P78527|PRKDC_HUMAN	2.37886	12.3751	10.7088	Factor_Treatment_CaSki_13-3L3A-biotin	CaSki_13-biotin	No	lmer
DLST	sp|P36957|ODO2_HUMAN	3.07585	12.2437	10.6285	Factor_Treatment_CaSki_13-3L3A-biotin	CaSki_13-biotin	No	lmer
SLC16A3	sp|O15427|MOT4_HUMAN	2.03285	10.4968	8.92747	Factor_Treatment_CaSki_13-3L3A-biotin	CaSki_13-biotin	No	lm
EGFR	sp|P00533|EGFR_HUMAN	2.19829	10.2423	8.71432	Factor_Treatment_CaSki_13-3L3A-biotin	CaSki_13-biotin	No	lm
SLC3A2	tr|J3KPF3|J3KPF3_HUMAN	2.12766	9.52317	8.03297	Factor_Treatment_CaSki_13-3L3A-biotin	CaSki_13-biotin	No	lmer
ATL3	sp|Q6DD88|ATLA3_HUMAN	2.68812	9.27379	7.81836	Factor_Treatment_CaSki_13-3L3A-biotin	CaSki_13-biotin	No	lm
SLC7A5	sp|Q01650|LAT1_HUMAN	2.24391	9.10502	7.71712	Factor_Treatment_CaSki_13-3L3A-biotin	CaSki_13-biotin	No	lmer
SLC25A4	sp|P12235|ADT1_HUMAN	2.2493	9.08237	7.71712	Factor_Treatment_CaSki_13-3L3A-biotin	CaSki_13-biotin	No	lm
GLRX3	sp|O76003|GLRX3_HUMAN	2.94228	9.12824	7.71712	Factor_Treatment_CaSki_13-3L3A-biotin	CaSki_13-biotin	No	lmer
HSPB1	sp|P04792|HSPB1_HUMAN	2.16168	8.97173	7.6328	Factor_Treatment_CaSki_13-3L3A-biotin	CaSki_13-biotin	No	lmer
SEC13	sp|P55735|SEC13_HUMAN	2.8808	8.69375	7.37965	Factor_Treatment_CaSki_13-3L3A-biotin	CaSki_13-biotin	No	lm
ACTG1	sp|P63261|ACTG_HUMAN	1.64356	8.46901	7.17839	Factor_Treatment_CaSki_13-3L3A-biotin	CaSki_13-biotin	No	lmer
AIFM1	sp|O95831|AIFM1_HUMAN	1.55201	7.54415	6.297	Factor_Treatment_CaSki_13-3L3A-biotin	CaSki_13-biotin	No	lm
CANX	sp|P27824|CALX_HUMAN	2.24261	7.54676	6.297	Factor_Treatment_CaSki_13-3L3A-biotin	CaSki_13-biotin	No	lm
TUBA4A	sp|P68366|TBA4A_HUMAN	2.51803	7.51876	6.29181	Factor_Treatment_CaSki_13-3L3A-biotin	CaSki_13-biotin	No	lm
HSPA1B	tr|A0A0G2JIW1|A0A0G2JIW1_HUMAN	2.29933	7.22989	6.02224	Factor_Treatment_CaSki_13-3L3A-biotin	CaSki_13-biotin	No	lmer
ARFGEF1	sp|Q9Y6D6|BIG1_HUMAN	2.44052	7.17225	5.98309	Factor_Treatment_CaSki_13-3L3A-biotin	CaSki_13-biotin	No	lmer
ASPH	sp|Q12797|ASPH_HUMAN	2.40274	7.14767	5.97623	Factor_Treatment_CaSki_13-3L3A-biotin	CaSki_13-biotin	No	lmer
CALU	sp|O43852|CALU_HUMAN	2.26926	6.97777	5.83976	Factor_Treatment_CaSki_13-3L3A-biotin	CaSki_13-biotin	No	lmer
TUBA1A	sp|Q71U36|TBA1A_HUMAN	2.66105	6.98395	5.83976	Factor_Treatment_CaSki_13-3L3A-biotin	CaSki_13-biotin	No	lm
CORO1C	sp|Q9ULV4|COR1C_HUMAN	2.86638	6.56621	5.44399	Factor_Treatment_CaSki_13-3L3A-biotin	CaSki_13-biotin	No	lm
LGALS1	sp|P09382|LEG1_HUMAN	5.15551	6.29663	5.18966	Factor_Treatment_CaSki_13-3L3A-biotin	CaSki_13-biotin	No	lm
CSNK1A1	tr|A0A590UJ43|A0A590UJ43_HUMAN	3.73144	6.22694	5.13469	Factor_Treatment_CaSki_13-3L3A-biotin	CaSki_13-biotin	No	lm
SLC25A5	sp|P05141|ADT2_HUMAN	2.30649	5.99463	4.91662	Factor_Treatment_CaSki_13-3L3A-biotin	CaSki_13-biotin	No	lm
CAD	sp|P27708|PYR1_HUMAN	1.83705	5.92039	4.85617	Factor_Treatment_CaSki_13-3L3A-biotin	CaSki_13-biotin	No	lmer
BZW1	sp|Q7L1Q6|BZW1_HUMAN	2.05652	5.79855	4.74769	Factor_Treatment_CaSki_13-3L3A-biotin	CaSki_13-biotin	No	lm
LIMA1	sp|Q9UHB6|LIMA1_HUMAN	1.80604	5.6386	4.6007	Factor_Treatment_CaSki_13-3L3A-biotin	CaSki_13-biotin	No	lm
COPB1	sp|P53618|COPB_HUMAN	2.40497	5.61778	4.59247	Factor_Treatment_CaSki_13-3L3A-biotin	CaSki_13-biotin	No	lm
RPL12	sp|P30050|RL12_HUMAN	3.26536	5.5967	4.58363	Factor_Treatment_CaSki_13-3L3A-biotin	CaSki_13-biotin	No	lm
CALM2	tr|E7EMB3|E7EMB3_HUMAN	5.14433	5.57693	4.57576	Factor_Treatment_CaSki_13-3L3A-biotin	CaSki_13-biotin	No	lm
KPNB1	sp|Q14974|IMB1_HUMAN	2.80711	5.53092	4.54133	Factor_Treatment_CaSki_13-3L3A-biotin	CaSki_13-biotin	No	lmer
RPN1	sp|P04843|RPN1_HUMAN	2.33769	5.47537	4.49706	Factor_Treatment_CaSki_13-3L3A-biotin	CaSki_13-biotin	No	lmer
PCBP2	sp|Q15366|PCBP2_HUMAN	3.26955	5.42123	4.45391	Factor_Treatment_CaSki_13-3L3A-biotin	CaSki_13-biotin	No	lm
HSPA8	sp|P11142|HSP7C_HUMAN	2.10495	5.38814	4.43155	Factor_Treatment_CaSki_13-3L3A-biotin	CaSki_13-biotin	No	lmer
TXN	sp|P10599|THIO_HUMAN	1.7433	5.16392	4.2178	Factor_Treatment_CaSki_13-3L3A-biotin	CaSki_13-biotin	No	lm
VCP	sp|P55072|TERA_HUMAN	4.2089	5.09754	4.16163	Factor_Treatment_CaSki_13-3L3A-biotin	CaSki_13-biotin	No	lm
TXNRD1	sp|Q16881|TRXR1_HUMAN	1.33152	5.00925	4.08333	Factor_Treatment_CaSki_13-3L3A-biotin	CaSki_13-biotin	No	lmer
XPOT	sp|O43592|XPOT_HUMAN	2.11757	4.91634	4.00605	Factor_Treatment_CaSki_13-3L3A-biotin	CaSki_13-biotin	No	lm
XPO1	sp|O14980|XPO1_HUMAN	2.20059	4.91267	4.00605	Factor_Treatment_CaSki_13-3L3A-biotin	CaSki_13-biotin	No	lmer
YBX1	tr|H0Y449|H0Y449_HUMAN	3.87354	4.888	3.99072	Factor_Treatment_CaSki_13-3L3A-biotin	CaSki_13-biotin	No	lm
VAC14	sp|Q08AM6|VAC14_HUMAN	1.92096	4.73736	3.84923	Factor_Treatment_CaSki_13-3L3A-biotin	CaSki_13-biotin	No	lm
DYNC1H1	sp|Q14204|DYHC1_HUMAN	2.19934	4.72707	3.84789	Factor_Treatment_CaSki_13-3L3A-biotin	CaSki_13-biotin	No	lmer
ACTA2	sp|P62736|ACTA_HUMAN	1.40436	4.62533	3.75493	Factor_Treatment_CaSki_13-3L3A-biotin	CaSki_13-biotin	No	lmer
SELENOF	sp|O60613|SEP15_HUMAN	1.66992	4.59269	3.73089	Factor_Treatment_CaSki_13-3L3A-biotin	CaSki_13-biotin	No	lm
CSE1L	sp|P55060|XPO2_HUMAN	2.19556	4.57943	3.72606	Factor_Treatment_CaSki_13-3L3A-biotin	CaSki_13-biotin	No	lm
ICAM1	sp|P05362|ICAM1_HUMAN	2.74115	4.54238	3.69728	Factor_Treatment_CaSki_13-3L3A-biotin	CaSki_13-biotin	No	lm
RPS6	sp|P62753|RS6_HUMAN	2.91624	4.34514	3.50816	Factor_Treatment_CaSki_13-3L3A-biotin	CaSki_13-biotin	No	lm
HSD17B12	sp|Q53GQ0|DHB12_HUMAN	2.02171	4.21358	3.38457	Factor_Treatment_CaSki_13-3L3A-biotin	CaSki_13-biotin	No	lm
LDHA	sp|P00338|LDHA_HUMAN	2.84617	4.15266	3.33148	Factor_Treatment_CaSki_13-3L3A-biotin	CaSki_13-biotin	No	lm
ELOVL1	sp|Q9BW60|ELOV1_HUMAN	2.32321	4.1307	3.3172	Factor_Treatment_CaSki_13-3L3A-biotin	CaSki_13-biotin	No	lm
RCN2	sp|Q14257|RCN2_HUMAN	2.64619	4.05404	3.24809	Factor_Treatment_CaSki_13-3L3A-biotin	CaSki_13-biotin	No	lmer
SPTLC1	sp|O15269|SPTC1_HUMAN	2.09514	4.03416	3.24062	Factor_Treatment_CaSki_13-3L3A-biotin	CaSki_13-biotin	No	lm
GSN	sp|P06396|GELS_HUMAN	3.79558	4.03184	3.24062	Factor_Treatment_CaSki_13-3L3A-biotin	CaSki_13-biotin	No	lm
EIF4A1	sp|P60842|IF4A1_HUMAN	3.27253	3.91463	3.13059	Factor_Treatment_CaSki_13-3L3A-biotin	CaSki_13-biotin	No	lm
NUP93	tr|H3BVG0|H3BVG0_HUMAN	2.18212	3.89741	3.12043	Factor_Treatment_CaSki_13-3L3A-biotin	CaSki_13-biotin	No	lm
RCN1	sp|Q15293|RCN1_HUMAN	2.04562	3.88575	3.11572	Factor_Treatment_CaSki_13-3L3A-biotin	CaSki_13-biotin	No	lm
SMC2	sp|O95347|SMC2_HUMAN	2.49177	3.82876	3.06557	Factor_Treatment_CaSki_13-3L3A-biotin	CaSki_13-biotin	No	lm
SEC61A1	tr|B4DR61|B4DR61_HUMAN	2.75808	3.81019	3.05373	Factor_Treatment_CaSki_13-3L3A-biotin	CaSki_13-biotin	No	lm
EEF1A1	sp|P68104|EF1A1_HUMAN	2.00973	3.79477	3.04494	Factor_Treatment_CaSki_13-3L3A-biotin	CaSki_13-biotin	No	lmer
TUBB4B	sp|P68371|TBB4B_HUMAN	2.31221	3.75188	3.00858	Factor_Treatment_CaSki_13-3L3A-biotin	CaSki_13-biotin	No	lmer
TUBB	sp|P07437|TBB5_HUMAN	2.8635	3.73689	3.00003	Factor_Treatment_CaSki_13-3L3A-biotin	CaSki_13-biotin	No	lmer
AHNAK	sp|Q09666|AHNK_HUMAN	2.21593	3.69783	2.97355	Factor_Treatment_CaSki_13-3L3A-biotin	CaSki_13-biotin	No	lmer
PHGDH	sp|O43175|SERA_HUMAN	2.30719	3.69839	2.97355	Factor_Treatment_CaSki_13-3L3A-biotin	CaSki_13-biotin	No	lmer
IPO11	sp|Q9UI26|IPO11_HUMAN	2.3892	3.68281	2.96469	Factor_Treatment_CaSki_13-3L3A-biotin	CaSki_13-biotin	No	lm
SLC25A3	sp|Q00325|MPCP_HUMAN	2.38402	3.60517	2.89313	Factor_Treatment_CaSki_13-3L3A-biotin	CaSki_13-biotin	No	lm
PGAM5	sp|Q96HS1|PGAM5_HUMAN	2.60445	3.48257	2.77652	Factor_Treatment_CaSki_13-3L3A-biotin	CaSki_13-biotin	No	lm
CTNNB1	tr|A0A2R8Y5A3|A0A2R8Y5A3_HUMAN	2.83368	3.45683	2.75669	Factor_Treatment_CaSki_13-3L3A-biotin	CaSki_13-biotin	No	lm
HSPA5	sp|P11021|BIP_HUMAN	2.06419	3.40715	2.71284	Factor_Treatment_CaSki_13-3L3A-biotin	CaSki_13-biotin	No	lmer
ALG1	sp|Q9BT22|ALG1_HUMAN	1.82365	3.38754	2.69898	Factor_Treatment_CaSki_13-3L3A-biotin	CaSki_13-biotin	No	lm
TPM3	tr|A0A087WWU8|A0A087WWU8_HUMAN	2.80649	3.3714	2.68852	Factor_Treatment_CaSki_13-3L3A-biotin	CaSki_13-biotin	No	lm
GCN1	sp|Q92616|GCN1_HUMAN	2.35557	3.34953	2.67225	Factor_Treatment_CaSki_13-3L3A-biotin	CaSki_13-biotin	No	lmer
CCN1	sp|O00622|CCN1_HUMAN	2.15641	3.31871	2.64696	Factor_Treatment_CaSki_13-3L3A-biotin	CaSki_13-biotin	No	lm
SLC1A5	sp|Q15758|AAAT_HUMAN	2.58121	3.21446	2.54818	Factor_Treatment_CaSki_13-3L3A-biotin	CaSki_13-biotin	No	lm
SPTLC2	sp|O15270|SPTC2_HUMAN	2.47878	3.20309	2.5422	Factor_Treatment_CaSki_13-3L3A-biotin	CaSki_13-biotin	No	lm
MBOAT7	sp|Q96N66|MBOA7_HUMAN	2.37858	3.18671	2.53538	Factor_Treatment_CaSki_13-3L3A-biotin	CaSki_13-biotin	No	lm
CAND1	sp|Q86VP6|CAND1_HUMAN	2.11091	3.18567	2.53538	Factor_Treatment_CaSki_13-3L3A-biotin	CaSki_13-biotin	No	lmer
THBS1	sp|P07996|TSP1_HUMAN	2.43785	3.09077	2.44568	Factor_Treatment_CaSki_13-3L3A-biotin	CaSki_13-biotin	No	lm
HSPD1	sp|P10809|CH60_HUMAN	2.42014	3.04643	2.40648	Factor_Treatment_CaSki_13-3L3A-biotin	CaSki_13-biotin	No	lmer
SCD	sp|O00767|ACOD_HUMAN	2.35511	2.98215	2.34728	Factor_Treatment_CaSki_13-3L3A-biotin	CaSki_13-biotin	No	lm
PFKP	sp|Q01813|PFKAP_HUMAN	2.28913	2.96864	2.33879	Factor_Treatment_CaSki_13-3L3A-biotin	CaSki_13-biotin	No	lm
STT3A	sp|P46977|STT3A_HUMAN	2.21084	2.96077	2.33588	Factor_Treatment_CaSki_13-3L3A-biotin	CaSki_13-biotin	No	lm
MYH10	sp|P35580|MYH10_HUMAN	1.34045	2.93269	2.31271	Factor_Treatment_CaSki_13-3L3A-biotin	CaSki_13-biotin	No	lmer
DNAJB11	sp|Q9UBS4|DJB11_HUMAN	1.61062	2.92065	2.30822	Factor_Treatment_CaSki_13-3L3A-biotin	CaSki_13-biotin	No	lm
SERPINE1	sp|P05121|PAI1_HUMAN	2.78086	2.91855	2.30822	Factor_Treatment_CaSki_13-3L3A-biotin	CaSki_13-biotin	No	lm
SSBP1	sp|Q04837|SSBP_HUMAN	2.19333	2.84664	2.24374	Factor_Treatment_CaSki_13-3L3A-biotin	CaSki_13-biotin	No	lm
ARL1	tr|F8VYN9|F8VYN9_HUMAN	3.06832	2.84463	2.24374	Factor_Treatment_CaSki_13-3L3A-biotin	CaSki_13-biotin	No	lm
SLC16A1	sp|P53985|MOT1_HUMAN	2.15863	2.82882	2.23258	Factor_Treatment_CaSki_13-3L3A-biotin	CaSki_13-biotin	No	lm
MARCKS	sp|P29966|MARCS_HUMAN	2.66185	2.79427	2.20262	Factor_Treatment_CaSki_13-3L3A-biotin	CaSki_13-biotin	No	lm
	tr|J3KR12|J3KR12_HUMAN	2.91141	2.78934	2.20224	Factor_Treatment_CaSki_13-3L3A-biotin	CaSki_13-biotin	No	lm
LTN1	sp|O94822|LTN1_HUMAN	1.88356	2.75587	2.17327	Factor_Treatment_CaSki_13-3L3A-biotin	CaSki_13-biotin	No	lm
PLEC	sp|Q15149|PLEC_HUMAN	4.34238	2.744	2.16585	Factor_Treatment_CaSki_13-3L3A-biotin	CaSki_13-biotin	No	lmer
RPS9	sp|P46781|RS9_HUMAN	2.2112	2.71607	2.14233	Factor_Treatment_CaSki_13-3L3A-biotin	CaSki_13-biotin	No	lmer
MYH9	sp|P35579|MYH9_HUMAN	1.17727	2.69508	2.12571	Factor_Treatment_CaSki_13-3L3A-biotin	CaSki_13-biotin	No	lmer
PPP6R3	sp|Q5H9R7|PP6R3_HUMAN	2.12212	2.68239	2.11734	Factor_Treatment_CaSki_13-3L3A-biotin	CaSki_13-biotin	No	lm
IPO7	sp|O95373|IPO7_HUMAN	2.76419	2.65536	2.09459	Factor_Treatment_CaSki_13-3L3A-biotin	CaSki_13-biotin	No	lmer
RPS11	sp|P62280|RS11_HUMAN	2.3521	2.62432	2.06778	Factor_Treatment_CaSki_13-3L3A-biotin	CaSki_13-biotin	No	lmer
RPS3	sp|P23396|RS3_HUMAN	2.43891	2.61422	2.06604	Factor_Treatment_CaSki_13-3L3A-biotin	CaSki_13-biotin	No	lmer
ATP5F1A	sp|P25705|ATPA_HUMAN	1.93571	2.6145	2.06604	Factor_Treatment_CaSki_13-3L3A-biotin	CaSki_13-biotin	No	lmer
MSH6	sp|P52701|MSH6_HUMAN	1.86742	2.57297	2.03298	Factor_Treatment_CaSki_13-3L3A-biotin	CaSki_13-biotin	No	lm
RPL23	sp|P62829|RL23_HUMAN	2.45161	2.57458	2.03298	Factor_Treatment_CaSki_13-3L3A-biotin	CaSki_13-biotin	No	lm
LOXL2	sp|Q9Y4K0|LOXL2_HUMAN	3.48096	2.5653	2.02935	Factor_Treatment_CaSki_13-3L3A-biotin	CaSki_13-biotin	No	lm
HM13	tr|A0A3B3IUB5|A0A3B3IUB5_HUMAN	2.68049	2.55942	2.02747	Factor_Treatment_CaSki_13-3L3A-biotin	CaSki_13-biotin	No	lm
CCT6A	sp|P40227|TCPZ_HUMAN	2.29261	2.52249	1.99451	Factor_Treatment_CaSki_13-3L3A-biotin	CaSki_13-biotin	No	lm
HSP90AB1	sp|P08238|HS90B_HUMAN	2.75916	2.46783	1.95536	Factor_Treatment_CaSki_13-3L3A-biotin	CaSki_13-biotin	No	lmer
RAN	tr|J3KQE5|J3KQE5_HUMAN	2.58601	2.47869	1.95536	Factor_Treatment_CaSki_13-3L3A-biotin	CaSki_13-biotin	No	lm
FAM83H	tr|A0A494C1T9|A0A494C1T9_HUMAN	2.81096	2.47414	1.95536	Factor_Treatment_CaSki_13-3L3A-biotin	CaSki_13-biotin	No	lmer
BAG2	sp|O95816|BAG2_HUMAN	1.40477	2.46911	1.95536	Factor_Treatment_CaSki_13-3L3A-biotin	CaSki_13-biotin	No	lm
EEF2	sp|P13639|EF2_HUMAN	2.56293	2.45198	1.9433	Factor_Treatment_CaSki_13-3L3A-biotin	CaSki_13-biotin	No	lmer
TUBAL3	sp|A6NHL2|TBAL3_HUMAN	2.21643	2.44419	1.94247	Factor_Treatment_CaSki_13-3L3A-biotin	CaSki_13-biotin	No	lm
PCNA	sp|P12004|PCNA_HUMAN	2.33367	2.44366	1.94247	Factor_Treatment_CaSki_13-3L3A-biotin	CaSki_13-biotin	No	lm
ITPRIP	sp|Q8IWB1|IPRI_HUMAN	2.47616	2.43741	1.93992	Factor_Treatment_CaSki_13-3L3A-biotin	CaSki_13-biotin	No	lm
CDK1	sp|P06493|CDK1_HUMAN	1.80192	2.38233	1.8885	Factor_Treatment_CaSki_13-3L3A-biotin	CaSki_13-biotin	No	lm
IQGAP3	sp|Q86VI3|IQGA3_HUMAN	1.76506	2.33724	1.84704	Factor_Treatment_CaSki_13-3L3A-biotin	CaSki_13-biotin	No	lm
SUN2	sp|Q9UH99|SUN2_HUMAN	3.06869	2.32634	1.83975	Factor_Treatment_CaSki_13-3L3A-biotin	CaSki_13-biotin	No	lm
TFRC	sp|P02786|TFR1_HUMAN	2.6124	2.31535	1.83234	Factor_Treatment_CaSki_13-3L3A-biotin	CaSki_13-biotin	No	lm
ARF4	sp|P18085|ARF4_HUMAN	2.10688	2.2806	1.80113	Factor_Treatment_CaSki_13-3L3A-biotin	CaSki_13-biotin	No	lm
TNPO1	sp|Q92973|TNPO1_HUMAN	2.15914	2.26591	1.78996	Factor_Treatment_CaSki_13-3L3A-biotin	CaSki_13-biotin	No	lmer
NCAPD2	sp|Q15021|CND1_HUMAN	2.06981	2.24502	1.77256	Factor_Treatment_CaSki_13-3L3A-biotin	CaSki_13-biotin	No	lm
MYO1C	sp|O00159|MYO1C_HUMAN	3.55078	2.23568	1.76667	Factor_Treatment_CaSki_13-3L3A-biotin	CaSki_13-biotin	No	lmer
RPS4X	sp|P62701|RS4X_HUMAN	1.41542	2.21475	1.74918	Factor_Treatment_CaSki_13-3L3A-biotin	CaSki_13-biotin	No	lm
UQCRC2	sp|P22695|QCR2_HUMAN	1.89882	2.20633	1.74416	Factor_Treatment_CaSki_13-3L3A-biotin	CaSki_13-biotin	No	lm
PPP6C	sp|O00743|PPP6_HUMAN	2.39275	2.1717	1.71292	Factor_Treatment_CaSki_13-3L3A-biotin	CaSki_13-biotin	No	lm
GEMIN4	sp|P57678|GEMI4_HUMAN	1.63978	2.15583	1.70099	Factor_Treatment_CaSki_13-3L3A-biotin	CaSki_13-biotin	No	lmer
SEPTIN9	sp|Q9UHD8|SEPT9_HUMAN	3.26	2.14979	1.70099	Factor_Treatment_CaSki_13-3L3A-biotin	CaSki_13-biotin	No	lm
ECPAS	tr|J3KN16|J3KN16_HUMAN	2.55834	2.15104	1.70099	Factor_Treatment_CaSki_13-3L3A-biotin	CaSki_13-biotin	No	lm
TMX1	sp|Q9H3N1|TMX1_HUMAN	1.52861	2.1448	1.69928	Factor_Treatment_CaSki_13-3L3A-biotin	CaSki_13-biotin	No	lm
LMNA	sp|P02545|LMNA_HUMAN	3.16503	2.11224	1.6732	Factor_Treatment_CaSki_13-3L3A-biotin	CaSki_13-biotin	No	lmer
TXNL1	sp|O43396|TXNL1_HUMAN	4.20598	2.11322	1.6732	Factor_Treatment_CaSki_13-3L3A-biotin	CaSki_13-biotin	No	lm
AKAP8L	sp|Q9ULX6|AKP8L_HUMAN	2.64278	2.10171	1.67222	Factor_Treatment_CaSki_13-3L3A-biotin	CaSki_13-biotin	No	lm
TECR	tr|M0R2N5|M0R2N5_HUMAN	2.03068	2.10339	1.67222	Factor_Treatment_CaSki_13-3L3A-biotin	CaSki_13-biotin	No	lm
TMX3	sp|Q96JJ7|TMX3_HUMAN	3.09929	2.10511	1.67222	Factor_Treatment_CaSki_13-3L3A-biotin	CaSki_13-biotin	No	lm
NME1-NME2	tr|Q32Q12|Q32Q12_HUMAN	2.26999	2.08534	1.66209	Factor_Treatment_CaSki_13-3L3A-biotin	CaSki_13-biotin	No	lm
SERPINH1	sp|P50454|SERPH_HUMAN	2.38535	2.08697	1.66209	Factor_Treatment_CaSki_13-3L3A-biotin	CaSki_13-biotin	No	lm
ITGA3	sp|P26006|ITA3_HUMAN	1.94821	2.07972	1.65956	Factor_Treatment_CaSki_13-3L3A-biotin	CaSki_13-biotin	No	lm
NUP205	sp|Q92621|NU205_HUMAN	2.28975	2.06118	1.64714	Factor_Treatment_CaSki_13-3L3A-biotin	CaSki_13-biotin	No	lm
TIMM50	sp|Q3ZCQ8|TIM50_HUMAN	2.19735	2.06386	1.64714	Factor_Treatment_CaSki_13-3L3A-biotin	CaSki_13-biotin	No	lm
XIAP	sp|P98170|XIAP_HUMAN	1.39263	2.05345	1.64244	Factor_Treatment_CaSki_13-3L3A-biotin	CaSki_13-biotin	No	lm
RPS16	sp|P62249|RS16_HUMAN	0.908572	2.02235	1.61524	Factor_Treatment_CaSki_13-3L3A-biotin	CaSki_13-biotin	No	lm
XPO5	sp|Q9HAV4|XPO5_HUMAN	2.46433	2.02026	1.61524	Factor_Treatment_CaSki_13-3L3A-biotin	CaSki_13-biotin	No	lm
RPL24	sp|P83731|RL24_HUMAN	2.53569	2.01342	1.61137	Factor_Treatment_CaSki_13-3L3A-biotin	CaSki_13-biotin	No	lm
RPS26P11	sp|Q5JNZ5|RS26L_HUMAN	2.21531	1.99831	1.60005	Factor_Treatment_CaSki_13-3L3A-biotin	CaSki_13-biotin	No	lm
HSP90AA1	sp|P07900|HS90A_HUMAN	2.06314	1.99624	1.60005	Factor_Treatment_CaSki_13-3L3A-biotin	CaSki_13-biotin	No	lmer
RICTOR	sp|Q6R327|RICTR_HUMAN	1.67247	1.97786	1.58458	Factor_Treatment_CaSki_13-3L3A-biotin	CaSki_13-biotin	No	lm
OGDH	tr|E9PCR7|E9PCR7_HUMAN	2.2358	1.94274	1.55234	Factor_Treatment_CaSki_13-3L3A-biotin	CaSki_13-biotin	No	lm
ESRP1	sp|Q6NXG1|ESRP1_HUMAN	2.42722	1.92917	1.54164	Factor_Treatment_CaSki_13-3L3A-biotin	CaSki_13-biotin	No	lm
ERLIN1	sp|O75477|ERLN1_HUMAN	3.54815	1.91878	1.5341	Factor_Treatment_CaSki_13-3L3A-biotin	CaSki_13-biotin	No	lm
BZW2	sp|Q9Y6E2|BZW2_HUMAN	1.58656	1.90865	1.5268	Factor_Treatment_CaSki_13-3L3A-biotin	CaSki_13-biotin	No	lm
MAN1B1	sp|Q9UKM7|MA1B1_HUMAN	2.12527	1.9033	1.52426	Factor_Treatment_CaSki_13-3L3A-biotin	CaSki_13-biotin	No	lm
CAVIN1	sp|Q6NZI2|CAVN1_HUMAN	2.51577	1.89463	1.51838	Factor_Treatment_CaSki_13-3L3A-biotin	CaSki_13-biotin	No	lm
TOR1AIP2	sp|Q8NFQ8|TOIP2_HUMAN	1.58255	1.88076	1.50728	Factor_Treatment_CaSki_13-3L3A-biotin	CaSki_13-biotin	No	lm
HNRNPK	sp|P61978|HNRPK_HUMAN	2.68567	1.87251	1.50179	Factor_Treatment_CaSki_13-3L3A-biotin	CaSki_13-biotin	No	lmer
PKP3	sp|Q9Y446|PKP3_HUMAN	3.72594	1.86533	1.49735	Factor_Treatment_CaSki_13-3L3A-biotin	CaSki_13-biotin	No	lm
IMMT	sp|Q16891|MIC60_HUMAN	4.14908	1.85753	1.49311	Factor_Treatment_CaSki_13-3L3A-biotin	CaSki_13-biotin	No	lm
SQOR	sp|Q9Y6N5|SQOR_HUMAN	2.23635	1.85566	1.49311	Factor_Treatment_CaSki_13-3L3A-biotin	CaSki_13-biotin	No	lm
GOLGB1	sp|Q14789|GOGB1_HUMAN	1.83349	1.84797	1.49079	Factor_Treatment_CaSki_13-3L3A-biotin	CaSki_13-biotin	No	lm
RPS23	sp|P62266|RS23_HUMAN	1.75506	1.85044	1.49079	Factor_Treatment_CaSki_13-3L3A-biotin	CaSki_13-biotin	No	lm
PRDX4	sp|Q13162|PRDX4_HUMAN	1.40205	1.84275	1.48992	Factor_Treatment_CaSki_13-3L3A-biotin	CaSki_13-biotin	No	lm
MYEF2	tr|A0A0A0MR39|A0A0A0MR39_HUMAN	0.792191	1.84181	1.48992	Factor_Treatment_CaSki_13-3L3A-biotin	CaSki_13-biotin	No	lm
PDIA6	sp|Q15084|PDIA6_HUMAN	1.58	1.82013	1.48292	Factor_Treatment_CaSki_13-3L3A-biotin	CaSki_13-biotin	No	lm
NPM1	sp|P06748|NPM_HUMAN	2.93078	1.81677	1.48292	Factor_Treatment_CaSki_13-3L3A-biotin	CaSki_13-biotin	No	lm
NUP214	sp|P35658|NU214_HUMAN	0.8718	1.82282	1.48292	Factor_Treatment_CaSki_13-3L3A-biotin	CaSki_13-biotin	No	lm
IGF2BP1	sp|Q9NZI8|IF2B1_HUMAN	1.23803	1.83032	1.48292	Factor_Treatment_CaSki_13-3L3A-biotin	CaSki_13-biotin	No	lm
P4HB	sp|P07237|PDIA1_HUMAN	0.810726	1.81961	1.48292	Factor_Treatment_CaSki_13-3L3A-biotin	CaSki_13-biotin	No	lmer
MAGED2	sp|Q9UNF1|MAGD2_HUMAN	1.6536	1.81822	1.48292	Factor_Treatment_CaSki_13-3L3A-biotin	CaSki_13-biotin	No	lm
RTRAF	sp|Q9Y224|RTRAF_HUMAN	2.19202	1.82348	1.48292	Factor_Treatment_CaSki_13-3L3A-biotin	CaSki_13-biotin	No	lm
ATP1A3	tr|A0A0A0MT26|A0A0A0MT26_HUMAN	1.67993	1.80785	1.47833	Factor_Treatment_CaSki_13-3L3A-biotin	CaSki_13-biotin	No	lm
TMEM165	sp|Q9HC07|TM165_HUMAN	1.8083	1.8058	1.47833	Factor_Treatment_CaSki_13-3L3A-biotin	CaSki_13-biotin	No	lm
EMD	sp|P50402|EMD_HUMAN	2.75389	1.80466	1.47833	Factor_Treatment_CaSki_13-3L3A-biotin	CaSki_13-biotin	No	lm
HNRNPF	sp|P52597|HNRPF_HUMAN	4.08619	1.79182	1.46796	Factor_Treatment_CaSki_13-3L3A-biotin	CaSki_13-biotin	No	lm
SSR1	tr|C9IZQ1|C9IZQ1_HUMAN	2.72832	1.78115	1.45975	Factor_Treatment_CaSki_13-3L3A-biotin	CaSki_13-biotin	No	lm
RPL21	sp|P46778|RL21_HUMAN	2.2191	1.76507	1.44766	Factor_Treatment_CaSki_13-3L3A-biotin	CaSki_13-biotin	No	lm
AHSA1	sp|O95433|AHSA1_HUMAN	2.27423	1.76418	1.44766	Factor_Treatment_CaSki_13-3L3A-biotin	CaSki_13-biotin	No	lm
HSPA9	sp|P38646|GRP75_HUMAN	1.66901	1.75438	1.44028	Factor_Treatment_CaSki_13-3L3A-biotin	CaSki_13-biotin	No	lmer
RPLP0	sp|P05388|RLA0_HUMAN	3.41102	1.74595	1.43903	Factor_Treatment_CaSki_13-3L3A-biotin	CaSki_13-biotin	No	lmer
FLNB	sp|O75369|FLNB_HUMAN	1.5589	1.74646	1.43903	Factor_Treatment_CaSki_13-3L3A-biotin	CaSki_13-biotin	No	lmer
MAD2L1	sp|Q13257|MD2L1_HUMAN	2.12529	1.74824	1.43903	Factor_Treatment_CaSki_13-3L3A-biotin	CaSki_13-biotin	No	lm
MYL6	tr|B7Z6Z4|B7Z6Z4_HUMAN	1.48447	1.73006	1.4255	Factor_Treatment_CaSki_13-3L3A-biotin	CaSki_13-biotin	No	lm
	tr|F5H423|F5H423_HUMAN	2.78554	1.71722	1.41968	Factor_Treatment_CaSki_13-3L3A-biotin	CaSki_13-biotin	No	lm
MYL12A	tr|J3QRS3|J3QRS3_HUMAN	1.44514	1.71819	1.41968	Factor_Treatment_CaSki_13-3L3A-biotin	CaSki_13-biotin	No	lm
BSG	sp|P35613|BASI_HUMAN	2.73628	1.71965	1.41968	Factor_Treatment_CaSki_13-3L3A-biotin	CaSki_13-biotin	No	lm
TUFM	sp|P49411|EFTU_HUMAN	2.27921	1.70897	1.41375	Factor_Treatment_CaSki_13-3L3A-biotin	CaSki_13-biotin	No	lm
RPL18A	sp|Q02543|RL18A_HUMAN	3.37708	1.70308	1.41017	Factor_Treatment_CaSki_13-3L3A-biotin	CaSki_13-biotin	No	lm
PPM1G	sp|O15355|PPM1G_HUMAN	2.22953	1.70047	1.40985	Factor_Treatment_CaSki_13-3L3A-biotin	CaSki_13-biotin	No	lm
HACD3	sp|Q9P035|HACD3_HUMAN	2.5919	1.69712	1.40878	Factor_Treatment_CaSki_13-3L3A-biotin	CaSki_13-biotin	No	lm
CAPZA1	sp|P52907|CAZA1_HUMAN	3.43746	1.69091	1.40483	Factor_Treatment_CaSki_13-3L3A-biotin	CaSki_13-biotin	No	lm
CAPZB	tr|B1AK88|B1AK88_HUMAN	2.02148	1.67719	1.39444	Factor_Treatment_CaSki_13-3L3A-biotin	CaSki_13-biotin	No	lm
RPS2	sp|P15880|RS2_HUMAN	3.00862	1.67601	1.39444	Factor_Treatment_CaSki_13-3L3A-biotin	CaSki_13-biotin	No	lm
CNP	sp|P09543|CN37_HUMAN	2.66527	1.66247	1.38313	Factor_Treatment_CaSki_13-3L3A-biotin	CaSki_13-biotin	No	lm
PSMC3	sp|P17980|PRS6A_HUMAN	2.16268	1.64781	1.37069	Factor_Treatment_CaSki_13-3L3A-biotin	CaSki_13-biotin	No	lm
HEATR1	sp|Q9H583|HEAT1_HUMAN	2.16857	1.64395	1.36904	Factor_Treatment_CaSki_13-3L3A-biotin	CaSki_13-biotin	No	lm
TBC1D9B	sp|Q66K14|TBC9B_HUMAN	2.44542	1.63637	1.36366	Factor_Treatment_CaSki_13-3L3A-biotin	CaSki_13-biotin	No	lm
CKAP4	sp|Q07065|CKAP4_HUMAN	2.82683	1.62992	1.3594	Factor_Treatment_CaSki_13-3L3A-biotin	CaSki_13-biotin	No	lm
ESYT2	sp|A0FGR8|ESYT2_HUMAN	2.24804	1.62474	1.35639	Factor_Treatment_CaSki_13-3L3A-biotin	CaSki_13-biotin	No	lm
TPM1	tr|B7Z596|B7Z596_HUMAN	2.06562	1.61155	1.34537	Factor_Treatment_CaSki_13-3L3A-biotin	CaSki_13-biotin	No	lm
RPS8	sp|P62241|RS8_HUMAN	3.07431	1.59944	1.33542	Factor_Treatment_CaSki_13-3L3A-biotin	CaSki_13-biotin	No	lm
ATP5F1B	sp|P06576|ATPB_HUMAN	1.96028	1.59383	1.33259	Factor_Treatment_CaSki_13-3L3A-biotin	CaSki_13-biotin	No	lm
CCT5	sp|P48643|TCPE_HUMAN	2.095	1.59234	1.33259	Factor_Treatment_CaSki_13-3L3A-biotin	CaSki_13-biotin	No	lm
HNRNPM	sp|P52272|HNRPM_HUMAN	2.3526	1.58758	1.33159	Factor_Treatment_CaSki_13-3L3A-biotin	CaSki_13-biotin	No	lm
PRMT1	sp|Q99873|ANM1_HUMAN	2.43475	1.5871	1.33159	Factor_Treatment_CaSki_13-3L3A-biotin	CaSki_13-biotin	No	lm
RPL4	sp|P36578|RL4_HUMAN	2.9647	1.5847	1.3313	Factor_Treatment_CaSki_13-3L3A-biotin	CaSki_13-biotin	No	lm
RPL31	sp|P62899|RL31_HUMAN	2.81348	1.57704	1.32943	Factor_Treatment_CaSki_13-3L3A-biotin	CaSki_13-biotin	No	lm
TMOD3	sp|Q9NYL9|TMOD3_HUMAN	3.71383	1.57832	1.32943	Factor_Treatment_CaSki_13-3L3A-biotin	CaSki_13-biotin	No	lm
COPA	sp|P53621|COPA_HUMAN	3.33509	1.57659	1.32943	Factor_Treatment_CaSki_13-3L3A-biotin	CaSki_13-biotin	No	lm
PABPC1	sp|P11940|PABP1_HUMAN	3.13299	1.56804	1.32294	Factor_Treatment_CaSki_13-3L3A-biotin	CaSki_13-biotin	No	lm
DNAJA1	sp|P31689|DNJA1_HUMAN	1.23336	1.5628	1.32072	Factor_Treatment_CaSki_13-3L3A-biotin	CaSki_13-biotin	No	lm
RPL37	sp|P61927|RL37_HUMAN	1.27646	1.56172	1.32072	Factor_Treatment_CaSki_13-3L3A-biotin	CaSki_13-biotin	No	lm
M6PR	sp|P20645|MPRD_HUMAN	2.76583	1.55794	1.31898	Factor_Treatment_CaSki_13-3L3A-biotin	CaSki_13-biotin	No	lm
RPL6	sp|Q02878|RL6_HUMAN	2.56957	1.541	1.31578	Factor_Treatment_CaSki_13-3L3A-biotin	CaSki_13-biotin	No	lmer
CD59	sp|P13987|CD59_HUMAN	4.34662	1.54225	1.31578	Factor_Treatment_CaSki_13-3L3A-biotin	CaSki_13-biotin	No	lm
RPL7	sp|P18124|RL7_HUMAN	3.66556	1.54598	1.31578	Factor_Treatment_CaSki_13-3L3A-biotin	CaSki_13-biotin	No	lm
RPL13	sp|P26373|RL13_HUMAN	2.54482	1.54595	1.31578	Factor_Treatment_CaSki_13-3L3A-biotin	CaSki_13-biotin	No	lm
RPL17-C18orf32	tr|A0A0A6YYL6|A0A0A6YYL6_HUMAN	2.69822	1.54077	1.31578	Factor_Treatment_CaSki_13-3L3A-biotin	CaSki_13-biotin	No	lm
RPS7	sp|P62081|RS7_HUMAN	3.46195	1.55132	1.31578	Factor_Treatment_CaSki_13-3L3A-biotin	CaSki_13-biotin	No	lm
H4C1	sp|P62805|H4_HUMAN	4.02142	1.54715	1.31578	Factor_Treatment_CaSki_13-3L3A-biotin	CaSki_13-biotin	No	lm
TPM1	tr|Q6ZN40|Q6ZN40_HUMAN	1.68043	1.53067	1.30765	Factor_Treatment_CaSki_13-3L3A-biotin	CaSki_13-biotin	No	lmer
EXOC4	sp|Q96A65|EXOC4_HUMAN	2.42767	1.51872	1.29765	Factor_Treatment_CaSki_13-3L3A-biotin	CaSki_13-biotin	No	lm
RPL14	sp|P50914|RL14_HUMAN	3.20043	1.51619	1.29706	Factor_Treatment_CaSki_13-3L3A-biotin	CaSki_13-biotin	No	lm
CAPRIN1	sp|Q14444|CAPR1_HUMAN	3.225	1.51415	1.29695	Factor_Treatment_CaSki_13-3L3A-biotin	CaSki_13-biotin	No	lm
RPL11	sp|P62913|RL11_HUMAN	3.09709	1.51137	1.2961	Factor_Treatment_CaSki_13-3L3A-biotin	CaSki_13-biotin	No	lm
MPRIP	tr|A0A494BZV2|A0A494BZV2_HUMAN	3.27221	1.50791	1.29464	Factor_Treatment_CaSki_13-3L3A-biotin	CaSki_13-biotin	No	lmer
RPL23A	tr|A8MUS3|A8MUS3_HUMAN	3.233	1.50608	1.29464	Factor_Treatment_CaSki_13-3L3A-biotin	CaSki_13-biotin	No	lm
C17orf75	sp|Q9HAS0|NJMU_HUMAN	1.72386	1.48484	1.2753	Factor_Treatment_CaSki_13-3L3A-biotin	CaSki_13-biotin	No	lm
RPL10A	sp|P62906|RL10A_HUMAN	4.02523	1.48018	1.27254	Factor_Treatment_CaSki_13-3L3A-biotin	CaSki_13-biotin	No	lm
PPP6R1	sp|Q9UPN7|PP6R1_HUMAN	1.52973	1.46969	1.26767	Factor_Treatment_CaSki_13-3L3A-biotin	CaSki_13-biotin	No	lm
GNB2	sp|P62879|GBB2_HUMAN	3.62977	1.4724	1.26767	Factor_Treatment_CaSki_13-3L3A-biotin	CaSki_13-biotin	No	lm
MYO1B	sp|O43795|MYO1B_HUMAN	3.43771	1.47039	1.26767	Factor_Treatment_CaSki_13-3L3A-biotin	CaSki_13-biotin	No	lmer
RPS18	sp|P62269|RS18_HUMAN	3.0017	1.4639	1.2656	Factor_Treatment_CaSki_13-3L3A-biotin	CaSki_13-biotin	No	lm
VDAC2	sp|P45880|VDAC2_HUMAN	2.48319	1.46543	1.2656	Factor_Treatment_CaSki_13-3L3A-biotin	CaSki_13-biotin	No	lmer
IARS1	sp|P41252|SYIC_HUMAN	1.94943	1.45871	1.26225	Factor_Treatment_CaSki_13-3L3A-biotin	CaSki_13-biotin	No	lm
RPS14	sp|P62263|RS14_HUMAN	3.0604	1.45402	1.2594	Factor_Treatment_CaSki_13-3L3A-biotin	CaSki_13-biotin	No	lm
TNFAIP2	sp|Q03169|TNAP2_HUMAN	1.7589	1.44445	1.25165	Factor_Treatment_CaSki_13-3L3A-biotin	CaSki_13-biotin	No	lm
FASN	sp|P49327|FAS_HUMAN	6.86417	1.43403	1.24305	Factor_Treatment_CaSki_13-3L3A-biotin	CaSki_13-biotin	No	lm
YWHAZ	sp|P63104|1433Z_HUMAN	3.37791	1.42804	1.23888	Factor_Treatment_CaSki_13-3L3A-biotin	CaSki_13-biotin	No	lm
RPL38	sp|P63173|RL38_HUMAN	2.49627	1.42281	1.23545	Factor_Treatment_CaSki_13-3L3A-biotin	CaSki_13-biotin	No	lm
PKM	sp|P14618|KPYM_HUMAN	2.86658	1.41541	1.23105	Factor_Treatment_CaSki_13-3L3A-biotin	CaSki_13-biotin	No	lm
RPL27A	sp|P46776|RL27A_HUMAN	2.02417	1.40559	1.23105	Factor_Treatment_CaSki_13-3L3A-biotin	CaSki_13-biotin	No	lm
RPLP1	sp|P05386|RLA1_HUMAN	4.64288	1.41429	1.23105	Factor_Treatment_CaSki_13-3L3A-biotin	CaSki_13-biotin	No	lm
RPL7A	sp|P62424|RL7A_HUMAN	4.31845	1.40751	1.23105	Factor_Treatment_CaSki_13-3L3A-biotin	CaSki_13-biotin	No	lm
FLNA	sp|P21333|FLNA_HUMAN	2.03354	1.40502	1.23105	Factor_Treatment_CaSki_13-3L3A-biotin	CaSki_13-biotin	No	lmer
RPL3	sp|P39023|RL3_HUMAN	3.71858	1.40248	1.23105	Factor_Treatment_CaSki_13-3L3A-biotin	CaSki_13-biotin	No	lm
GOLGA3	sp|Q08378|GOGA3_HUMAN	0.589589	1.40991	1.23105	Factor_Treatment_CaSki_13-3L3A-biotin	CaSki_13-biotin	No	lm
IPO4	sp|Q8TEX9|IPO4_HUMAN	2.17003	1.41163	1.23105	Factor_Treatment_CaSki_13-3L3A-biotin	CaSki_13-biotin	No	lm
LDHB	tr|A0A5F9ZHM4|A0A5F9ZHM4_HUMAN	1.67405	1.40419	1.23105	Factor_Treatment_CaSki_13-3L3A-biotin	CaSki_13-biotin	No	lm
RPL30	sp|P62888|RL30_HUMAN	3.92756	1.39139	1.22765	Factor_Treatment_CaSki_13-3L3A-biotin	CaSki_13-biotin	No	lm
FKBP8	sp|Q14318|FKBP8_HUMAN	4.11198	1.38787	1.22765	Factor_Treatment_CaSki_13-3L3A-biotin	CaSki_13-biotin	No	lm
SUB1	sp|P53999|TCP4_HUMAN	2.25577	1.39611	1.22765	Factor_Treatment_CaSki_13-3L3A-biotin	CaSki_13-biotin	No	lm
VIM	sp|P08670|VIME_HUMAN	2.24556	1.38995	1.22765	Factor_Treatment_CaSki_13-3L3A-biotin	CaSki_13-biotin	No	lmer
PHB2	sp|Q99623|PHB2_HUMAN	1.72443	1.38984	1.22765	Factor_Treatment_CaSki_13-3L3A-biotin	CaSki_13-biotin	No	lm
RPS3A	sp|P61247|RS3A_HUMAN	2.86564	1.3857	1.22765	Factor_Treatment_CaSki_13-3L3A-biotin	CaSki_13-biotin	No	lm
RPL36A	tr|J3KQN4|J3KQN4_HUMAN	1.42977	1.38541	1.22765	Factor_Treatment_CaSki_13-3L3A-biotin	CaSki_13-biotin	No	lm
YWHAE	sp|P62258|1433E_HUMAN	6.0587	1.38676	1.22765	Factor_Treatment_CaSki_13-3L3A-biotin	CaSki_13-biotin	No	lm
EPRS1	sp|P07814|SYEP_HUMAN	2.07498	1.37255	1.22148	Factor_Treatment_CaSki_13-3L3A-biotin	CaSki_13-biotin	No	lm
DNAJA2	sp|O60884|DNJA2_HUMAN	2.42357	1.37358	1.22148	Factor_Treatment_CaSki_13-3L3A-biotin	CaSki_13-biotin	No	lm
SEC16A	sp|O15027|SC16A_HUMAN	3.25562	1.37634	1.22148	Factor_Treatment_CaSki_13-3L3A-biotin	CaSki_13-biotin	No	lm
RPS5	sp|P46782|RS5_HUMAN	3.55001	1.37526	1.22148	Factor_Treatment_CaSki_13-3L3A-biotin	CaSki_13-biotin	No	lm
HSP90B1	sp|P14625|ENPL_HUMAN	2.34554	1.36504	1.21562	Factor_Treatment_CaSki_13-3L3A-biotin	CaSki_13-biotin	No	lm
CFL1	tr|E9PK25|E9PK25_HUMAN	2.98096	1.35992	1.21241	Factor_Treatment_CaSki_13-3L3A-biotin	CaSki_13-biotin	No	lm
LUC7L2	tr|A0A0A6YYJ8|A0A0A6YYJ8_HUMAN	1.57162	1.35854	1.21241	Factor_Treatment_CaSki_13-3L3A-biotin	CaSki_13-biotin	No	lm
RAI14	sp|Q9P0K7|RAI14_HUMAN	3.3208	1.35551	1.21152	Factor_Treatment_CaSki_13-3L3A-biotin	CaSki_13-biotin	No	lmer
ABCB6	sp|Q9NP58|ABCB6_HUMAN	2.48392	1.35276	1.21152	Factor_Treatment_CaSki_13-3L3A-biotin	CaSki_13-biotin	No	lm
COL17A1	sp|Q9UMD9|COHA1_HUMAN	4.03851	1.3541	1.21152	Factor_Treatment_CaSki_13-3L3A-biotin	CaSki_13-biotin	No	lm
ELAVL1	sp|Q15717|ELAV1_HUMAN	3.36769	1.34009	1.20047	Factor_Treatment_CaSki_13-3L3A-biotin	CaSki_13-biotin	No	lm
ILF2	sp|Q12905|ILF2_HUMAN	2.83478	1.33034	1.19553	Factor_Treatment_CaSki_13-3L3A-biotin	CaSki_13-biotin	No	lm
DSTN	sp|P60981|DEST_HUMAN	2.81402	1.33188	1.19553	Factor_Treatment_CaSki_13-3L3A-biotin	CaSki_13-biotin	No	lm
RAE1	tr|E9PQ57|E9PQ57_HUMAN	1.54982	1.33299	1.19553	Factor_Treatment_CaSki_13-3L3A-biotin	CaSki_13-biotin	No	lm
TMPO	sp|P42167|LAP2B_HUMAN	1.79721	1.31865	1.18544	Factor_Treatment_CaSki_13-3L3A-biotin	CaSki_13-biotin	No	lm
DHCR24	tr|A0A0A0MTI1|A0A0A0MTI1_HUMAN	0.852635	1.31393	1.18231	Factor_Treatment_CaSki_13-3L3A-biotin	CaSki_13-biotin	No	lm
PTBP1	tr|A0A0U1RRM4|A0A0U1RRM4_HUMAN	1.94798	1.29518	1.16514	Factor_Treatment_CaSki_13-3L3A-biotin	CaSki_13-biotin	No	lm
NCL	sp|P19338|NUCL_HUMAN	3.6901	1.29036	1.1619	Factor_Treatment_CaSki_13-3L3A-biotin	CaSki_13-biotin	No	lm
UBC	sp|P0CG48|UBC_HUMAN	4.86194	1.28617	1.16085	Factor_Treatment_CaSki_13-3L3A-biotin	CaSki_13-biotin	No	lm
SDF4	sp|Q9BRK5|CAB45_HUMAN	1.48186	1.28696	1.16085	Factor_Treatment_CaSki_13-3L3A-biotin	CaSki_13-biotin	No	lm
RPL13A	tr|M0QYS1|M0QYS1_HUMAN	1.11941	1.28097	1.15868	Factor_Treatment_CaSki_13-3L3A-biotin	CaSki_13-biotin	No	lm
TPM4	sp|P67936|TPM4_HUMAN	2.48931	1.27935	1.15868	Factor_Treatment_CaSki_13-3L3A-biotin	CaSki_13-biotin	No	lm
SEC61B	sp|P60468|SC61B_HUMAN	2.44233	1.27942	1.15868	Factor_Treatment_CaSki_13-3L3A-biotin	CaSki_13-biotin	No	lm
SFPQ	sp|P23246|SFPQ_HUMAN	4.25388	1.26884	1.14972	Factor_Treatment_CaSki_13-3L3A-biotin	CaSki_13-biotin	No	lm
NUP62	sp|P37198|NUP62_HUMAN	1.03	1.25075	1.13316	Factor_Treatment_CaSki_13-3L3A-biotin	CaSki_13-biotin	No	lm
IPO9	sp|Q96P70|IPO9_HUMAN	2.01499	1.24547	1.12982	Factor_Treatment_CaSki_13-3L3A-biotin	CaSki_13-biotin	No	lm
RPN2	sp|P04844|RPN2_HUMAN	2.58896	1.24435	1.12982	Factor_Treatment_CaSki_13-3L3A-biotin	CaSki_13-biotin	No	lm
H2AX	sp|P16104|H2AX_HUMAN	6.21781	1.2403	1.12729	Factor_Treatment_CaSki_13-3L3A-biotin	CaSki_13-biotin	No	lm
PSMD2	sp|Q13200|PSMD2_HUMAN	2.04496	1.23186	1.12037	Factor_Treatment_CaSki_13-3L3A-biotin	CaSki_13-biotin	No	lm
BANF1	sp|O75531|BAF_HUMAN	4.35863	1.22571	1.11573	Factor_Treatment_CaSki_13-3L3A-biotin	CaSki_13-biotin	No	lm
CAV1	sp|Q03135|CAV1_HUMAN	5.09491	1.22382	1.11535	Factor_Treatment_CaSki_13-3L3A-biotin	CaSki_13-biotin	No	lm
PSMD11	sp|O00231|PSD11_HUMAN	2.65713	1.20953	1.10256	Factor_Treatment_CaSki_13-3L3A-biotin	CaSki_13-biotin	No	lm
TUBA3D	sp|P0DPH8|TBA3D_HUMAN	2.34163	1.20653	1.10105	Factor_Treatment_CaSki_13-3L3A-biotin	CaSki_13-biotin	No	lm
RBM39	sp|Q14498|RBM39_HUMAN	1.05489	1.1989	1.0949	Factor_Treatment_CaSki_13-3L3A-biotin	CaSki_13-biotin	No	lm
RTN4	sp|Q9NQC3|RTN4_HUMAN	2.13429	1.19325	1.09245	Factor_Treatment_CaSki_13-3L3A-biotin	CaSki_13-biotin	No	lm
H3-3B	tr|K7ES00|K7ES00_HUMAN	1.2364	1.19232	1.09245	Factor_Treatment_CaSki_13-3L3A-biotin	CaSki_13-biotin	No	lm
LARP1	sp|Q6PKG0|LARP1_HUMAN	3.19856	1.19201	1.09245	Factor_Treatment_CaSki_13-3L3A-biotin	CaSki_13-biotin	No	lm
DLAT	sp|P10515|ODP2_HUMAN	2.81735	1.1887	1.09061	Factor_Treatment_CaSki_13-3L3A-biotin	CaSki_13-biotin	No	lm
RPS13	sp|P62277|RS13_HUMAN	3.75043	1.18599	1.08937	Factor_Treatment_CaSki_13-3L3A-biotin	CaSki_13-biotin	No	lm
GNAI2	sp|P04899|GNAI2_HUMAN	5.98674	1.17824	1.08454	Factor_Treatment_CaSki_13-3L3A-biotin	CaSki_13-biotin	No	lm
CIP2A	tr|A0A087X211|A0A087X211_HUMAN	1.95332	1.17923	1.08454	Factor_Treatment_CaSki_13-3L3A-biotin	CaSki_13-biotin	No	lm
CLTA	sp|P09496|CLCA_HUMAN	2.72216	1.17365	1.0814	Factor_Treatment_CaSki_13-3L3A-biotin	CaSki_13-biotin	No	lm
SMN1	sp|Q16637|SMN_HUMAN	1.2962	1.16269	1.07188	Factor_Treatment_CaSki_13-3L3A-biotin	CaSki_13-biotin	No	lm
PSMC1	sp|P62191|PRS4_HUMAN	2.18109	1.15504	1.06567	Factor_Treatment_CaSki_13-3L3A-biotin	CaSki_13-biotin	No	lm
RPA3	sp|P35244|RFA3_HUMAN	2.92154	1.15335	1.06542	Factor_Treatment_CaSki_13-3L3A-biotin	CaSki_13-biotin	No	lm
DARS1	sp|P14868|SYDC_HUMAN	1.50799	1.15139	1.06488	Factor_Treatment_CaSki_13-3L3A-biotin	CaSki_13-biotin	No	lm
LRRC59	sp|Q96AG4|LRC59_HUMAN	1.60595	1.14707	1.06199	Factor_Treatment_CaSki_13-3L3A-biotin	CaSki_13-biotin	No	lm
EP400	sp|Q96L91|EP400_HUMAN	-0.466392	1.12831	1.04466	Factor_Treatment_CaSki_13-3L3A-biotin	CaSki_13-biotin	No	lm
RPA1	sp|P27694|RFA1_HUMAN	3.44768	1.10159	1.01936	Factor_Treatment_CaSki_13-3L3A-biotin	CaSki_13-biotin	No	lmer
PPFIBP1	sp|Q86W92|LIPB1_HUMAN	2.0632	1.0971	1.01627	Factor_Treatment_CaSki_13-3L3A-biotin	CaSki_13-biotin	No	lm
MSH2	tr|A0A2R8YG02|A0A2R8YG02_HUMAN	1.47219	1.09494	1.01552	Factor_Treatment_CaSki_13-3L3A-biotin	CaSki_13-biotin	No	lm
FXR1	sp|P51114|FXR1_HUMAN	3.63424	1.09291	1.01489	Factor_Treatment_CaSki_13-3L3A-biotin	CaSki_13-biotin	No	lm
ANXA2	sp|P07355|ANXA2_HUMAN	2.36226	1.06854	0.991922	Factor_Treatment_CaSki_13-3L3A-biotin	CaSki_13-biotin	No	lmer
HNRNPA2B1	sp|P22626|ROA2_HUMAN	3.1332	1.06155	0.986327	Factor_Treatment_CaSki_13-3L3A-biotin	CaSki_13-biotin	No	lm
ESYT1	sp|Q9BSJ8|ESYT1_HUMAN	1.8688	1.05492	0.981088	Factor_Treatment_CaSki_13-3L3A-biotin	CaSki_13-biotin	No	lm
BOLA2-SMG1P6	tr|H3BVE0|H3BVE0_HUMAN	2.85954	1.05121	0.980078	Factor_Treatment_CaSki_13-3L3A-biotin	CaSki_13-biotin	No	lm
CLTC	tr|A0A087WVQ6|A0A087WVQ6_HUMAN	2.85077	1.05114	0.980078	Factor_Treatment_CaSki_13-3L3A-biotin	CaSki_13-biotin	No	lmer
CCN2	sp|P29279|CCN2_HUMAN	1.31975	1.02231	0.952622	Factor_Treatment_CaSki_13-3L3A-biotin	CaSki_13-biotin	No	lm
GAPDH	sp|P04406|G3P_HUMAN	2.83268	1.02023	0.951915	Factor_Treatment_CaSki_13-3L3A-biotin	CaSki_13-biotin	No	lm
RPLP2	sp|P05387|RLA2_HUMAN	1.86282	1.0139	0.946951	Factor_Treatment_CaSki_13-3L3A-biotin	CaSki_13-biotin	No	lm
RPL22	sp|P35268|RL22_HUMAN	6.01369	1.01202	0.946437	Factor_Treatment_CaSki_13-3L3A-biotin	CaSki_13-biotin	No	lm
RBBP7	sp|Q16576|RBBP7_HUMAN	2.12811	1.00186	0.937639	Factor_Treatment_CaSki_13-3L3A-biotin	CaSki_13-biotin	No	lm
MAP1B	sp|P46821|MAP1B_HUMAN	1.83096	0.999662	0.936793	Factor_Treatment_CaSki_13-3L3A-biotin	CaSki_13-biotin	No	lm
KRAS	sp|P01116|RASK_HUMAN	2.38274	0.995466	0.933948	Factor_Treatment_CaSki_13-3L3A-biotin	CaSki_13-biotin	No	lm
CLTB	sp|P09497|CLCB_HUMAN	3.09729	0.988964	0.928793	Factor_Treatment_CaSki_13-3L3A-biotin	CaSki_13-biotin	No	lmer
PPP2R1B	sp|P30154|2AAB_HUMAN	5.16121	0.986408	0.92758	Factor_Treatment_CaSki_13-3L3A-biotin	CaSki_13-biotin	No	lm
RBM14	sp|Q96PK6|RBM14_HUMAN	2.08489	0.979865	0.922375	Factor_Treatment_CaSki_13-3L3A-biotin	CaSki_13-biotin	No	lm
SQSTM1	sp|Q13501|SQSTM_HUMAN	1.69374	0.969717	0.914891	Factor_Treatment_CaSki_13-3L3A-biotin	CaSki_13-biotin	No	lm
PCM1	sp|Q15154|PCM1_HUMAN	1.90722	0.970122	0.914891	Factor_Treatment_CaSki_13-3L3A-biotin	CaSki_13-biotin	No	lm
	tr|A0A0U1RRH7|A0A0U1RRH7_HUMAN	4.5604	0.96594	0.91244	Factor_Treatment_CaSki_13-3L3A-biotin	CaSki_13-biotin	No	lm
SELENOO	sp|Q9BVL4|SELO_HUMAN	1.5784	0.957476	0.906858	Factor_Treatment_CaSki_13-3L3A-biotin	CaSki_13-biotin	No	lm
HK2	sp|P52789|HXK2_HUMAN	1.30435	0.956404	0.906858	Factor_Treatment_CaSki_13-3L3A-biotin	CaSki_13-biotin	No	lm
EDC4	sp|Q6P2E9|EDC4_HUMAN	2.40233	0.9568	0.906858	Factor_Treatment_CaSki_13-3L3A-biotin	CaSki_13-biotin	No	lm
EIF2S1	sp|P05198|IF2A_HUMAN	6.63005	0.951805	0.903569	Factor_Treatment_CaSki_13-3L3A-biotin	CaSki_13-biotin	No	lm
S100A6	sp|P06703|S10A6_HUMAN	2.73098	0.892044	0.845114	Factor_Treatment_CaSki_13-3L3A-biotin	CaSki_13-biotin	No	lm
PAWR	sp|Q96IZ0|PAWR_HUMAN	6.38501	0.890182	0.844555	Factor_Treatment_CaSki_13-3L3A-biotin	CaSki_13-biotin	No	lm
LSM14A	sp|Q8ND56|LS14A_HUMAN	0.956243	0.888277	0.843948	Factor_Treatment_CaSki_13-3L3A-biotin	CaSki_13-biotin	No	lm
TIMM13	sp|Q9Y5L4|TIM13_HUMAN	5.31351	0.884019	0.840985	Factor_Treatment_CaSki_13-3L3A-biotin	CaSki_13-biotin	No	lm
ATXN10	sp|Q9UBB4|ATX10_HUMAN	2.37077	0.879731	0.838847	Factor_Treatment_CaSki_13-3L3A-biotin	CaSki_13-biotin	No	lm
PKP2	sp|Q99959|PKP2_HUMAN	3.2966	0.879305	0.838847	Factor_Treatment_CaSki_13-3L3A-biotin	CaSki_13-biotin	No	lm
MTOR	sp|P42345|MTOR_HUMAN	1.01925	0.870834	0.832939	Factor_Treatment_CaSki_13-3L3A-biotin	CaSki_13-biotin	No	lm
ARL6IP4	sp|Q66PJ3|AR6P4_HUMAN	0.679422	0.871028	0.832939	Factor_Treatment_CaSki_13-3L3A-biotin	CaSki_13-biotin	No	lm
RUVBL1	sp|Q9Y265|RUVB1_HUMAN	2.57065	0.862907	0.826288	Factor_Treatment_CaSki_13-3L3A-biotin	CaSki_13-biotin	No	lm
YWHAQ	sp|P27348|1433T_HUMAN	5.9443	0.852714	0.817366	Factor_Treatment_CaSki_13-3L3A-biotin	CaSki_13-biotin	No	lm
SPR	sp|P35270|SPRE_HUMAN	-1.145	0.840898	0.806818	Factor_Treatment_CaSki_13-3L3A-biotin	CaSki_13-biotin	No	lm
EFEMP1	sp|Q12805|FBLN3_HUMAN	4.42158	0.825445	0.79263	Factor_Treatment_CaSki_13-3L3A-biotin	CaSki_13-biotin	No	lm
SELENOK	sp|Q9Y6D0|SELK_HUMAN	4.33014	0.786045	0.75449	Factor_Treatment_CaSki_13-3L3A-biotin	CaSki_13-biotin	No	lm
PCCB	tr|E7EX59|E7EX59_HUMAN	-0.328179	0.777573	0.747275	Factor_Treatment_CaSki_13-3L3A-biotin	CaSki_13-biotin	No	lmer
TRIM28	sp|Q13263|TIF1B_HUMAN	1.35726	0.742791	0.713746	Factor_Treatment_CaSki_13-3L3A-biotin	CaSki_13-biotin	No	lm
TMPO	sp|P42166|LAP2A_HUMAN	2.01123	0.717743	0.689949	Factor_Treatment_CaSki_13-3L3A-biotin	CaSki_13-biotin	No	lmer
IGF2R	sp|P11717|MPRI_HUMAN	0.878264	0.709714	0.683166	Factor_Treatment_CaSki_13-3L3A-biotin	CaSki_13-biotin	No	lm
RHEB	sp|Q15382|RHEB_HUMAN	1.5411	0.61596	0.590654	Factor_Treatment_CaSki_13-3L3A-biotin	CaSki_13-biotin	No	lm
RUVBL2	sp|Q9Y230|RUVB2_HUMAN	1.60732	0.569341	0.54651	Factor_Treatment_CaSki_13-3L3A-biotin	CaSki_13-biotin	No	lm
DIABLO	sp|Q9NR28|DBLOH_HUMAN	1.50605	0.570112	0.54651	Factor_Treatment_CaSki_13-3L3A-biotin	CaSki_13-biotin	No	lm
PCNT	sp|O95613|PCNT_HUMAN	-0.233272	0.503466	0.481867	Factor_Treatment_CaSki_13-3L3A-biotin	CaSki_13-biotin	No	lm
ECH1	sp|Q13011|ECH1_HUMAN	0.389061	0.495389	0.475019	Factor_Treatment_CaSki_13-3L3A-biotin	CaSki_13-biotin	No	lm
QSOX2	sp|Q6ZRP7|QSOX2_HUMAN	1.79538	0.4856	0.466455	Factor_Treatment_CaSki_13-3L3A-biotin	CaSki_13-biotin	No	lm
MCCC2	sp|Q9HCC0|MCCB_HUMAN	0.306276	0.481421	0.463497	Factor_Treatment_CaSki_13-3L3A-biotin	CaSki_13-biotin	No	lmer
RPA2	sp|P15927|RFA2_HUMAN	1.38803	0.458621	0.441916	Factor_Treatment_CaSki_13-3L3A-biotin	CaSki_13-biotin	No	lm
NXN	sp|Q6DKJ4|NXN_HUMAN	0.301607	0.45408	0.438589	Factor_Treatment_CaSki_13-3L3A-biotin	CaSki_13-biotin	No	lm
PCCA	sp|P05165|PCCA_HUMAN	-0.220845	0.425053	0.410773	Factor_Treatment_CaSki_13-3L3A-biotin	CaSki_13-biotin	No	lmer
DBT	sp|P11182|ODB2_HUMAN	-0.373809	0.41943	0.406359	Factor_Treatment_CaSki_13-3L3A-biotin	CaSki_13-biotin	No	lm
ACACB	sp|O00763|ACACB_HUMAN	0.188843	0.415079	0.403212	Factor_Treatment_CaSki_13-3L3A-biotin	CaSki_13-biotin	No	lmer
IPO5	tr|H0Y8C6|H0Y8C6_HUMAN	1.27135	0.36807	0.357405	Factor_Treatment_CaSki_13-3L3A-biotin	CaSki_13-biotin	No	lm
RACK1	tr|D6REE5|D6REE5_HUMAN	0.528511	0.360044	0.350576	Factor_Treatment_CaSki_13-3L3A-biotin	CaSki_13-biotin	No	lm
MCCC1	sp|Q96RQ3|MCCA_HUMAN	0.253593	0.353359	0.345086	Factor_Treatment_CaSki_13-3L3A-biotin	CaSki_13-biotin	No	lmer
ACLY	sp|P53396|ACLY_HUMAN	-0.235853	0.270628	0.263547	Factor_Treatment_CaSki_13-3L3A-biotin	CaSki_13-biotin	No	lm
ACACA	sp|Q13085|ACACA_HUMAN	-0.124398	0.242717	0.236825	Factor_Treatment_CaSki_13-3L3A-biotin	CaSki_13-biotin	No	lmer
PC	sp|P11498|PYC_HUMAN	-0.168229	0.232144	0.227436	Factor_Treatment_CaSki_13-3L3A-biotin	CaSki_13-biotin	No	lmer
BIRC2	sp|Q13490|BIRC2_HUMAN	0.529213	0.230497	0.226971	Factor_Treatment_CaSki_13-3L3A-biotin	CaSki_13-biotin	No	lm
NUP88	sp|Q99567|NUP88_HUMAN	-0.416987	0.162088	0.15974	Factor_Treatment_CaSki_13-3L3A-biotin	CaSki_13-biotin	No	lm
NCEH1	tr|A0A0A0MTJ9|A0A0A0MTJ9_HUMAN	0.423433	0.0787489	0.0775767	Factor_Treatment_CaSki_13-3L3A-biotin	CaSki_13-biotin	No	lm
FAU	tr|E9PR30|E9PR30_HUMAN	-0.0373593	0.021877	0.021877	Factor_Treatment_CaSki_13-3L3A-biotin	CaSki_13-biotin	No	lm

## Sheet: CaSki DMSO vs. 13-bio
Gene	Protein	Est_Fc	Pval	Qval	Reference_condition	Comparision_condition	Is_outlier	modelFit
RPN1	sp|P04843|RPN1_HUMAN	2.32746	300	297.431	Factor_Treatment_CaSki_DMSO_control	CaSki_13-biotin	No	lmer
P4HB	sp|P07237|PDIA1_HUMAN	3.89396	12.4645	10.1961	Factor_Treatment_CaSki_DMSO_control	CaSki_13-biotin	No	lmer
PRKDC	sp|P78527|PRKDC_HUMAN	2.55482	9.33975	7.2475	Factor_Treatment_CaSki_DMSO_control	CaSki_13-biotin	No	lmer
ATP2A2	sp|P16615|AT2A2_HUMAN	2.498	6.76378	4.79646	Factor_Treatment_CaSki_DMSO_control	CaSki_13-biotin	No	lmer
UGGT1	sp|Q9NYU2|UGGG1_HUMAN	2.47806	6.08794	4.21754	Factor_Treatment_CaSki_DMSO_control	CaSki_13-biotin	No	lmer
SLC7A5	sp|Q01650|LAT1_HUMAN	1.78241	5.26495	3.47372	Factor_Treatment_CaSki_DMSO_control	CaSki_13-biotin	No	lmer
CAD	sp|P27708|PYR1_HUMAN	2.22312	5.0172	3.29292	Factor_Treatment_CaSki_DMSO_control	CaSki_13-biotin	No	lmer
AIFM1	sp|O95831|AIFM1_HUMAN	1.98237	4.64348	3.01911	Factor_Treatment_CaSki_DMSO_control	CaSki_13-biotin	No	lm
TUBA1C	tr|F5H5D3|F5H5D3_HUMAN	1.568	4.63424	3.01911	Factor_Treatment_CaSki_DMSO_control	CaSki_13-biotin	No	lmer
LDHA	sp|P00338|LDHA_HUMAN	-2.82794	4.06038	2.491	Factor_Treatment_CaSki_DMSO_control	CaSki_13-biotin	No	lm
SLC16A3	sp|O15427|MOT4_HUMAN	1.63429	3.94126	2.41328	Factor_Treatment_CaSki_DMSO_control	CaSki_13-biotin	No	lm
SLC3A2	tr|J3KPF3|J3KPF3_HUMAN	1.45167	3.66039	2.1702	Factor_Treatment_CaSki_DMSO_control	CaSki_13-biotin	No	lmer
SELENOF	sp|O60613|SEP15_HUMAN	1.53937	3.08988	1.63445	Factor_Treatment_CaSki_DMSO_control	CaSki_13-biotin	No	lm
TUBB2A	sp|Q13885|TBB2A_HUMAN	1.10278	2.94146	1.51822	Factor_Treatment_CaSki_DMSO_control	CaSki_13-biotin	No	lmer
ALG1	sp|Q9BT22|ALG1_HUMAN	3.90768	2.83594	1.44265	Factor_Treatment_CaSki_DMSO_control	CaSki_13-biotin	No	lm
XPO1	sp|O14980|XPO1_HUMAN	2.46106	2.7334	1.36814	Factor_Treatment_CaSki_DMSO_control	CaSki_13-biotin	No	lmer
TRIP13	sp|Q15645|PCH2_HUMAN	1.60685	2.6351	1.30464	Factor_Treatment_CaSki_DMSO_control	CaSki_13-biotin	No	lmer
TUBB6	sp|Q9BUF5|TBB6_HUMAN	1.22707	2.61874	1.30464	Factor_Treatment_CaSki_DMSO_control	CaSki_13-biotin	No	lmer
TXN	sp|P10599|THIO_HUMAN	2.82635	2.54624	1.2614	Factor_Treatment_CaSki_DMSO_control	CaSki_13-biotin	No	lm
EGFR	sp|P00533|EGFR_HUMAN	1.16695	2.52975	1.2614	Factor_Treatment_CaSki_DMSO_control	CaSki_13-biotin	No	lm
TXNRD1	sp|Q16881|TRXR1_HUMAN	2.25292	2.41971	1.17256	Factor_Treatment_CaSki_DMSO_control	CaSki_13-biotin	No	lmer
ASPH	sp|Q12797|ASPH_HUMAN	2.49897	2.35809	1.13114	Factor_Treatment_CaSki_DMSO_control	CaSki_13-biotin	No	lmer
HSPA1B	tr|A0A0G2JIW1|A0A0G2JIW1_HUMAN	1.19696	2.23783	1.03018	Factor_Treatment_CaSki_DMSO_control	CaSki_13-biotin	No	lmer
RCN1	sp|Q15293|RCN1_HUMAN	1.77562	2.15802	0.968857	Factor_Treatment_CaSki_DMSO_control	CaSki_13-biotin	No	lm
VAC14	sp|Q08AM6|VAC14_HUMAN	2.5152	2.08397	0.934048	Factor_Treatment_CaSki_DMSO_control	CaSki_13-biotin	No	lm
XPOT	sp|O43592|XPOT_HUMAN	2.82785	2.10477	0.934048	Factor_Treatment_CaSki_DMSO_control	CaSki_13-biotin	No	lm
GLRX3	sp|O76003|GLRX3_HUMAN	1.93171	2.07206	0.934048	Factor_Treatment_CaSki_DMSO_control	CaSki_13-biotin	No	lmer
COPB1	sp|P53618|COPB_HUMAN	0.859761	2.03237	0.910156	Factor_Treatment_CaSki_DMSO_control	CaSki_13-biotin	No	lm
SLC25A4	sp|P12235|ADT1_HUMAN	1.13414	1.99014	0.883164	Factor_Treatment_CaSki_DMSO_control	CaSki_13-biotin	No	lm
ATL3	sp|Q6DD88|ATLA3_HUMAN	1.50086	1.96192	0.872852	Factor_Treatment_CaSki_DMSO_control	CaSki_13-biotin	No	lm
HSPA5	sp|P11021|BIP_HUMAN	1.57363	1.95013	0.872852	Factor_Treatment_CaSki_DMSO_control	CaSki_13-biotin	No	lmer
HSD17B12	sp|Q53GQ0|DHB12_HUMAN	1.18777	1.93708	0.872852	Factor_Treatment_CaSki_DMSO_control	CaSki_13-biotin	No	lm
MAN1B1	sp|Q9UKM7|MA1B1_HUMAN	5.51794	1.86521	0.829623	Factor_Treatment_CaSki_DMSO_control	CaSki_13-biotin	No	lm
HSPA8	sp|P11142|HSP7C_HUMAN	1.29014	1.87944	0.829623	Factor_Treatment_CaSki_DMSO_control	CaSki_13-biotin	No	lmer
BZW1	sp|Q7L1Q6|BZW1_HUMAN	1.74028	1.85493	0.829623	Factor_Treatment_CaSki_DMSO_control	CaSki_13-biotin	No	lm
ARFGEF1	sp|Q9Y6D6|BIG1_HUMAN	3.00078	1.76064	0.747569	Factor_Treatment_CaSki_DMSO_control	CaSki_13-biotin	No	lmer
TUBA4A	sp|P68366|TBA4A_HUMAN	1.53064	1.71462	0.747303	Factor_Treatment_CaSki_DMSO_control	CaSki_13-biotin	No	lm
CSE1L	sp|P55060|XPO2_HUMAN	2.5024	1.74355	0.747303	Factor_Treatment_CaSki_DMSO_control	CaSki_13-biotin	No	lm
PHGDH	sp|O43175|SERA_HUMAN	1.57884	1.72619	0.747303	Factor_Treatment_CaSki_DMSO_control	CaSki_13-biotin	No	lmer
RCN2	sp|Q14257|RCN2_HUMAN	1.84279	1.71813	0.747303	Factor_Treatment_CaSki_DMSO_control	CaSki_13-biotin	No	lmer
GCN1	sp|Q92616|GCN1_HUMAN	1.71608	1.69168	0.735087	Factor_Treatment_CaSki_DMSO_control	CaSki_13-biotin	No	lmer
ESYT1	sp|Q9BSJ8|ESYT1_HUMAN	8.75596	1.62071	0.674583	Factor_Treatment_CaSki_DMSO_control	CaSki_13-biotin	No	lm
DNAJB11	sp|Q9UBS4|DJB11_HUMAN	1.32663	1.56682	0.630918	Factor_Treatment_CaSki_DMSO_control	CaSki_13-biotin	No	lm
NXN	sp|Q6DKJ4|NXN_HUMAN	4.27542	1.54141	0.625251	Factor_Treatment_CaSki_DMSO_control	CaSki_13-biotin	No	lm
NUP93	tr|H3BVG0|H3BVG0_HUMAN	1.17266	1.5459	0.625251	Factor_Treatment_CaSki_DMSO_control	CaSki_13-biotin	No	lm
SPTLC2	sp|O15270|SPTC2_HUMAN	2.76754	1.50128	0.594665	Factor_Treatment_CaSki_DMSO_control	CaSki_13-biotin	No	lm
SPR	sp|P35270|SPRE_HUMAN	2.88685	1.46913	0.571857	Factor_Treatment_CaSki_DMSO_control	CaSki_13-biotin	No	lm
GEMIN4	sp|P57678|GEMI4_HUMAN	1.93981	1.45986	0.571732	Factor_Treatment_CaSki_DMSO_control	CaSki_13-biotin	No	lmer
AHNAK	sp|Q09666|AHNK_HUMAN	1.10169	1.37691	0.536996	Factor_Treatment_CaSki_DMSO_control	CaSki_13-biotin	No	lmer
KPNB1	sp|Q14974|IMB1_HUMAN	1.42338	1.37398	0.536996	Factor_Treatment_CaSki_DMSO_control	CaSki_13-biotin	No	lmer
HSPB1	sp|P04792|HSPB1_HUMAN	0.824418	1.39848	0.536996	Factor_Treatment_CaSki_DMSO_control	CaSki_13-biotin	No	lmer
CCN1	sp|O00622|CCN1_HUMAN	1.43719	1.41557	0.536996	Factor_Treatment_CaSki_DMSO_control	CaSki_13-biotin	No	lm
HSPD1	sp|P10809|CH60_HUMAN	1.60524	1.38047	0.536996	Factor_Treatment_CaSki_DMSO_control	CaSki_13-biotin	No	lmer
RTRAF	sp|Q9Y224|RTRAF_HUMAN	5.31916	1.39075	0.536996	Factor_Treatment_CaSki_DMSO_control	CaSki_13-biotin	No	lm
PDIA6	sp|Q15084|PDIA6_HUMAN	4.00431	1.33118	0.50217	Factor_Treatment_CaSki_DMSO_control	CaSki_13-biotin	No	lm
DYNC1H1	sp|Q14204|DYHC1_HUMAN	0.928359	1.30725	0.492363	Factor_Treatment_CaSki_DMSO_control	CaSki_13-biotin	No	lmer
PRDX4	sp|Q13162|PRDX4_HUMAN	1.97694	1.30586	0.492363	Factor_Treatment_CaSki_DMSO_control	CaSki_13-biotin	No	lm
SELENOO	sp|Q9BVL4|SELO_HUMAN	5.74868	1.28603	0.490289	Factor_Treatment_CaSki_DMSO_control	CaSki_13-biotin	No	lm
EEF1A1	sp|P68104|EF1A1_HUMAN	1.13721	1.28746	0.490289	Factor_Treatment_CaSki_DMSO_control	CaSki_13-biotin	No	lmer
LTN1	sp|O94822|LTN1_HUMAN	1.4699	1.28151	0.490289	Factor_Treatment_CaSki_DMSO_control	CaSki_13-biotin	No	lm
MBOAT7	sp|Q96N66|MBOA7_HUMAN	1.60556	1.26163	0.477583	Factor_Treatment_CaSki_DMSO_control	CaSki_13-biotin	No	lm
TUBB4B	sp|P68371|TBB4B_HUMAN	1.22222	1.23769	0.460709	Factor_Treatment_CaSki_DMSO_control	CaSki_13-biotin	No	lmer
NCAPD2	sp|Q15021|CND1_HUMAN	2.8245	1.21255	0.442513	Factor_Treatment_CaSki_DMSO_control	CaSki_13-biotin	No	lm
SCD	sp|O00767|ACOD_HUMAN	1.5948	1.15896	0.426155	Factor_Treatment_CaSki_DMSO_control	CaSki_13-biotin	No	lm
ITGA3	sp|P26006|ITA3_HUMAN	2.32099	1.165	0.426155	Factor_Treatment_CaSki_DMSO_control	CaSki_13-biotin	No	lm
DBT	sp|P11182|ODB2_HUMAN	0.967596	1.16228	0.426155	Factor_Treatment_CaSki_DMSO_control	CaSki_13-biotin	No	lm
STT3A	sp|P46977|STT3A_HUMAN	1.41444	1.15511	0.426155	Factor_Treatment_CaSki_DMSO_control	CaSki_13-biotin	No	lm
CALU	sp|O43852|CALU_HUMAN	0.914709	1.17659	0.426155	Factor_Treatment_CaSki_DMSO_control	CaSki_13-biotin	No	lmer
IGF2BP1	sp|Q9NZI8|IF2B1_HUMAN	1.40227	1.15327	0.426155	Factor_Treatment_CaSki_DMSO_control	CaSki_13-biotin	No	lm
SLC25A5	sp|P05141|ADT2_HUMAN	1.17669	1.15043	0.426155	Factor_Treatment_CaSki_DMSO_control	CaSki_13-biotin	No	lm
TBC1D9B	sp|Q66K14|TBC9B_HUMAN	5.33874	1.11562	0.403581	Factor_Treatment_CaSki_DMSO_control	CaSki_13-biotin	No	lm
SMN1	sp|Q16637|SMN_HUMAN	3.28609	1.11784	0.403581	Factor_Treatment_CaSki_DMSO_control	CaSki_13-biotin	No	lm
SMC2	sp|O95347|SMC2_HUMAN	3.10461	1.10202	0.398107	Factor_Treatment_CaSki_DMSO_control	CaSki_13-biotin	No	lm
PPP6R3	sp|Q5H9R7|PP6R3_HUMAN	1.70488	1.09825	0.398107	Factor_Treatment_CaSki_DMSO_control	CaSki_13-biotin	No	lm
ECPAS	tr|J3KN16|J3KN16_HUMAN	2.97483	1.07358	0.385024	Factor_Treatment_CaSki_DMSO_control	CaSki_13-biotin	No	lm
SEC13	sp|P55735|SEC13_HUMAN	0.983631	1.07826	0.385024	Factor_Treatment_CaSki_DMSO_control	CaSki_13-biotin	No	lm
CTNNB1	tr|A0A2R8Y5A3|A0A2R8Y5A3_HUMAN	1.34729	1.02449	0.345765	Factor_Treatment_CaSki_DMSO_control	CaSki_13-biotin	No	lm
MSH6	sp|P52701|MSH6_HUMAN	1.7175	1.01751	0.345765	Factor_Treatment_CaSki_DMSO_control	CaSki_13-biotin	No	lm
LDHB	tr|A0A5F9ZHM4|A0A5F9ZHM4_HUMAN	-1.31407	1.02271	0.345765	Factor_Treatment_CaSki_DMSO_control	CaSki_13-biotin	No	lm
TNPO1	sp|Q92973|TNPO1_HUMAN	2.06559	1.00976	0.343478	Factor_Treatment_CaSki_DMSO_control	CaSki_13-biotin	No	lmer
IQGAP3	sp|Q86VI3|IQGA3_HUMAN	1.50188	0.98931	0.330583	Factor_Treatment_CaSki_DMSO_control	CaSki_13-biotin	No	lm
UQCRC2	sp|P22695|QCR2_HUMAN	1.66446	0.976087	0.330583	Factor_Treatment_CaSki_DMSO_control	CaSki_13-biotin	No	lm
TMX1	sp|Q9H3N1|TMX1_HUMAN	2.42724	0.975678	0.330583	Factor_Treatment_CaSki_DMSO_control	CaSki_13-biotin	No	lm
CCT6A	sp|P40227|TCPZ_HUMAN	3.01081	0.977888	0.330583	Factor_Treatment_CaSki_DMSO_control	CaSki_13-biotin	No	lm
TUBB	sp|P07437|TBB5_HUMAN	1.20217	0.959412	0.319457	Factor_Treatment_CaSki_DMSO_control	CaSki_13-biotin	No	lmer
SQSTM1	sp|Q13501|SQSTM_HUMAN	3.54029	0.952233	0.317358	Factor_Treatment_CaSki_DMSO_control	CaSki_13-biotin	No	lm
ATP5F1A	sp|P25705|ATPA_HUMAN	1.0684	0.924228	0.297857	Factor_Treatment_CaSki_DMSO_control	CaSki_13-biotin	No	lmer
SDF4	sp|Q9BRK5|CAB45_HUMAN	3.56865	0.922749	0.297857	Factor_Treatment_CaSki_DMSO_control	CaSki_13-biotin	No	lm
NUP214	sp|P35658|NU214_HUMAN	0.590127	0.917021	0.297037	Factor_Treatment_CaSki_DMSO_control	CaSki_13-biotin	No	lm
EP400	sp|Q96L91|EP400_HUMAN	0.379148	0.905899	0.295567	Factor_Treatment_CaSki_DMSO_control	CaSki_13-biotin	No	lm
MTOR	sp|P42345|MTOR_HUMAN	4.01934	0.908239	0.295567	Factor_Treatment_CaSki_DMSO_control	CaSki_13-biotin	No	lm
TOR1AIP2	sp|Q8NFQ8|TOIP2_HUMAN	1.29487	0.900589	0.295003	Factor_Treatment_CaSki_DMSO_control	CaSki_13-biotin	No	lm
BAG2	sp|O95816|BAG2_HUMAN	1.04345	0.883241	0.286995	Factor_Treatment_CaSki_DMSO_control	CaSki_13-biotin	No	lm
SLC16A1	sp|P53985|MOT1_HUMAN	1.12397	0.886525	0.286995	Factor_Treatment_CaSki_DMSO_control	CaSki_13-biotin	No	lm
NUP205	sp|Q92621|NU205_HUMAN	2.88671	0.872427	0.280777	Factor_Treatment_CaSki_DMSO_control	CaSki_13-biotin	No	lm
DARS1	sp|P14868|SYDC_HUMAN	2.2613	0.864803	0.2777	Factor_Treatment_CaSki_DMSO_control	CaSki_13-biotin	No	lm
TUBAL3	sp|A6NHL2|TBAL3_HUMAN	1.39623	0.850181	0.267579	Factor_Treatment_CaSki_DMSO_control	CaSki_13-biotin	No	lm
SEC61A1	tr|B4DR61|B4DR61_HUMAN	0.847724	0.831929	0.253781	Factor_Treatment_CaSki_DMSO_control	CaSki_13-biotin	No	lm
FAM83H	tr|A0A494C1T9|A0A494C1T9_HUMAN	1.7487	0.817925	0.248551	Factor_Treatment_CaSki_DMSO_control	CaSki_13-biotin	No	lmer
PCNT	sp|O95613|PCNT_HUMAN	0.35167	0.818337	0.248551	Factor_Treatment_CaSki_DMSO_control	CaSki_13-biotin	No	lm
HNRNPA2B1	sp|P22626|ROA2_HUMAN	-2.45449	0.791314	0.233384	Factor_Treatment_CaSki_DMSO_control	CaSki_13-biotin	No	lm
SLC1A5	sp|Q15758|AAAT_HUMAN	1.24954	0.796868	0.233384	Factor_Treatment_CaSki_DMSO_control	CaSki_13-biotin	No	lm
DHCR24	tr|A0A0A0MTI1|A0A0A0MTI1_HUMAN	0.706132	0.788287	0.233384	Factor_Treatment_CaSki_DMSO_control	CaSki_13-biotin	No	lm
NCEH1	tr|A0A0A0MTJ9|A0A0A0MTJ9_HUMAN	4.21459	0.785724	0.233384	Factor_Treatment_CaSki_DMSO_control	CaSki_13-biotin	No	lm
TMPO	sp|P42167|LAP2B_HUMAN	2.33937	0.75733	0.217277	Factor_Treatment_CaSki_DMSO_control	CaSki_13-biotin	No	lm
HM13	tr|A0A3B3IUB5|A0A3B3IUB5_HUMAN	1.64521	0.764962	0.217277	Factor_Treatment_CaSki_DMSO_control	CaSki_13-biotin	No	lm
PPP6C	sp|O00743|PPP6_HUMAN	1.89742	0.756648	0.217277	Factor_Treatment_CaSki_DMSO_control	CaSki_13-biotin	No	lm
PGAM5	sp|Q96HS1|PGAM5_HUMAN	0.918458	0.753227	0.217277	Factor_Treatment_CaSki_DMSO_control	CaSki_13-biotin	No	lm
ARF4	sp|P18085|ARF4_HUMAN	1.20663	0.734643	0.213287	Factor_Treatment_CaSki_DMSO_control	CaSki_13-biotin	No	lm
ARL1	tr|F8VYN9|F8VYN9_HUMAN	1.76236	0.741625	0.213287	Factor_Treatment_CaSki_DMSO_control	CaSki_13-biotin	No	lm
ACACB	sp|O00763|ACACB_HUMAN	0.292639	0.733443	0.213287	Factor_Treatment_CaSki_DMSO_control	CaSki_13-biotin	No	lmer
MAGED2	sp|Q9UNF1|MAGD2_HUMAN	1.92947	0.739608	0.213287	Factor_Treatment_CaSki_DMSO_control	CaSki_13-biotin	No	lm
HEATR1	sp|Q9H583|HEAT1_HUMAN	2.56583	0.726036	0.20974	Factor_Treatment_CaSki_DMSO_control	CaSki_13-biotin	No	lm
MAD2L1	sp|Q13257|MD2L1_HUMAN	1.75398	0.720268	0.207799	Factor_Treatment_CaSki_DMSO_control	CaSki_13-biotin	No	lm
TMEM165	sp|Q9HC07|TM165_HUMAN	2.08143	0.711499	0.202823	Factor_Treatment_CaSki_DMSO_control	CaSki_13-biotin	No	lm
NUP62	sp|P37198|NUP62_HUMAN	0.83231	0.683121	0.202731	Factor_Treatment_CaSki_DMSO_control	CaSki_13-biotin	No	lm
TPM3	tr|A0A087WWU8|A0A087WWU8_HUMAN	1.86193	0.671735	0.202731	Factor_Treatment_CaSki_DMSO_control	CaSki_13-biotin	No	lm
GAPDH	sp|P04406|G3P_HUMAN	6.99627	0.701917	0.202731	Factor_Treatment_CaSki_DMSO_control	CaSki_13-biotin	No	lm
MARCKS	sp|P29966|MARCS_HUMAN	1.18732	0.702611	0.202731	Factor_Treatment_CaSki_DMSO_control	CaSki_13-biotin	No	lm
CDK1	sp|P06493|CDK1_HUMAN	0.845414	0.697154	0.202731	Factor_Treatment_CaSki_DMSO_control	CaSki_13-biotin	No	lm
GOLGA3	sp|Q08378|GOGA3_HUMAN	-0.324206	0.67203	0.202731	Factor_Treatment_CaSki_DMSO_control	CaSki_13-biotin	No	lm
ATXN10	sp|Q9UBB4|ATX10_HUMAN	4.09725	0.693831	0.202731	Factor_Treatment_CaSki_DMSO_control	CaSki_13-biotin	No	lm
CAND1	sp|Q86VP6|CAND1_HUMAN	0.911765	0.689305	0.202731	Factor_Treatment_CaSki_DMSO_control	CaSki_13-biotin	No	lmer
YBX1	tr|H0Y449|H0Y449_HUMAN	1.61416	0.678675	0.202731	Factor_Treatment_CaSki_DMSO_control	CaSki_13-biotin	No	lm
TPM1	tr|Q6ZN40|Q6ZN40_HUMAN	0.963859	0.67929	0.202731	Factor_Treatment_CaSki_DMSO_control	CaSki_13-biotin	No	lmer
TIMM50	sp|Q3ZCQ8|TIM50_HUMAN	1.46228	0.691637	0.202731	Factor_Treatment_CaSki_DMSO_control	CaSki_13-biotin	No	lm
PPP6R1	sp|Q9UPN7|PP6R1_HUMAN	1.57039	0.659162	0.197592	Factor_Treatment_CaSki_DMSO_control	CaSki_13-biotin	No	lm
ESRP1	sp|Q6NXG1|ESRP1_HUMAN	1.69818	0.656585	0.197592	Factor_Treatment_CaSki_DMSO_control	CaSki_13-biotin	No	lm
HSPA9	sp|P38646|GRP75_HUMAN	0.899258	0.656376	0.197592	Factor_Treatment_CaSki_DMSO_control	CaSki_13-biotin	No	lmer
BZW2	sp|Q9Y6E2|BZW2_HUMAN	0.89565	0.643995	0.192342	Factor_Treatment_CaSki_DMSO_control	CaSki_13-biotin	No	lm
PCM1	sp|Q15154|PCM1_HUMAN	3.9684	0.641142	0.192342	Factor_Treatment_CaSki_DMSO_control	CaSki_13-biotin	No	lm
RPN2	sp|P04844|RPN2_HUMAN	3.21988	0.644345	0.192342	Factor_Treatment_CaSki_DMSO_control	CaSki_13-biotin	No	lm
ILF2	sp|Q12905|ILF2_HUMAN	3.95505	0.600259	0.182233	Factor_Treatment_CaSki_DMSO_control	CaSki_13-biotin	No	lm
RPLP2	sp|P05387|RLA2_HUMAN	4.36842	0.60761	0.182233	Factor_Treatment_CaSki_DMSO_control	CaSki_13-biotin	No	lm
PCCB	tr|E7EX59|E7EX59_HUMAN	0.272754	0.602726	0.182233	Factor_Treatment_CaSki_DMSO_control	CaSki_13-biotin	No	lmer
ATP5F1B	sp|P06576|ATPB_HUMAN	1.45557	0.610711	0.182233	Factor_Treatment_CaSki_DMSO_control	CaSki_13-biotin	No	lm
ICAM1	sp|P05362|ICAM1_HUMAN	0.452207	0.623394	0.182233	Factor_Treatment_CaSki_DMSO_control	CaSki_13-biotin	No	lm
M6PR	sp|P20645|MPRD_HUMAN	2.66473	0.601604	0.182233	Factor_Treatment_CaSki_DMSO_control	CaSki_13-biotin	No	lm
SERPINE1	sp|P05121|PAI1_HUMAN	0.972654	0.596271	0.182233	Factor_Treatment_CaSki_DMSO_control	CaSki_13-biotin	No	lm
FASN	sp|P49327|FAS_HUMAN	-4.64554	0.617444	0.182233	Factor_Treatment_CaSki_DMSO_control	CaSki_13-biotin	No	lm
PTBP1	tr|A0A0U1RRM4|A0A0U1RRM4_HUMAN	3.92929	0.626112	0.182233	Factor_Treatment_CaSki_DMSO_control	CaSki_13-biotin	No	lm
LGALS1	sp|P09382|LEG1_HUMAN	1.94731	0.597254	0.182233	Factor_Treatment_CaSki_DMSO_control	CaSki_13-biotin	No	lm
DIABLO	sp|Q9NR28|DBLOH_HUMAN	4.39966	0.617743	0.182233	Factor_Treatment_CaSki_DMSO_control	CaSki_13-biotin	No	lm
HNRNPM	sp|P52272|HNRPM_HUMAN	3.30023	0.590419	0.181963	Factor_Treatment_CaSki_DMSO_control	CaSki_13-biotin	No	lm
XIAP	sp|P98170|XIAP_HUMAN	0.982985	0.589968	0.181963	Factor_Treatment_CaSki_DMSO_control	CaSki_13-biotin	No	lm
SQOR	sp|Q9Y6N5|SQOR_HUMAN	1.46212	0.582595	0.177574	Factor_Treatment_CaSki_DMSO_control	CaSki_13-biotin	No	lm
RBBP7	sp|Q16576|RBBP7_HUMAN	3.74928	0.578453	0.176397	Factor_Treatment_CaSki_DMSO_control	CaSki_13-biotin	No	lm
RICTOR	sp|Q6R327|RICTR_HUMAN	0.949001	0.573717	0.174605	Factor_Treatment_CaSki_DMSO_control	CaSki_13-biotin	No	lm
THBS1	sp|P07996|TSP1_HUMAN	0.836948	0.566839	0.170651	Factor_Treatment_CaSki_DMSO_control	CaSki_13-biotin	No	lm
AKAP8L	sp|Q9ULX6|AKP8L_HUMAN	1.57461	0.556126	0.162844	Factor_Treatment_CaSki_DMSO_control	CaSki_13-biotin	No	lm
NME1-NME2	tr|Q32Q12|Q32Q12_HUMAN	1.13062	0.539651	0.149254	Factor_Treatment_CaSki_DMSO_control	CaSki_13-biotin	No	lm
TNFAIP2	sp|Q03169|TNAP2_HUMAN	1.37813	0.532176	0.147494	Factor_Treatment_CaSki_DMSO_control	CaSki_13-biotin	No	lm
	tr|J3KR12|J3KR12_HUMAN	1.92696	0.533376	0.147494	Factor_Treatment_CaSki_DMSO_control	CaSki_13-biotin	No	lm
EMD	sp|P50402|EMD_HUMAN	2.04008	0.522244	0.140391	Factor_Treatment_CaSki_DMSO_control	CaSki_13-biotin	No	lm
ACACA	sp|Q13085|ACACA_HUMAN	0.223836	0.508747	0.129705	Factor_Treatment_CaSki_DMSO_control	CaSki_13-biotin	No	lmer
TMX3	sp|Q96JJ7|TMX3_HUMAN	1.79189	0.502429	0.126179	Factor_Treatment_CaSki_DMSO_control	CaSki_13-biotin	No	lm
ABCB6	sp|Q9NP58|ABCB6_HUMAN	3.29297	0.493984	0.12051	Factor_Treatment_CaSki_DMSO_control	CaSki_13-biotin	No	lm
EIF4A1	sp|P60842|IF4A1_HUMAN	1.22682	0.484644	0.113927	Factor_Treatment_CaSki_DMSO_control	CaSki_13-biotin	No	lm
C17orf75	sp|Q9HAS0|NJMU_HUMAN	1.12678	0.46553	0.109921	Factor_Treatment_CaSki_DMSO_control	CaSki_13-biotin	No	lm
IARS1	sp|P41252|SYIC_HUMAN	1.34709	0.465209	0.109921	Factor_Treatment_CaSki_DMSO_control	CaSki_13-biotin	No	lm
DNAJA1	sp|P31689|DNJA1_HUMAN	0.583077	0.470793	0.109921	Factor_Treatment_CaSki_DMSO_control	CaSki_13-biotin	No	lm
TUBA1A	sp|Q71U36|TBA1A_HUMAN	0.558994	0.474667	0.109921	Factor_Treatment_CaSki_DMSO_control	CaSki_13-biotin	No	lm
RPL23	sp|P62829|RL23_HUMAN	0.757523	0.456578	0.109921	Factor_Treatment_CaSki_DMSO_control	CaSki_13-biotin	No	lm
LRRC59	sp|Q96AG4|LRC59_HUMAN	1.37168	0.457703	0.109921	Factor_Treatment_CaSki_DMSO_control	CaSki_13-biotin	No	lm
ARL6IP4	sp|Q66PJ3|AR6P4_HUMAN	0.482864	0.456861	0.109921	Factor_Treatment_CaSki_DMSO_control	CaSki_13-biotin	No	lm
RPL12	sp|P30050|RL12_HUMAN	0.823916	0.461516	0.109921	Factor_Treatment_CaSki_DMSO_control	CaSki_13-biotin	No	lm
SERPINH1	sp|P50454|SERPH_HUMAN	1.03242	0.476706	0.109921	Factor_Treatment_CaSki_DMSO_control	CaSki_13-biotin	No	lm
ESYT2	sp|A0FGR8|ESYT2_HUMAN	1.45627	0.445435	0.10137	Factor_Treatment_CaSki_DMSO_control	CaSki_13-biotin	No	lm
VCP	sp|P55072|TERA_HUMAN	1.2221	0.439802	0.0983149	Factor_Treatment_CaSki_DMSO_control	CaSki_13-biotin	No	lm
CLTA	sp|P09496|CLCA_HUMAN	2.15648	0.431541	0.0982726	Factor_Treatment_CaSki_DMSO_control	CaSki_13-biotin	No	lm
BIRC2	sp|Q13490|BIRC2_HUMAN	3.80295	0.430419	0.0982726	Factor_Treatment_CaSki_DMSO_control	CaSki_13-biotin	No	lm
RPS4X	sp|P62701|RS4X_HUMAN	-0.37634	0.434302	0.0982726	Factor_Treatment_CaSki_DMSO_control	CaSki_13-biotin	No	lm
RACK1	tr|D6REE5|D6REE5_HUMAN	0.733197	0.4296	0.0982726	Factor_Treatment_CaSki_DMSO_control	CaSki_13-biotin	No	lm
PC	sp|P11498|PYC_HUMAN	-0.270081	0.423488	0.094663	Factor_Treatment_CaSki_DMSO_control	CaSki_13-biotin	No	lmer
SFPQ	sp|P23246|SFPQ_HUMAN	3.52589	0.419968	0.0936325	Factor_Treatment_CaSki_DMSO_control	CaSki_13-biotin	No	lm
PSMC3	sp|P17980|PRS6A_HUMAN	0.994688	0.404548	0.0919251	Factor_Treatment_CaSki_DMSO_control	CaSki_13-biotin	No	lm
CAPZB	tr|B1AK88|B1AK88_HUMAN	0.878369	0.400672	0.0919251	Factor_Treatment_CaSki_DMSO_control	CaSki_13-biotin	No	lm
EPRS1	sp|P07814|SYEP_HUMAN	1.23871	0.412576	0.0919251	Factor_Treatment_CaSki_DMSO_control	CaSki_13-biotin	No	lm
RAN	tr|J3KQE5|J3KQE5_HUMAN	0.762216	0.406576	0.0919251	Factor_Treatment_CaSki_DMSO_control	CaSki_13-biotin	No	lm
SLC25A3	sp|Q00325|MPCP_HUMAN	0.760547	0.399893	0.0919251	Factor_Treatment_CaSki_DMSO_control	CaSki_13-biotin	No	lm
TMPO	sp|P42166|LAP2A_HUMAN	1.28768	0.399966	0.0919251	Factor_Treatment_CaSki_DMSO_control	CaSki_13-biotin	No	lmer
CAPRIN1	sp|Q14444|CAPR1_HUMAN	2.02713	0.401193	0.0919251	Factor_Treatment_CaSki_DMSO_control	CaSki_13-biotin	No	lm
DLST	sp|P36957|ODO2_HUMAN	0.411875	0.398848	0.0919251	Factor_Treatment_CaSki_DMSO_control	CaSki_13-biotin	No	lmer
TPM1	tr|B7Z596|B7Z596_HUMAN	0.936064	0.389354	0.0915303	Factor_Treatment_CaSki_DMSO_control	CaSki_13-biotin	No	lm
RPS26P11	sp|Q5JNZ5|RS26L_HUMAN	0.762633	0.387155	0.0915303	Factor_Treatment_CaSki_DMSO_control	CaSki_13-biotin	No	lm
PHB2	sp|Q99623|PHB2_HUMAN	0.853995	0.389175	0.0915303	Factor_Treatment_CaSki_DMSO_control	CaSki_13-biotin	No	lm
LIMA1	sp|Q9UHB6|LIMA1_HUMAN	-0.306991	0.386746	0.0915303	Factor_Treatment_CaSki_DMSO_control	CaSki_13-biotin	No	lm
MSH2	tr|A0A2R8YG02|A0A2R8YG02_HUMAN	2.31427	0.39065	0.0915303	Factor_Treatment_CaSki_DMSO_control	CaSki_13-biotin	No	lm
RPL6	sp|Q02878|RL6_HUMAN	1.00072	0.379896	0.089276	Factor_Treatment_CaSki_DMSO_control	CaSki_13-biotin	No	lmer
TPM4	sp|P67936|TPM4_HUMAN	1.66962	0.380755	0.089276	Factor_Treatment_CaSki_DMSO_control	CaSki_13-biotin	No	lm
EEF2	sp|P13639|EF2_HUMAN	0.769972	0.376039	0.0876985	Factor_Treatment_CaSki_DMSO_control	CaSki_13-biotin	No	lmer
CCT5	sp|P48643|TCPE_HUMAN	1.01173	0.370402	0.087621	Factor_Treatment_CaSki_DMSO_control	CaSki_13-biotin	No	lm
HACD3	sp|Q9P035|HACD3_HUMAN	1.82195	0.370381	0.087621	Factor_Treatment_CaSki_DMSO_control	CaSki_13-biotin	No	lm
TECR	tr|M0R2N5|M0R2N5_HUMAN	0.603313	0.369193	0.087621	Factor_Treatment_CaSki_DMSO_control	CaSki_13-biotin	No	lm
IPO9	sp|Q96P70|IPO9_HUMAN	1.35289	0.35223	0.0798301	Factor_Treatment_CaSki_DMSO_control	CaSki_13-biotin	No	lm
CCN2	sp|P29279|CCN2_HUMAN	0.850788	0.350706	0.0798301	Factor_Treatment_CaSki_DMSO_control	CaSki_13-biotin	No	lm
RPL21	sp|P46778|RL21_HUMAN	0.804603	0.343853	0.0798301	Factor_Treatment_CaSki_DMSO_control	CaSki_13-biotin	No	lm
NUP88	sp|Q99567|NUP88_HUMAN	0.91156	0.345361	0.0798301	Factor_Treatment_CaSki_DMSO_control	CaSki_13-biotin	No	lm
DNAJA2	sp|O60884|DNJA2_HUMAN	1.3165	0.35013	0.0798301	Factor_Treatment_CaSki_DMSO_control	CaSki_13-biotin	No	lm
TUFM	sp|P49411|EFTU_HUMAN	1.07429	0.345819	0.0798301	Factor_Treatment_CaSki_DMSO_control	CaSki_13-biotin	No	lm
EDC4	sp|Q6P2E9|EDC4_HUMAN	2.46645	0.345231	0.0798301	Factor_Treatment_CaSki_DMSO_control	CaSki_13-biotin	No	lm
XPO5	sp|Q9HAV4|XPO5_HUMAN	0.856878	0.355299	0.0798301	Factor_Treatment_CaSki_DMSO_control	CaSki_13-biotin	No	lm
ECH1	sp|Q13011|ECH1_HUMAN	0.321867	0.341353	0.0794751	Factor_Treatment_CaSki_DMSO_control	CaSki_13-biotin	No	lm
HNRNPF	sp|P52597|HNRPF_HUMAN	2.13463	0.338979	0.0792355	Factor_Treatment_CaSki_DMSO_control	CaSki_13-biotin	No	lm
IMMT	sp|Q16891|MIC60_HUMAN	1.90342	0.32193	0.0663667	Factor_Treatment_CaSki_DMSO_control	CaSki_13-biotin	No	lm
ERLIN1	sp|O75477|ERLN1_HUMAN	1.41139	0.321873	0.0663667	Factor_Treatment_CaSki_DMSO_control	CaSki_13-biotin	No	lm
CSNK1A1	tr|A0A590UJ43|A0A590UJ43_HUMAN	0.662201	0.315497	0.062093	Factor_Treatment_CaSki_DMSO_control	CaSki_13-biotin	No	lm
IGF2R	sp|P11717|MPRI_HUMAN	0.637472	0.307868	0.0565572	Factor_Treatment_CaSki_DMSO_control	CaSki_13-biotin	No	lm
HSP90AB1	sp|P08238|HS90B_HUMAN	-0.625187	0.298177	0.0549209	Factor_Treatment_CaSki_DMSO_control	CaSki_13-biotin	No	lmer
KRAS	sp|P01116|RASK_HUMAN	1.68786	0.297959	0.0549209	Factor_Treatment_CaSki_DMSO_control	CaSki_13-biotin	No	lm
ELAVL1	sp|Q15717|ELAV1_HUMAN	2.95724	0.300348	0.0549209	Factor_Treatment_CaSki_DMSO_control	CaSki_13-biotin	No	lm
PFKP	sp|Q01813|PFKAP_HUMAN	0.625387	0.30105	0.0549209	Factor_Treatment_CaSki_DMSO_control	CaSki_13-biotin	No	lm
	tr|F5H423|F5H423_HUMAN	1.0295	0.289865	0.0509052	Factor_Treatment_CaSki_DMSO_control	CaSki_13-biotin	No	lm
PCCA	sp|P05165|PCCA_HUMAN	0.163243	0.290907	0.0509052	Factor_Treatment_CaSki_DMSO_control	CaSki_13-biotin	No	lmer
TRIM28	sp|Q13263|TIF1B_HUMAN	0.749769	0.229888	0.0490099	Factor_Treatment_CaSki_DMSO_control	CaSki_13-biotin	No	lm
RPS3	sp|P23396|RS3_HUMAN	0.437405	0.238655	0.0490099	Factor_Treatment_CaSki_DMSO_control	CaSki_13-biotin	No	lmer
RBM39	sp|Q14498|RBM39_HUMAN	0.290531	0.203597	0.0490099	Factor_Treatment_CaSki_DMSO_control	CaSki_13-biotin	No	lm
VDAC2	sp|P45880|VDAC2_HUMAN	0.657227	0.245949	0.0490099	Factor_Treatment_CaSki_DMSO_control	CaSki_13-biotin	No	lmer
CKAP4	sp|Q07065|CKAP4_HUMAN	1.07101	0.217808	0.0490099	Factor_Treatment_CaSki_DMSO_control	CaSki_13-biotin	No	lm
EXOC4	sp|Q96A65|EXOC4_HUMAN	0.867835	0.242497	0.0490099	Factor_Treatment_CaSki_DMSO_control	CaSki_13-biotin	No	lm
RPA3	sp|P35244|RFA3_HUMAN	-0.919151	0.238022	0.0490099	Factor_Treatment_CaSki_DMSO_control	CaSki_13-biotin	No	lm
RPS16	sp|P62249|RS16_HUMAN	0.177446	0.255884	0.0490099	Factor_Treatment_CaSki_DMSO_control	CaSki_13-biotin	No	lm
FKBP8	sp|Q14318|FKBP8_HUMAN	-1.68582	0.2031	0.0490099	Factor_Treatment_CaSki_DMSO_control	CaSki_13-biotin	No	lm
S100A6	sp|P06703|S10A6_HUMAN	1.9901	0.25119	0.0490099	Factor_Treatment_CaSki_DMSO_control	CaSki_13-biotin	No	lm
YWHAQ	sp|P27348|1433T_HUMAN	-2.99269	0.251058	0.0490099	Factor_Treatment_CaSki_DMSO_control	CaSki_13-biotin	No	lm
H3-3B	tr|K7ES00|K7ES00_HUMAN	0.451792	0.269943	0.0490099	Factor_Treatment_CaSki_DMSO_control	CaSki_13-biotin	No	lm
GOLGB1	sp|Q14789|GOGB1_HUMAN	0.855787	0.235447	0.0490099	Factor_Treatment_CaSki_DMSO_control	CaSki_13-biotin	No	lm
ATP1A3	tr|A0A0A0MT26|A0A0A0MT26_HUMAN	0.338538	0.20605	0.0490099	Factor_Treatment_CaSki_DMSO_control	CaSki_13-biotin	No	lm
RPL7A	sp|P62424|RL7A_HUMAN	1.99975	0.220183	0.0490099	Factor_Treatment_CaSki_DMSO_control	CaSki_13-biotin	No	lm
AHSA1	sp|O95433|AHSA1_HUMAN	0.650923	0.266837	0.0490099	Factor_Treatment_CaSki_DMSO_control	CaSki_13-biotin	No	lm
FLNA	sp|P21333|FLNA_HUMAN	0.438125	0.20693	0.0490099	Factor_Treatment_CaSki_DMSO_control	CaSki_13-biotin	No	lmer
RPL11	sp|P62913|RL11_HUMAN	0.907339	0.214015	0.0490099	Factor_Treatment_CaSki_DMSO_control	CaSki_13-biotin	No	lm
PSMC1	sp|P62191|PRS4_HUMAN	0.804619	0.216775	0.0490099	Factor_Treatment_CaSki_DMSO_control	CaSki_13-biotin	No	lm
IPO4	sp|Q8TEX9|IPO4_HUMAN	0.669768	0.222935	0.0490099	Factor_Treatment_CaSki_DMSO_control	CaSki_13-biotin	No	lm
DLAT	sp|P10515|ODP2_HUMAN	1.38434	0.275693	0.0490099	Factor_Treatment_CaSki_DMSO_control	CaSki_13-biotin	No	lm
RPL13	sp|P26373|RL13_HUMAN	0.721651	0.223623	0.0490099	Factor_Treatment_CaSki_DMSO_control	CaSki_13-biotin	No	lm
RUVBL1	sp|Q9Y265|RUVB1_HUMAN	2.22593	0.278602	0.0490099	Factor_Treatment_CaSki_DMSO_control	CaSki_13-biotin	No	lm
RPS11	sp|P62280|RS11_HUMAN	0.440339	0.226753	0.0490099	Factor_Treatment_CaSki_DMSO_control	CaSki_13-biotin	No	lmer
PSMD2	sp|Q13200|PSMD2_HUMAN	0.783427	0.21554	0.0490099	Factor_Treatment_CaSki_DMSO_control	CaSki_13-biotin	No	lm
PABPC1	sp|P11940|PABP1_HUMAN	0.922566	0.209008	0.0490099	Factor_Treatment_CaSki_DMSO_control	CaSki_13-biotin	No	lm
MCCC2	sp|Q9HCC0|MCCB_HUMAN	0.188666	0.259835	0.0490099	Factor_Treatment_CaSki_DMSO_control	CaSki_13-biotin	No	lmer
LOXL2	sp|Q9Y4K0|LOXL2_HUMAN	0.6608	0.215855	0.0490099	Factor_Treatment_CaSki_DMSO_control	CaSki_13-biotin	No	lm
IPO7	sp|O95373|IPO7_HUMAN	0.610563	0.223007	0.0490099	Factor_Treatment_CaSki_DMSO_control	CaSki_13-biotin	No	lmer
CANX	sp|P27824|CALX_HUMAN	0.254551	0.267045	0.0490099	Factor_Treatment_CaSki_DMSO_control	CaSki_13-biotin	No	lm
FLNB	sp|O75369|FLNB_HUMAN	0.403701	0.277402	0.0490099	Factor_Treatment_CaSki_DMSO_control	CaSki_13-biotin	No	lmer
SEC63	sp|Q9UGP8|SEC63_HUMAN	0.271561	0.243686	0.0490099	Factor_Treatment_CaSki_DMSO_control	CaSki_13-biotin	No	lmer
SEC61B	sp|P60468|SC61B_HUMAN	0.937745	0.239144	0.0490099	Factor_Treatment_CaSki_DMSO_control	CaSki_13-biotin	No	lm
RPS3A	sp|P61247|RS3A_HUMAN	0.8591	0.209596	0.0490099	Factor_Treatment_CaSki_DMSO_control	CaSki_13-biotin	No	lm
RPL36A	tr|J3KQN4|J3KQN4_HUMAN	0.38212	0.217923	0.0490099	Factor_Treatment_CaSki_DMSO_control	CaSki_13-biotin	No	lm
HSP90AA1	sp|P07900|HS90A_HUMAN	-0.421136	0.222072	0.0490099	Factor_Treatment_CaSki_DMSO_control	CaSki_13-biotin	No	lmer
LARP1	sp|Q6PKG0|LARP1_HUMAN	2.26521	0.274192	0.0490099	Factor_Treatment_CaSki_DMSO_control	CaSki_13-biotin	No	lm
BSG	sp|P35613|BASI_HUMAN	0.821188	0.256414	0.0490099	Factor_Treatment_CaSki_DMSO_control	CaSki_13-biotin	No	lm
RPS6	sp|P62753|RS6_HUMAN	0.429917	0.201743	0.0490099	Factor_Treatment_CaSki_DMSO_control	CaSki_13-biotin	No	lm
SSR1	tr|C9IZQ1|C9IZQ1_HUMAN	1.2657	0.273199	0.0490099	Factor_Treatment_CaSki_DMSO_control	CaSki_13-biotin	No	lm
HSP90B1	sp|P14625|ENPL_HUMAN	-0.679716	0.256374	0.0490099	Factor_Treatment_CaSki_DMSO_control	CaSki_13-biotin	No	lm
EFEMP1	sp|Q12805|FBLN3_HUMAN	2.15198	0.231707	0.0490099	Factor_Treatment_CaSki_DMSO_control	CaSki_13-biotin	No	lm
CALM2	tr|E7EMB3|E7EMB3_HUMAN	0.902841	0.281867	0.0490099	Factor_Treatment_CaSki_DMSO_control	CaSki_13-biotin	No	lm
TXNL1	sp|O43396|TXNL1_HUMAN	1.12931	0.280054	0.0490099	Factor_Treatment_CaSki_DMSO_control	CaSki_13-biotin	No	lm
TFRC	sp|P02786|TFR1_HUMAN	-0.437633	0.236722	0.0490099	Factor_Treatment_CaSki_DMSO_control	CaSki_13-biotin	No	lm
CNP	sp|P09543|CN37_HUMAN	0.67105	0.205744	0.0490099	Factor_Treatment_CaSki_DMSO_control	CaSki_13-biotin	No	lm
RPL24	sp|P83731|RL24_HUMAN	0.549572	0.224058	0.0490099	Factor_Treatment_CaSki_DMSO_control	CaSki_13-biotin	No	lm
RPL23A	tr|A8MUS3|A8MUS3_HUMAN	0.885076	0.198385	0.0489671	Factor_Treatment_CaSki_DMSO_control	CaSki_13-biotin	No	lm
RPL22	sp|P35268|RL22_HUMAN	-2.13251	0.198917	0.0489671	Factor_Treatment_CaSki_DMSO_control	CaSki_13-biotin	No	lm
RPL14	sp|P50914|RL14_HUMAN	1.89113	0.194471	0.0488373	Factor_Treatment_CaSki_DMSO_control	CaSki_13-biotin	No	lm
CIP2A	tr|A0A087X211|A0A087X211_HUMAN	0.751815	0.19333	0.0488373	Factor_Treatment_CaSki_DMSO_control	CaSki_13-biotin	No	lm
QSOX2	sp|Q6ZRP7|QSOX2_HUMAN	1.67851	0.194419	0.0488373	Factor_Treatment_CaSki_DMSO_control	CaSki_13-biotin	No	lm
ACTA2	sp|P62736|ACTA_HUMAN	0.158496	0.189422	0.0465591	Factor_Treatment_CaSki_DMSO_control	CaSki_13-biotin	No	lmer
ACLY	sp|P53396|ACLY_HUMAN	0.166443	0.182818	0.042443	Factor_Treatment_CaSki_DMSO_control	CaSki_13-biotin	No	lm
PCNA	sp|P12004|PCNA_HUMAN	0.328174	0.182065	0.042443	Factor_Treatment_CaSki_DMSO_control	CaSki_13-biotin	No	lm
RPL4	sp|P36578|RL4_HUMAN	0.69775	0.180128	0.0421174	Factor_Treatment_CaSki_DMSO_control	CaSki_13-biotin	No	lm
OGDH	tr|E9PCR7|E9PCR7_HUMAN	0.37911	0.176876	0.0419279	Factor_Treatment_CaSki_DMSO_control	CaSki_13-biotin	No	lm
RPS23	sp|P62266|RS23_HUMAN	0.299812	0.175842	0.0419279	Factor_Treatment_CaSki_DMSO_control	CaSki_13-biotin	No	lm
GNAI2	sp|P04899|GNAI2_HUMAN	-1.42433	0.175139	0.0419279	Factor_Treatment_CaSki_DMSO_control	CaSki_13-biotin	No	lm
PRMT1	sp|Q99873|ANM1_HUMAN	0.618313	0.171538	0.0412522	Factor_Treatment_CaSki_DMSO_control	CaSki_13-biotin	No	lm
GNB2	sp|P62879|GBB2_HUMAN	0.899387	0.171293	0.0412522	Factor_Treatment_CaSki_DMSO_control	CaSki_13-biotin	No	lm
MCCC1	sp|Q96RQ3|MCCA_HUMAN	0.135231	0.165425	0.040096	Factor_Treatment_CaSki_DMSO_control	CaSki_13-biotin	No	lmer
ITPRIP	sp|Q8IWB1|IPRI_HUMAN	-0.2891	0.168283	0.040096	Factor_Treatment_CaSki_DMSO_control	CaSki_13-biotin	No	lm
RPLP0	sp|P05388|RLA0_HUMAN	0.536521	0.166057	0.040096	Factor_Treatment_CaSki_DMSO_control	CaSki_13-biotin	No	lmer
SUB1	sp|P53999|TCP4_HUMAN	0.461761	0.150282	0.038766	Factor_Treatment_CaSki_DMSO_control	CaSki_13-biotin	No	lm
SSBP1	sp|Q04837|SSBP_HUMAN	0.340514	0.158423	0.038766	Factor_Treatment_CaSki_DMSO_control	CaSki_13-biotin	No	lm
RUVBL2	sp|Q9Y230|RUVB2_HUMAN	0.768218	0.159561	0.038766	Factor_Treatment_CaSki_DMSO_control	CaSki_13-biotin	No	lm
RPS14	sp|P62263|RS14_HUMAN	0.64992	0.153339	0.038766	Factor_Treatment_CaSki_DMSO_control	CaSki_13-biotin	No	lm
NPM1	sp|P06748|NPM_HUMAN	0.515871	0.154869	0.038766	Factor_Treatment_CaSki_DMSO_control	CaSki_13-biotin	No	lm
	tr|A0A0U1RRH7|A0A0U1RRH7_HUMAN	-1.10685	0.149227	0.038766	Factor_Treatment_CaSki_DMSO_control	CaSki_13-biotin	No	lm
RPS2	sp|P15880|RS2_HUMAN	0.549773	0.148215	0.038766	Factor_Treatment_CaSki_DMSO_control	CaSki_13-biotin	No	lm
UBC	sp|P0CG48|UBC_HUMAN	1.30286	0.147199	0.038766	Factor_Treatment_CaSki_DMSO_control	CaSki_13-biotin	No	lm
SUN2	sp|Q9UH99|SUN2_HUMAN	0.387755	0.147175	0.038766	Factor_Treatment_CaSki_DMSO_control	CaSki_13-biotin	No	lm
RPS13	sp|P62277|RS13_HUMAN	-0.769895	0.153542	0.038766	Factor_Treatment_CaSki_DMSO_control	CaSki_13-biotin	No	lm
MYH9	sp|P35579|MYH9_HUMAN	0.136246	0.145742	0.038766	Factor_Treatment_CaSki_DMSO_control	CaSki_13-biotin	No	lmer
CLTC	tr|A0A087WVQ6|A0A087WVQ6_HUMAN	0.601554	0.159077	0.038766	Factor_Treatment_CaSki_DMSO_control	CaSki_13-biotin	No	lmer
CLTB	sp|P09497|CLCB_HUMAN	0.616046	0.137335	0.0348283	Factor_Treatment_CaSki_DMSO_control	CaSki_13-biotin	No	lmer
VIM	sp|P08670|VIME_HUMAN	0.388407	0.137898	0.0348283	Factor_Treatment_CaSki_DMSO_control	CaSki_13-biotin	No	lmer
IPO11	sp|Q9UI26|IPO11_HUMAN	0.267802	0.137665	0.0348283	Factor_Treatment_CaSki_DMSO_control	CaSki_13-biotin	No	lm
RPS9	sp|P46781|RS9_HUMAN	0.243299	0.126687	0.0277367	Factor_Treatment_CaSki_DMSO_control	CaSki_13-biotin	No	lmer
ANXA2	sp|P07355|ANXA2_HUMAN	0.428905	0.125819	0.0277367	Factor_Treatment_CaSki_DMSO_control	CaSki_13-biotin	No	lmer
RPL38	sp|P63173|RL38_HUMAN	0.455434	0.126711	0.0277367	Factor_Treatment_CaSki_DMSO_control	CaSki_13-biotin	No	lm
RPL31	sp|P62899|RL31_HUMAN	0.444431	0.122399	0.0267141	Factor_Treatment_CaSki_DMSO_control	CaSki_13-biotin	No	lm
PKP3	sp|Q9Y446|PKP3_HUMAN	0.515756	0.120417	0.0267141	Factor_Treatment_CaSki_DMSO_control	CaSki_13-biotin	No	lm
TUBA3D	sp|P0DPH8|TBA3D_HUMAN	0.447456	0.121806	0.0267141	Factor_Treatment_CaSki_DMSO_control	CaSki_13-biotin	No	lm
COPA	sp|P53621|COPA_HUMAN	-0.481844	0.116679	0.0244266	Factor_Treatment_CaSki_DMSO_control	CaSki_13-biotin	No	lm
LUC7L2	tr|A0A0A6YYJ8|A0A0A6YYJ8_HUMAN	0.236478	0.113447	0.02264	Factor_Treatment_CaSki_DMSO_control	CaSki_13-biotin	No	lm
PKP2	sp|Q99959|PKP2_HUMAN	-0.685228	0.11197	0.0226026	Factor_Treatment_CaSki_DMSO_control	CaSki_13-biotin	No	lm
PKM	sp|P14618|KPYM_HUMAN	-0.387151	0.105253	0.0173221	Factor_Treatment_CaSki_DMSO_control	CaSki_13-biotin	No	lm
HNRNPK	sp|P61978|HNRPK_HUMAN	0.274557	0.103198	0.0166975	Factor_Treatment_CaSki_DMSO_control	CaSki_13-biotin	No	lmer
SEPTIN9	sp|Q9UHD8|SEPT9_HUMAN	0.343542	0.0996139	0.0161518	Factor_Treatment_CaSki_DMSO_control	CaSki_13-biotin	No	lm
MYL6	tr|B7Z6Z4|B7Z6Z4_HUMAN	-0.149482	0.100784	0.0161518	Factor_Treatment_CaSki_DMSO_control	CaSki_13-biotin	No	lm
IPO5	tr|H0Y8C6|H0Y8C6_HUMAN	0.893634	0.0983874	0.0161518	Factor_Treatment_CaSki_DMSO_control	CaSki_13-biotin	No	lm
LMNA	sp|P02545|LMNA_HUMAN	0.266029	0.0956354	0.0148122	Factor_Treatment_CaSki_DMSO_control	CaSki_13-biotin	No	lmer
EIF2S1	sp|P05198|IF2A_HUMAN	-1.23798	0.090061	0.0143096	Factor_Treatment_CaSki_DMSO_control	CaSki_13-biotin	No	lm
SPTLC1	sp|O15269|SPTC1_HUMAN	-0.0713119	0.0900413	0.0143096	Factor_Treatment_CaSki_DMSO_control	CaSki_13-biotin	No	lm
H4C1	sp|P62805|H4_HUMAN	0.584163	0.0890761	0.0143096	Factor_Treatment_CaSki_DMSO_control	CaSki_13-biotin	No	lm
FXR1	sp|P51114|FXR1_HUMAN	0.941407	0.0926264	0.0143096	Factor_Treatment_CaSki_DMSO_control	CaSki_13-biotin	No	lm
YWHAZ	sp|P63104|1433Z_HUMAN	-0.523275	0.0881392	0.0143096	Factor_Treatment_CaSki_DMSO_control	CaSki_13-biotin	No	lm
RPL7	sp|P18124|RL7_HUMAN	0.428551	0.0841796	0.0135776	Factor_Treatment_CaSki_DMSO_control	CaSki_13-biotin	No	lm
PPFIBP1	sp|Q86W92|LIPB1_HUMAN	-0.295945	0.0832645	0.0135776	Factor_Treatment_CaSki_DMSO_control	CaSki_13-biotin	No	lm
RPL10A	sp|P62906|RL10A_HUMAN	0.547939	0.0851464	0.0135776	Factor_Treatment_CaSki_DMSO_control	CaSki_13-biotin	No	lm
SELENOK	sp|Q9Y6D0|SELK_HUMAN	0.792071	0.0743995	0.0122218	Factor_Treatment_CaSki_DMSO_control	CaSki_13-biotin	No	lm
ACTG1	sp|P63261|ACTG_HUMAN	-0.0516846	0.0693544	0.0122218	Factor_Treatment_CaSki_DMSO_control	CaSki_13-biotin	No	lmer
CORO1C	sp|Q9ULV4|COR1C_HUMAN	-0.10663	0.0707656	0.0122218	Factor_Treatment_CaSki_DMSO_control	CaSki_13-biotin	No	lm
RPL13A	tr|M0QYS1|M0QYS1_HUMAN	-0.10478	0.070294	0.0122218	Factor_Treatment_CaSki_DMSO_control	CaSki_13-biotin	No	lm
PPP2R1B	sp|P30154|2AAB_HUMAN	0.690889	0.0657219	0.0122218	Factor_Treatment_CaSki_DMSO_control	CaSki_13-biotin	No	lm
RPL3	sp|P39023|RL3_HUMAN	0.378394	0.066579	0.0122218	Factor_Treatment_CaSki_DMSO_control	CaSki_13-biotin	No	lm
MYH10	sp|P35580|MYH10_HUMAN	0.0794061	0.0685353	0.0122218	Factor_Treatment_CaSki_DMSO_control	CaSki_13-biotin	No	lmer
RPS5	sp|P46782|RS5_HUMAN	0.332674	0.0672021	0.0122218	Factor_Treatment_CaSki_DMSO_control	CaSki_13-biotin	No	lm
TMOD3	sp|Q9NYL9|TMOD3_HUMAN	0.38777	0.0758737	0.0122218	Factor_Treatment_CaSki_DMSO_control	CaSki_13-biotin	No	lm
NCL	sp|P19338|NUCL_HUMAN	0.387048	0.0669843	0.0122218	Factor_Treatment_CaSki_DMSO_control	CaSki_13-biotin	No	lm
PCBP2	sp|Q15366|PCBP2_HUMAN	0.15226	0.0708723	0.0122218	Factor_Treatment_CaSki_DMSO_control	CaSki_13-biotin	No	lm
PPM1G	sp|O15355|PPM1G_HUMAN	-0.19477	0.072319	0.0122218	Factor_Treatment_CaSki_DMSO_control	CaSki_13-biotin	No	lm
RPL27A	sp|P46776|RL27A_HUMAN	-0.145137	0.0546665	0.00942531	Factor_Treatment_CaSki_DMSO_control	CaSki_13-biotin	No	lm
RPLP1	sp|P05386|RLA1_HUMAN	0.616167	0.0559334	0.00942531	Factor_Treatment_CaSki_DMSO_control	CaSki_13-biotin	No	lm
RAE1	tr|E9PQ57|E9PQ57_HUMAN	0.133222	0.0610222	0.00942531	Factor_Treatment_CaSki_DMSO_control	CaSki_13-biotin	No	lm
RPA1	sp|P27694|RFA1_HUMAN	0.253333	0.0538296	0.00942531	Factor_Treatment_CaSki_DMSO_control	CaSki_13-biotin	No	lmer
BOLA2-SMG1P6	tr|H3BVE0|H3BVE0_HUMAN	0.307777	0.0554204	0.00942531	Factor_Treatment_CaSki_DMSO_control	CaSki_13-biotin	No	lm
MYEF2	tr|A0A0A0MR39|A0A0A0MR39_HUMAN	0.0402465	0.0537544	0.00942531	Factor_Treatment_CaSki_DMSO_control	CaSki_13-biotin	No	lm
MYO1B	sp|O43795|MYO1B_HUMAN	-0.222856	0.0541405	0.00942531	Factor_Treatment_CaSki_DMSO_control	CaSki_13-biotin	No	lmer
MPRIP	tr|A0A494BZV2|A0A494BZV2_HUMAN	-0.103803	0.0267346	0.00791998	Factor_Treatment_CaSki_DMSO_control	CaSki_13-biotin	No	lmer
RPL30	sp|P62888|RL30_HUMAN	0.212281	0.0363201	0.00791998	Factor_Treatment_CaSki_DMSO_control	CaSki_13-biotin	No	lm
RPS8	sp|P62241|RS8_HUMAN	-0.145169	0.0379424	0.00791998	Factor_Treatment_CaSki_DMSO_control	CaSki_13-biotin	No	lm
RTN4	sp|Q9NQC3|RTN4_HUMAN	0.100789	0.0245173	0.00791998	Factor_Treatment_CaSki_DMSO_control	CaSki_13-biotin	No	lm
CD59	sp|P13987|CD59_HUMAN	0.235213	0.0391144	0.00791998	Factor_Treatment_CaSki_DMSO_control	CaSki_13-biotin	No	lm
RPS18	sp|P62269|RS18_HUMAN	0.203628	0.0489554	0.00791998	Factor_Treatment_CaSki_DMSO_control	CaSki_13-biotin	No	lm
RAI14	sp|Q9P0K7|RAI14_HUMAN	-0.204406	0.0494747	0.00791998	Factor_Treatment_CaSki_DMSO_control	CaSki_13-biotin	No	lmer
DSTN	sp|P60981|DEST_HUMAN	0.0981189	0.0221994	0.00791998	Factor_Treatment_CaSki_DMSO_control	CaSki_13-biotin	No	lm
H2AX	sp|P16104|H2AX_HUMAN	-0.252921	0.023333	0.00791998	Factor_Treatment_CaSki_DMSO_control	CaSki_13-biotin	No	lm
HK2	sp|P52789|HXK2_HUMAN	0.118184	0.0307091	0.00791998	Factor_Treatment_CaSki_DMSO_control	CaSki_13-biotin	No	lm
TIMM13	sp|Q9Y5L4|TIM13_HUMAN	-0.28973	0.0232109	0.00791998	Factor_Treatment_CaSki_DMSO_control	CaSki_13-biotin	No	lm
RBM14	sp|Q96PK6|RBM14_HUMAN	-0.222976	0.0237065	0.00791998	Factor_Treatment_CaSki_DMSO_control	CaSki_13-biotin	No	lm
CFL1	tr|E9PK25|E9PK25_HUMAN	-0.133747	0.0305804	0.00791998	Factor_Treatment_CaSki_DMSO_control	CaSki_13-biotin	No	lm
PSMD11	sp|O00231|PSD11_HUMAN	-0.156209	0.0359233	0.00791998	Factor_Treatment_CaSki_DMSO_control	CaSki_13-biotin	No	lm
CAV1	sp|Q03135|CAV1_HUMAN	0.349909	0.0391958	0.00791998	Factor_Treatment_CaSki_DMSO_control	CaSki_13-biotin	No	lm
RHEB	sp|Q15382|RHEB_HUMAN	0.141049	0.0330236	0.00791998	Factor_Treatment_CaSki_DMSO_control	CaSki_13-biotin	No	lm
RPS7	sp|P62081|RS7_HUMAN	0.12839	0.0268456	0.00791998	Factor_Treatment_CaSki_DMSO_control	CaSki_13-biotin	No	lm
FAU	tr|E9PR30|E9PR30_HUMAN	-0.0420701	0.02504	0.00791998	Factor_Treatment_CaSki_DMSO_control	CaSki_13-biotin	No	lm
RPL18A	sp|Q02543|RL18A_HUMAN	0.176516	0.0415445	0.00791998	Factor_Treatment_CaSki_DMSO_control	CaSki_13-biotin	No	lm
BANF1	sp|O75531|BAF_HUMAN	-0.271844	0.0337943	0.00791998	Factor_Treatment_CaSki_DMSO_control	CaSki_13-biotin	No	lm
RPL37	sp|P61927|RL37_HUMAN	0.0431765	0.0284118	0.00791998	Factor_Treatment_CaSki_DMSO_control	CaSki_13-biotin	No	lm
MAP1B	sp|P46821|MAP1B_HUMAN	0.125664	0.0328897	0.00791998	Factor_Treatment_CaSki_DMSO_control	CaSki_13-biotin	No	lm
PLEC	sp|Q15149|PLEC_HUMAN	-0.122504	0.0420651	0.00791998	Factor_Treatment_CaSki_DMSO_control	CaSki_13-biotin	No	lmer
RPA2	sp|P15927|RFA2_HUMAN	0.139399	0.0274447	0.00791998	Factor_Treatment_CaSki_DMSO_control	CaSki_13-biotin	No	lm
PAWR	sp|Q96IZ0|PAWR_HUMAN	0.300798	0.0201899	0.00755437	Factor_Treatment_CaSki_DMSO_control	CaSki_13-biotin	No	lm
ELOVL1	sp|Q9BW60|ELOV1_HUMAN	0.0179919	0.0194211	0.00755437	Factor_Treatment_CaSki_DMSO_control	CaSki_13-biotin	No	lm
COL17A1	sp|Q9UMD9|COHA1_HUMAN	0.116281	0.0169586	0.00629329	Factor_Treatment_CaSki_DMSO_control	CaSki_13-biotin	No	lm
CAVIN1	sp|Q6NZI2|CAVN1_HUMAN	0.0307805	0.0110564	0.00397533	Factor_Treatment_CaSki_DMSO_control	CaSki_13-biotin	No	lm
CAPZA1	sp|P52907|CAZA1_HUMAN	0.0503754	0.0114589	0.00397533	Factor_Treatment_CaSki_DMSO_control	CaSki_13-biotin	No	lm
MYL12A	tr|J3QRS3|J3QRS3_HUMAN	-0.020809	0.0129751	0.00397533	Factor_Treatment_CaSki_DMSO_control	CaSki_13-biotin	No	lm
SEC16A	sp|O15027|SC16A_HUMAN	-0.0384874	0.00751464	0.00212259	Factor_Treatment_CaSki_DMSO_control	CaSki_13-biotin	No	lm
RPL17-C18orf32	tr|A0A0A6YYL6|A0A0A6YYL6_HUMAN	0.0178577	0.0048621	0.00212259	Factor_Treatment_CaSki_DMSO_control	CaSki_13-biotin	No	lm
MYO1C	sp|O00159|MYO1C_HUMAN	0.00901326	0.00262836	0.00212259	Factor_Treatment_CaSki_DMSO_control	CaSki_13-biotin	No	lmer
LSM14A	sp|Q8ND56|LS14A_HUMAN	-0.0120583	0.00555527	0.00212259	Factor_Treatment_CaSki_DMSO_control	CaSki_13-biotin	No	lm
GSN	sp|P06396|GELS_HUMAN	0.0131866	0.00389402	0.00212259	Factor_Treatment_CaSki_DMSO_control	CaSki_13-biotin	No	lm
YWHAE	sp|P62258|1433E_HUMAN	0.0208602	0.00212259	0.00212259	Factor_Treatment_CaSki_DMSO_control	CaSki_13-biotin	No	lm

## Sheet: CaSki DMSO vs. 13-3L3A-bio
Gene	Protein	Est_Fc	Pval	Qval	Reference_condition	Comparision_condition	Is_outlier	modelFit
RPN1	sp|P04843|RPN1_HUMAN	4.66515	300	297.431	Factor_Treatment_CaSki_DMSO_control	CaSki_13-3L3A-biotin	No	lmer
SEC63	sp|Q9UGP8|SEC63_HUMAN	4.85255	27.5043	25.2359	Factor_Treatment_CaSki_DMSO_control	CaSki_13-3L3A-biotin	No	lmer
TUBB2A	sp|Q13885|TBB2A_HUMAN	3.95316	26.949	24.8567	Factor_Treatment_CaSki_DMSO_control	CaSki_13-3L3A-biotin	No	lmer
PRKDC	sp|P78527|PRKDC_HUMAN	4.93368	25.0366	23.0693	Factor_Treatment_CaSki_DMSO_control	CaSki_13-3L3A-biotin	No	lmer
SLC7A5	sp|Q01650|LAT1_HUMAN	4.02632	22.8806	21.0102	Factor_Treatment_CaSki_DMSO_control	CaSki_13-3L3A-biotin	No	lmer
TUBA1C	tr|F5H5D3|F5H5D3_HUMAN	4.13295	21.7343	19.9431	Factor_Treatment_CaSki_DMSO_control	CaSki_13-3L3A-biotin	No	lmer
TUBB6	sp|Q9BUF5|TBB6_HUMAN	3.9081	21.4599	19.7357	Factor_Treatment_CaSki_DMSO_control	CaSki_13-3L3A-biotin	No	lmer
ATP2A2	sp|P16615|AT2A2_HUMAN	5.08356	20.2684	18.6021	Factor_Treatment_CaSki_DMSO_control	CaSki_13-3L3A-biotin	No	lmer
SLC3A2	tr|J3KPF3|J3KPF3_HUMAN	3.57933	17.9623	16.3472	Factor_Treatment_CaSki_DMSO_control	CaSki_13-3L3A-biotin	No	lmer
P4HB	sp|P07237|PDIA1_HUMAN	4.70469	16.7949	15.2256	Factor_Treatment_CaSki_DMSO_control	CaSki_13-3L3A-biotin	No	lmer
TRIP13	sp|Q15645|PCH2_HUMAN	3.98143	14.665	13.137	Factor_Treatment_CaSki_DMSO_control	CaSki_13-3L3A-biotin	No	lmer
HSPB1	sp|P04792|HSPB1_HUMAN	2.9861	13.8969	12.4067	Factor_Treatment_CaSki_DMSO_control	CaSki_13-3L3A-biotin	No	lmer
UGGT1	sp|Q9NYU2|UGGG1_HUMAN	4.32742	13.2171	11.7616	Factor_Treatment_CaSki_DMSO_control	CaSki_13-3L3A-biotin	No	lmer
HSPA1B	tr|A0A0G2JIW1|A0A0G2JIW1_HUMAN	3.4963	13.1425	11.7193	Factor_Treatment_CaSki_DMSO_control	CaSki_13-3L3A-biotin	No	lmer
DLST	sp|P36957|ODO2_HUMAN	3.48773	11.6708	10.2775	Factor_Treatment_CaSki_DMSO_control	CaSki_13-3L3A-biotin	No	lmer
SLC16A3	sp|O15427|MOT4_HUMAN	3.66714	11.3111	9.96145	Factor_Treatment_CaSki_DMSO_control	CaSki_13-3L3A-biotin	No	lm
CAD	sp|P27708|PYR1_HUMAN	4.06017	11.3004	9.96145	Factor_Treatment_CaSki_DMSO_control	CaSki_13-3L3A-biotin	No	lmer
EGFR	sp|P00533|EGFR_HUMAN	3.36525	11.0652	9.75113	Factor_Treatment_CaSki_DMSO_control	CaSki_13-3L3A-biotin	No	lm
AIFM1	sp|O95831|AIFM1_HUMAN	3.53438	9.95002	8.6594	Factor_Treatment_CaSki_DMSO_control	CaSki_13-3L3A-biotin	No	lm
GLRX3	sp|O76003|GLRX3_HUMAN	4.87399	9.87304	8.6047	Factor_Treatment_CaSki_DMSO_control	CaSki_13-3L3A-biotin	No	lmer
SLC25A4	sp|P12235|ADT1_HUMAN	3.38343	9.76579	8.51864	Factor_Treatment_CaSki_DMSO_control	CaSki_13-3L3A-biotin	No	lm
HSPA8	sp|P11142|HSP7C_HUMAN	3.3951	9.55939	8.33244	Factor_Treatment_CaSki_DMSO_control	CaSki_13-3L3A-biotin	No	lmer
CALU	sp|O43852|CALU_HUMAN	3.18397	9.22531	8.01767	Factor_Treatment_CaSki_DMSO_control	CaSki_13-3L3A-biotin	No	lmer
ATL3	sp|Q6DD88|ATLA3_HUMAN	4.18898	8.80173	7.61256	Factor_Treatment_CaSki_DMSO_control	CaSki_13-3L3A-biotin	No	lm
SEC13	sp|P55735|SEC13_HUMAN	3.86443	8.61059	7.43915	Factor_Treatment_CaSki_DMSO_control	CaSki_13-3L3A-biotin	No	lm
ACTG1	sp|P63261|ACTG_HUMAN	1.59187	8.06562	6.91122	Factor_Treatment_CaSki_DMSO_control	CaSki_13-3L3A-biotin	No	lmer
CANX	sp|P27824|CALX_HUMAN	2.49716	7.65137	6.51336	Factor_Treatment_CaSki_DMSO_control	CaSki_13-3L3A-biotin	No	lm
PHGDH	sp|O43175|SERA_HUMAN	3.88603	7.5726	6.45205	Factor_Treatment_CaSki_DMSO_control	CaSki_13-3L3A-biotin	No	lmer
XPO1	sp|O14980|XPO1_HUMAN	4.66166	7.55903	6.45205	Factor_Treatment_CaSki_DMSO_control	CaSki_13-3L3A-biotin	No	lmer
TUBA4A	sp|P68366|TBA4A_HUMAN	4.04867	7.47057	6.37832	Factor_Treatment_CaSki_DMSO_control	CaSki_13-3L3A-biotin	No	lm
EEF1A1	sp|P68104|EF1A1_HUMAN	3.14693	7.30221	6.22419	Factor_Treatment_CaSki_DMSO_control	CaSki_13-3L3A-biotin	No	lmer
HSPA5	sp|P11021|BIP_HUMAN	3.63782	7.16103	6.09681	Factor_Treatment_CaSki_DMSO_control	CaSki_13-3L3A-biotin	No	lmer
DYNC1H1	sp|Q14204|DYHC1_HUMAN	3.1277	6.94763	5.89677	Factor_Treatment_CaSki_DMSO_control	CaSki_13-3L3A-biotin	No	lmer
TUBA1A	sp|Q71U36|TBA1A_HUMAN	3.22005	6.9226	5.8847	Factor_Treatment_CaSki_DMSO_control	CaSki_13-3L3A-biotin	No	lm
CORO1C	sp|Q9ULV4|COR1C_HUMAN	2.75975	6.64314	5.63007	Factor_Treatment_CaSki_DMSO_control	CaSki_13-3L3A-biotin	No	lm
TUBB4B	sp|P68371|TBB4B_HUMAN	3.53443	6.64323	5.63007	Factor_Treatment_CaSki_DMSO_control	CaSki_13-3L3A-biotin	No	lmer
KPNB1	sp|Q14974|IMB1_HUMAN	4.23049	6.39414	5.39297	Factor_Treatment_CaSki_DMSO_control	CaSki_13-3L3A-biotin	No	lmer
SLC25A5	sp|P05141|ADT2_HUMAN	3.48318	6.29515	5.30556	Factor_Treatment_CaSki_DMSO_control	CaSki_13-3L3A-biotin	No	lm
BZW1	sp|Q7L1Q6|BZW1_HUMAN	3.7968	6.14999	5.17168	Factor_Treatment_CaSki_DMSO_control	CaSki_13-3L3A-biotin	No	lm
RCN2	sp|Q14257|RCN2_HUMAN	4.48898	5.97226	5.00495	Factor_Treatment_CaSki_DMSO_control	CaSki_13-3L3A-biotin	No	lmer
AHNAK	sp|Q09666|AHNK_HUMAN	3.31762	5.75911	4.80252	Factor_Treatment_CaSki_DMSO_control	CaSki_13-3L3A-biotin	No	lmer
RPL12	sp|P30050|RL12_HUMAN	4.08927	5.63058	4.68445	Factor_Treatment_CaSki_DMSO_control	CaSki_13-3L3A-biotin	No	lm
CSNK1A1	tr|A0A590UJ43|A0A590UJ43_HUMAN	4.39364	5.58002	4.64412	Factor_Treatment_CaSki_DMSO_control	CaSki_13-3L3A-biotin	No	lm
COPB1	sp|P53618|COPB_HUMAN	3.26474	5.52292	4.6018	Factor_Treatment_CaSki_DMSO_control	CaSki_13-3L3A-biotin	No	lm
PCBP2	sp|Q15366|PCBP2_HUMAN	3.42181	5.51796	4.6018	Factor_Treatment_CaSki_DMSO_control	CaSki_13-3L3A-biotin	No	lm
ACTA2	sp|P62736|ACTA_HUMAN	1.56286	5.46986	4.56324	Factor_Treatment_CaSki_DMSO_control	CaSki_13-3L3A-biotin	No	lmer
CALM2	tr|E7EMB3|E7EMB3_HUMAN	6.04717	5.24245	4.34517	Factor_Treatment_CaSki_DMSO_control	CaSki_13-3L3A-biotin	No	lm
TXN	sp|P10599|THIO_HUMAN	4.56966	5.19732	4.30918	Factor_Treatment_CaSki_DMSO_control	CaSki_13-3L3A-biotin	No	lm
TUBB	sp|P07437|TBB5_HUMAN	4.06567	5.1198	4.24939	Factor_Treatment_CaSki_DMSO_control	CaSki_13-3L3A-biotin	No	lmer
SELENOF	sp|O60613|SEP15_HUMAN	3.20929	5.12726	4.24939	Factor_Treatment_CaSki_DMSO_control	CaSki_13-3L3A-biotin	No	lm
VAC14	sp|Q08AM6|VAC14_HUMAN	4.43616	4.98823	4.12642	Factor_Treatment_CaSki_DMSO_control	CaSki_13-3L3A-biotin	No	lm
XPOT	sp|O43592|XPOT_HUMAN	4.94542	4.97556	4.12218	Factor_Treatment_CaSki_DMSO_control	CaSki_13-3L3A-biotin	No	lm
GCN1	sp|Q92616|GCN1_HUMAN	4.07165	4.92377	4.07868	Factor_Treatment_CaSki_DMSO_control	CaSki_13-3L3A-biotin	No	lmer
YBX1	tr|H0Y449|H0Y449_HUMAN	5.4877	4.91026	4.07328	Factor_Treatment_CaSki_DMSO_control	CaSki_13-3L3A-biotin	No	lm
LIMA1	sp|Q9UHB6|LIMA1_HUMAN	1.49905	4.87535	4.04633	Factor_Treatment_CaSki_DMSO_control	CaSki_13-3L3A-biotin	No	lm
HSPD1	sp|P10809|CH60_HUMAN	4.02539	4.85634	4.03516	Factor_Treatment_CaSki_DMSO_control	CaSki_13-3L3A-biotin	No	lmer
ATP5F1A	sp|P25705|ATPA_HUMAN	3.00411	4.78347	3.96997	Factor_Treatment_CaSki_DMSO_control	CaSki_13-3L3A-biotin	No	lmer
CAND1	sp|Q86VP6|CAND1_HUMAN	3.02268	4.75783	3.95188	Factor_Treatment_CaSki_DMSO_control	CaSki_13-3L3A-biotin	No	lmer
CSE1L	sp|P55060|XPO2_HUMAN	4.69796	4.66996	3.87144	Factor_Treatment_CaSki_DMSO_control	CaSki_13-3L3A-biotin	No	lm
ICAM1	sp|P05362|ICAM1_HUMAN	3.19336	4.62233	3.83111	Factor_Treatment_CaSki_DMSO_control	CaSki_13-3L3A-biotin	No	lm
VCP	sp|P55072|TERA_HUMAN	5.431	4.55604	3.77199	Factor_Treatment_CaSki_DMSO_control	CaSki_13-3L3A-biotin	No	lm
TXNRD1	sp|Q16881|TRXR1_HUMAN	3.58445	4.52274	3.74576	Factor_Treatment_CaSki_DMSO_control	CaSki_13-3L3A-biotin	No	lmer
HSD17B12	sp|Q53GQ0|DHB12_HUMAN	3.20948	4.48336	3.71333	Factor_Treatment_CaSki_DMSO_control	CaSki_13-3L3A-biotin	No	lm
LGALS1	sp|P09382|LEG1_HUMAN	7.10282	4.40023	3.63704	Factor_Treatment_CaSki_DMSO_control	CaSki_13-3L3A-biotin	No	lm
RPS6	sp|P62753|RS6_HUMAN	3.34616	4.32831	3.57185	Factor_Treatment_CaSki_DMSO_control	CaSki_13-3L3A-biotin	No	lm
ELOVL1	sp|Q9BW60|ELOV1_HUMAN	2.34121	4.13372	3.38389	Factor_Treatment_CaSki_DMSO_control	CaSki_13-3L3A-biotin	No	lm
RCN1	sp|Q15293|RCN1_HUMAN	3.82124	4.11832	3.37502	Factor_Treatment_CaSki_DMSO_control	CaSki_13-3L3A-biotin	No	lm
NUP93	tr|H3BVG0|H3BVG0_HUMAN	3.35478	4.08993	3.35306	Factor_Treatment_CaSki_DMSO_control	CaSki_13-3L3A-biotin	No	lm
ASPH	sp|Q12797|ASPH_HUMAN	4.90171	4.04998	3.31945	Factor_Treatment_CaSki_DMSO_control	CaSki_13-3L3A-biotin	No	lmer
SPTLC1	sp|O15269|SPTC1_HUMAN	2.02382	3.97082	3.24654	Factor_Treatment_CaSki_DMSO_control	CaSki_13-3L3A-biotin	No	lm
EIF4A1	sp|P60842|IF4A1_HUMAN	4.49935	3.89185	3.17373	Factor_Treatment_CaSki_DMSO_control	CaSki_13-3L3A-biotin	No	lm
SEC61A1	tr|B4DR61|B4DR61_HUMAN	3.6058	3.8417	3.12966	Factor_Treatment_CaSki_DMSO_control	CaSki_13-3L3A-biotin	No	lm
ALG1	sp|Q9BT22|ALG1_HUMAN	5.73133	3.82519	3.11914	Factor_Treatment_CaSki_DMSO_control	CaSki_13-3L3A-biotin	No	lm
GSN	sp|P06396|GELS_HUMAN	3.80877	3.79895	3.0988	Factor_Treatment_CaSki_DMSO_control	CaSki_13-3L3A-biotin	No	lm
IPO11	sp|Q9UI26|IPO11_HUMAN	2.657	3.74635	3.05204	Factor_Treatment_CaSki_DMSO_control	CaSki_13-3L3A-biotin	No	lm
SLC25A3	sp|Q00325|MPCP_HUMAN	3.14456	3.6475	2.95894	Factor_Treatment_CaSki_DMSO_control	CaSki_13-3L3A-biotin	No	lm
CCN1	sp|O00622|CCN1_HUMAN	3.59361	3.5186	2.83572	Factor_Treatment_CaSki_DMSO_control	CaSki_13-3L3A-biotin	No	lm
BAG2	sp|O95816|BAG2_HUMAN	2.44823	3.49749	2.82021	Factor_Treatment_CaSki_DMSO_control	CaSki_13-3L3A-biotin	No	lm
DNAJB11	sp|Q9UBS4|DJB11_HUMAN	2.93726	3.42457	2.75282	Factor_Treatment_CaSki_DMSO_control	CaSki_13-3L3A-biotin	No	lm
CTNNB1	tr|A0A2R8Y5A3|A0A2R8Y5A3_HUMAN	4.18097	3.40856	2.74228	Factor_Treatment_CaSki_DMSO_control	CaSki_13-3L3A-biotin	No	lm
PFKP	sp|Q01813|PFKAP_HUMAN	2.91452	3.37921	2.71832	Factor_Treatment_CaSki_DMSO_control	CaSki_13-3L3A-biotin	No	lm
MSH6	sp|P52701|MSH6_HUMAN	3.58492	3.36181	2.70625	Factor_Treatment_CaSki_DMSO_control	CaSki_13-3L3A-biotin	No	lm
EEF2	sp|P13639|EF2_HUMAN	3.3329	3.34804	2.69774	Factor_Treatment_CaSki_DMSO_control	CaSki_13-3L3A-biotin	No	lmer
PGAM5	sp|Q96HS1|PGAM5_HUMAN	3.5229	3.30368	2.65859	Factor_Treatment_CaSki_DMSO_control	CaSki_13-3L3A-biotin	No	lm
RPS11	sp|P62280|RS11_HUMAN	2.79244	3.2711	2.63114	Factor_Treatment_CaSki_DMSO_control	CaSki_13-3L3A-biotin	No	lmer
RPS3	sp|P23396|RS3_HUMAN	2.87632	3.24635	2.61147	Factor_Treatment_CaSki_DMSO_control	CaSki_13-3L3A-biotin	No	lmer
MBOAT7	sp|Q96N66|MBOA7_HUMAN	3.98414	3.23881	2.60896	Factor_Treatment_CaSki_DMSO_control	CaSki_13-3L3A-biotin	No	lm
MYH10	sp|P35580|MYH10_HUMAN	1.41986	3.21195	2.58706	Factor_Treatment_CaSki_DMSO_control	CaSki_13-3L3A-biotin	No	lmer
MYH9	sp|P35579|MYH9_HUMAN	1.31352	3.20414	2.58416	Factor_Treatment_CaSki_DMSO_control	CaSki_13-3L3A-biotin	No	lmer
STT3A	sp|P46977|STT3A_HUMAN	3.62528	3.16868	2.55355	Factor_Treatment_CaSki_DMSO_control	CaSki_13-3L3A-biotin	No	lm
RPS9	sp|P46781|RS9_HUMAN	2.4545	3.12012	2.50979	Factor_Treatment_CaSki_DMSO_control	CaSki_13-3L3A-biotin	No	lmer
HSPA9	sp|P38646|GRP75_HUMAN	2.56827	3.0925	2.48692	Factor_Treatment_CaSki_DMSO_control	CaSki_13-3L3A-biotin	No	lmer
SCD	sp|O00767|ACOD_HUMAN	3.94991	3.06756	2.4688	Factor_Treatment_CaSki_DMSO_control	CaSki_13-3L3A-biotin	No	lm
LTN1	sp|O94822|LTN1_HUMAN	3.35346	3.06505	2.4688	Factor_Treatment_CaSki_DMSO_control	CaSki_13-3L3A-biotin	No	lm
SSBP1	sp|Q04837|SSBP_HUMAN	2.53385	3.03393	2.44228	Factor_Treatment_CaSki_DMSO_control	CaSki_13-3L3A-biotin	No	lm
SLC16A1	sp|P53985|MOT1_HUMAN	3.28259	2.95965	2.37255	Factor_Treatment_CaSki_DMSO_control	CaSki_13-3L3A-biotin	No	lm
SERPINE1	sp|P05121|PAI1_HUMAN	3.75352	2.9452	2.3626	Factor_Treatment_CaSki_DMSO_control	CaSki_13-3L3A-biotin	No	lm
FAM83H	tr|A0A494C1T9|A0A494C1T9_HUMAN	4.55967	2.89235	2.31421	Factor_Treatment_CaSki_DMSO_control	CaSki_13-3L3A-biotin	No	lmer
TPM1	tr|Q6ZN40|Q6ZN40_HUMAN	2.64429	2.86896	2.29522	Factor_Treatment_CaSki_DMSO_control	CaSki_13-3L3A-biotin	No	lmer
SPTLC2	sp|O15270|SPTC2_HUMAN	5.24632	2.85445	2.28507	Factor_Treatment_CaSki_DMSO_control	CaSki_13-3L3A-biotin	No	lm
TPM3	tr|A0A087WWU8|A0A087WWU8_HUMAN	4.66843	2.82592	2.26087	Factor_Treatment_CaSki_DMSO_control	CaSki_13-3L3A-biotin	No	lm
SLC1A5	sp|Q15758|AAAT_HUMAN	3.83076	2.79794	2.23717	Factor_Treatment_CaSki_DMSO_control	CaSki_13-3L3A-biotin	No	lm
MARCKS	sp|P29966|MARCS_HUMAN	3.84917	2.7923	2.23576	Factor_Treatment_CaSki_DMSO_control	CaSki_13-3L3A-biotin	No	lm
THBS1	sp|P07996|TSP1_HUMAN	3.27479	2.77131	2.21897	Factor_Treatment_CaSki_DMSO_control	CaSki_13-3L3A-biotin	No	lm
TNPO1	sp|Q92973|TNPO1_HUMAN	4.22473	2.75429	2.20611	Factor_Treatment_CaSki_DMSO_control	CaSki_13-3L3A-biotin	No	lmer
SMC2	sp|O95347|SMC2_HUMAN	5.59639	2.73548	2.19141	Factor_Treatment_CaSki_DMSO_control	CaSki_13-3L3A-biotin	No	lm
CDK1	sp|P06493|CDK1_HUMAN	2.64733	2.70802	2.16803	Factor_Treatment_CaSki_DMSO_control	CaSki_13-3L3A-biotin	No	lm
PPP6R3	sp|Q5H9R7|PP6R3_HUMAN	3.827	2.6845	2.14855	Factor_Treatment_CaSki_DMSO_control	CaSki_13-3L3A-biotin	No	lm
RPL23	sp|P62829|RL23_HUMAN	3.20913	2.6761	2.1456	Factor_Treatment_CaSki_DMSO_control	CaSki_13-3L3A-biotin	No	lm
PLEC	sp|Q15149|PLEC_HUMAN	4.21987	2.67358	2.1456	Factor_Treatment_CaSki_DMSO_control	CaSki_13-3L3A-biotin	No	lmer
MAN1B1	sp|Q9UKM7|MA1B1_HUMAN	7.6432	2.63788	2.11383	Factor_Treatment_CaSki_DMSO_control	CaSki_13-3L3A-biotin	No	lm
ARFGEF1	sp|Q9Y6D6|BIG1_HUMAN	5.44131	2.60845	2.08829	Factor_Treatment_CaSki_DMSO_control	CaSki_13-3L3A-biotin	No	lmer
TUBAL3	sp|A6NHL2|TBAL3_HUMAN	3.61267	2.59404	2.07775	Factor_Treatment_CaSki_DMSO_control	CaSki_13-3L3A-biotin	No	lm
NUP214	sp|P35658|NU214_HUMAN	1.46193	2.58744	2.07497	Factor_Treatment_CaSki_DMSO_control	CaSki_13-3L3A-biotin	No	lm
RAN	tr|J3KQE5|J3KQE5_HUMAN	3.34822	2.56936	2.06069	Factor_Treatment_CaSki_DMSO_control	CaSki_13-3L3A-biotin	No	lm
ARF4	sp|P18085|ARF4_HUMAN	3.31351	2.48204	1.97713	Factor_Treatment_CaSki_DMSO_control	CaSki_13-3L3A-biotin	No	lm
PCNA	sp|P12004|PCNA_HUMAN	2.66185	2.4652	1.96402	Factor_Treatment_CaSki_DMSO_control	CaSki_13-3L3A-biotin	No	lm
TECR	tr|M0R2N5|M0R2N5_HUMAN	2.63399	2.44808	1.95059	Factor_Treatment_CaSki_DMSO_control	CaSki_13-3L3A-biotin	No	lm
ARL1	tr|F8VYN9|F8VYN9_HUMAN	4.83068	2.41866	1.92483	Factor_Treatment_CaSki_DMSO_control	CaSki_13-3L3A-biotin	No	lm
FLNB	sp|O75369|FLNB_HUMAN	1.96261	2.41491	1.92472	Factor_Treatment_CaSki_DMSO_control	CaSki_13-3L3A-biotin	No	lmer
HM13	tr|A0A3B3IUB5|A0A3B3IUB5_HUMAN	4.3257	2.40629	1.9197	Factor_Treatment_CaSki_DMSO_control	CaSki_13-3L3A-biotin	No	lm
IQGAP3	sp|Q86VI3|IQGA3_HUMAN	3.26694	2.40048	1.91747	Factor_Treatment_CaSki_DMSO_control	CaSki_13-3L3A-biotin	No	lm
CCT6A	sp|P40227|TCPZ_HUMAN	5.30342	2.38505	1.90558	Factor_Treatment_CaSki_DMSO_control	CaSki_13-3L3A-biotin	No	lm
IPO7	sp|O95373|IPO7_HUMAN	3.37476	2.38069	1.90474	Factor_Treatment_CaSki_DMSO_control	CaSki_13-3L3A-biotin	No	lmer
PRDX4	sp|Q13162|PRDX4_HUMAN	3.37899	2.37304	1.90164	Factor_Treatment_CaSki_DMSO_control	CaSki_13-3L3A-biotin	No	lm
GEMIN4	sp|P57678|GEMI4_HUMAN	3.57959	2.37064	1.90164	Factor_Treatment_CaSki_DMSO_control	CaSki_13-3L3A-biotin	No	lmer
UQCRC2	sp|P22695|QCR2_HUMAN	3.56328	2.35976	1.89759	Factor_Treatment_CaSki_DMSO_control	CaSki_13-3L3A-biotin	No	lm
IGF2BP1	sp|Q9NZI8|IF2B1_HUMAN	2.64031	2.36143	1.89759	Factor_Treatment_CaSki_DMSO_control	CaSki_13-3L3A-biotin	No	lm
ITPRIP	sp|Q8IWB1|IPRI_HUMAN	2.18706	2.35357	1.89479	Factor_Treatment_CaSki_DMSO_control	CaSki_13-3L3A-biotin	No	lm
TOR1AIP2	sp|Q8NFQ8|TOIP2_HUMAN	2.87741	2.34431	1.88888	Factor_Treatment_CaSki_DMSO_control	CaSki_13-3L3A-biotin	No	lm
ITGA3	sp|P26006|ITA3_HUMAN	4.2692	2.33921	1.88711	Factor_Treatment_CaSki_DMSO_control	CaSki_13-3L3A-biotin	No	lm
RPL6	sp|Q02878|RL6_HUMAN	3.57029	2.32987	1.88435	Factor_Treatment_CaSki_DMSO_control	CaSki_13-3L3A-biotin	No	lmer
SUN2	sp|Q9UH99|SUN2_HUMAN	3.45645	2.33147	1.88435	Factor_Treatment_CaSki_DMSO_control	CaSki_13-3L3A-biotin	No	lm
RPS16	sp|P62249|RS16_HUMAN	1.08602	2.31372	1.87145	Factor_Treatment_CaSki_DMSO_control	CaSki_13-3L3A-biotin	No	lm
XIAP	sp|P98170|XIAP_HUMAN	2.37561	2.28637	1.84733	Factor_Treatment_CaSki_DMSO_control	CaSki_13-3L3A-biotin	No	lm
LMNA	sp|P02545|LMNA_HUMAN	3.43106	2.2714	1.83875	Factor_Treatment_CaSki_DMSO_control	CaSki_13-3L3A-biotin	No	lmer
BZW2	sp|Q9Y6E2|BZW2_HUMAN	2.48221	2.27177	1.83875	Factor_Treatment_CaSki_DMSO_control	CaSki_13-3L3A-biotin	No	lm
MYO1C	sp|O00159|MYO1C_HUMAN	3.5598	2.25953	1.83003	Factor_Treatment_CaSki_DMSO_control	CaSki_13-3L3A-biotin	No	lmer
NCAPD2	sp|Q15021|CND1_HUMAN	4.89431	2.25008	1.82373	Factor_Treatment_CaSki_DMSO_control	CaSki_13-3L3A-biotin	No	lm
RPS26P11	sp|Q5JNZ5|RS26L_HUMAN	2.97795	2.24624	1.82299	Factor_Treatment_CaSki_DMSO_control	CaSki_13-3L3A-biotin	No	lm
ECPAS	tr|J3KN16|J3KN16_HUMAN	5.53317	2.21837	1.79822	Factor_Treatment_CaSki_DMSO_control	CaSki_13-3L3A-biotin	No	lm
SERPINH1	sp|P50454|SERPH_HUMAN	3.41777	2.17926	1.76217	Factor_Treatment_CaSki_DMSO_control	CaSki_13-3L3A-biotin	No	lm
TXNL1	sp|O43396|TXNL1_HUMAN	5.33529	2.16336	1.74933	Factor_Treatment_CaSki_DMSO_control	CaSki_13-3L3A-biotin	No	lm
NME1-NME2	tr|Q32Q12|Q32Q12_HUMAN	3.40062	2.14994	1.74193	Factor_Treatment_CaSki_DMSO_control	CaSki_13-3L3A-biotin	No	lm
LOXL2	sp|Q9Y4K0|LOXL2_HUMAN	4.14176	2.15272	1.74193	Factor_Treatment_CaSki_DMSO_control	CaSki_13-3L3A-biotin	No	lm
TIMM50	sp|Q3ZCQ8|TIM50_HUMAN	3.65962	2.14691	1.74189	Factor_Treatment_CaSki_DMSO_control	CaSki_13-3L3A-biotin	No	lm
TFRC	sp|P02786|TFR1_HUMAN	2.17476	2.1397	1.73764	Factor_Treatment_CaSki_DMSO_control	CaSki_13-3L3A-biotin	No	lm
OGDH	tr|E9PCR7|E9PCR7_HUMAN	2.61491	2.13151	1.73239	Factor_Treatment_CaSki_DMSO_control	CaSki_13-3L3A-biotin	No	lm
DHCR24	tr|A0A0A0MTI1|A0A0A0MTI1_HUMAN	1.55877	2.09456	1.69838	Factor_Treatment_CaSki_DMSO_control	CaSki_13-3L3A-biotin	No	lm
HNRNPK	sp|P61978|HNRPK_HUMAN	2.96022	2.07519	1.6819	Factor_Treatment_CaSki_DMSO_control	CaSki_13-3L3A-biotin	No	lmer
RPLP0	sp|P05388|RLA0_HUMAN	3.94754	2.07044	1.68004	Factor_Treatment_CaSki_DMSO_control	CaSki_13-3L3A-biotin	No	lmer
RPL24	sp|P83731|RL24_HUMAN	3.08526	2.06427	1.67674	Factor_Treatment_CaSki_DMSO_control	CaSki_13-3L3A-biotin	No	lm
VDAC2	sp|P45880|VDAC2_HUMAN	3.14042	2.05616	1.67148	Factor_Treatment_CaSki_DMSO_control	CaSki_13-3L3A-biotin	No	lmer
PPP6C	sp|O00743|PPP6_HUMAN	4.29018	2.0412	1.66495	Factor_Treatment_CaSki_DMSO_control	CaSki_13-3L3A-biotin	No	lm
RTRAF	sp|Q9Y224|RTRAF_HUMAN	7.51118	2.04595	1.66495	Factor_Treatment_CaSki_DMSO_control	CaSki_13-3L3A-biotin	No	lm
XPO5	sp|Q9HAV4|XPO5_HUMAN	3.32121	2.0424	1.66495	Factor_Treatment_CaSki_DMSO_control	CaSki_13-3L3A-biotin	No	lm
RICTOR	sp|Q6R327|RICTR_HUMAN	2.62147	2.02806	1.65459	Factor_Treatment_CaSki_DMSO_control	CaSki_13-3L3A-biotin	No	lm
ESYT1	sp|Q9BSJ8|ESYT1_HUMAN	10.6248	2.02055	1.64984	Factor_Treatment_CaSki_DMSO_control	CaSki_13-3L3A-biotin	No	lm
ESRP1	sp|Q6NXG1|ESRP1_HUMAN	4.12541	2.01244	1.64715	Factor_Treatment_CaSki_DMSO_control	CaSki_13-3L3A-biotin	No	lm
RPS23	sp|P62266|RS23_HUMAN	2.05487	2.01241	1.64715	Factor_Treatment_CaSki_DMSO_control	CaSki_13-3L3A-biotin	No	lm
DNAJA1	sp|P31689|DNJA1_HUMAN	1.81643	2.00017	1.63762	Factor_Treatment_CaSki_DMSO_control	CaSki_13-3L3A-biotin	No	lm
ATP1A3	tr|A0A0A0MT26|A0A0A0MT26_HUMAN	2.01847	1.99259	1.63273	Factor_Treatment_CaSki_DMSO_control	CaSki_13-3L3A-biotin	No	lm
MAD2L1	sp|Q13257|MD2L1_HUMAN	3.87927	1.98529	1.62811	Factor_Treatment_CaSki_DMSO_control	CaSki_13-3L3A-biotin	No	lm
MAGED2	sp|Q9UNF1|MAGD2_HUMAN	3.58307	1.98244	1.62791	Factor_Treatment_CaSki_DMSO_control	CaSki_13-3L3A-biotin	No	lm
RPL21	sp|P46778|RL21_HUMAN	3.02371	1.92063	1.57286	Factor_Treatment_CaSki_DMSO_control	CaSki_13-3L3A-biotin	No	lm
PDIA6	sp|Q15084|PDIA6_HUMAN	5.58432	1.92348	1.57286	Factor_Treatment_CaSki_DMSO_control	CaSki_13-3L3A-biotin	No	lm
MYEF2	tr|A0A0A0MR39|A0A0A0MR39_HUMAN	0.832438	1.91952	1.57286	Factor_Treatment_CaSki_DMSO_control	CaSki_13-3L3A-biotin	No	lm
AKAP8L	sp|Q9ULX6|AKP8L_HUMAN	4.21739	1.91625	1.57218	Factor_Treatment_CaSki_DMSO_control	CaSki_13-3L3A-biotin	No	lm
NUP62	sp|P37198|NUP62_HUMAN	1.86231	1.90661	1.56512	Factor_Treatment_CaSki_DMSO_control	CaSki_13-3L3A-biotin	No	lm
CAVIN1	sp|Q6NZI2|CAVN1_HUMAN	2.54655	1.89354	1.55775	Factor_Treatment_CaSki_DMSO_control	CaSki_13-3L3A-biotin	No	lm
AHSA1	sp|O95433|AHSA1_HUMAN	2.92515	1.89104	1.55775	Factor_Treatment_CaSki_DMSO_control	CaSki_13-3L3A-biotin	No	lm
SQOR	sp|Q9Y6N5|SQOR_HUMAN	3.69846	1.89629	1.55775	Factor_Treatment_CaSki_DMSO_control	CaSki_13-3L3A-biotin	No	lm
SEPTIN9	sp|Q9UHD8|SEPT9_HUMAN	3.60354	1.88908	1.55775	Factor_Treatment_CaSki_DMSO_control	CaSki_13-3L3A-biotin	No	lm
CAPZB	tr|B1AK88|B1AK88_HUMAN	2.89985	1.88635	1.55753	Factor_Treatment_CaSki_DMSO_control	CaSki_13-3L3A-biotin	No	lm
PSMC3	sp|P17980|PRS6A_HUMAN	3.15737	1.84939	1.52305	Factor_Treatment_CaSki_DMSO_control	CaSki_13-3L3A-biotin	No	lm
ATP5F1B	sp|P06576|ATPB_HUMAN	3.41585	1.83479	1.51093	Factor_Treatment_CaSki_DMSO_control	CaSki_13-3L3A-biotin	No	lm
PKP3	sp|Q9Y446|PKP3_HUMAN	4.24169	1.83103	1.50963	Factor_Treatment_CaSki_DMSO_control	CaSki_13-3L3A-biotin	No	lm
RPS4X	sp|P62701|RS4X_HUMAN	1.03908	1.81269	1.49476	Factor_Treatment_CaSki_DMSO_control	CaSki_13-3L3A-biotin	No	lm
NPM1	sp|P06748|NPM_HUMAN	3.44665	1.81128	1.49476	Factor_Treatment_CaSki_DMSO_control	CaSki_13-3L3A-biotin	No	lm
TMX3	sp|Q96JJ7|TMX3_HUMAN	4.89118	1.79439	1.48028	Factor_Treatment_CaSki_DMSO_control	CaSki_13-3L3A-biotin	No	lm
TPM1	tr|B7Z596|B7Z596_HUMAN	3.00169	1.78409	1.47239	Factor_Treatment_CaSki_DMSO_control	CaSki_13-3L3A-biotin	No	lm
FLNA	sp|P21333|FLNA_HUMAN	2.47166	1.77287	1.46357	Factor_Treatment_CaSki_DMSO_control	CaSki_13-3L3A-biotin	No	lmer
PSMC1	sp|P62191|PRS4_HUMAN	2.98571	1.76577	1.45884	Factor_Treatment_CaSki_DMSO_control	CaSki_13-3L3A-biotin	No	lm
NUP205	sp|Q92621|NU205_HUMAN	5.17646	1.75646	1.45236	Factor_Treatment_CaSki_DMSO_control	CaSki_13-3L3A-biotin	No	lm
BSG	sp|P35613|BASI_HUMAN	3.55747	1.75456	1.45236	Factor_Treatment_CaSki_DMSO_control	CaSki_13-3L3A-biotin	No	lm
TBC1D9B	sp|Q66K14|TBC9B_HUMAN	7.78416	1.74857	1.44883	Factor_Treatment_CaSki_DMSO_control	CaSki_13-3L3A-biotin	No	lm
MYL12A	tr|J3QRS3|J3QRS3_HUMAN	1.42433	1.74636	1.44883	Factor_Treatment_CaSki_DMSO_control	CaSki_13-3L3A-biotin	No	lm
SELENOO	sp|Q9BVL4|SELO_HUMAN	7.32708	1.73801	1.4428	Factor_Treatment_CaSki_DMSO_control	CaSki_13-3L3A-biotin	No	lm
TMX1	sp|Q9H3N1|TMX1_HUMAN	3.95584	1.73052	1.43761	Factor_Treatment_CaSki_DMSO_control	CaSki_13-3L3A-biotin	No	lm
HSP90AB1	sp|P08238|HS90B_HUMAN	2.13397	1.71161	1.42099	Factor_Treatment_CaSki_DMSO_control	CaSki_13-3L3A-biotin	No	lmer
CAPZA1	sp|P52907|CAZA1_HUMAN	3.48783	1.70427	1.41734	Factor_Treatment_CaSki_DMSO_control	CaSki_13-3L3A-biotin	No	lm
RPS5	sp|P46782|RS5_HUMAN	3.88268	1.69983	1.41734	Factor_Treatment_CaSki_DMSO_control	CaSki_13-3L3A-biotin	No	lm
RPL18A	sp|Q02543|RL18A_HUMAN	3.55359	1.69891	1.41734	Factor_Treatment_CaSki_DMSO_control	CaSki_13-3L3A-biotin	No	lm
CNP	sp|P09543|CN37_HUMAN	3.33632	1.70258	1.41734	Factor_Treatment_CaSki_DMSO_control	CaSki_13-3L3A-biotin	No	lm
DARS1	sp|P14868|SYDC_HUMAN	3.76929	1.68867	1.40934	Factor_Treatment_CaSki_DMSO_control	CaSki_13-3L3A-biotin	No	lm
RPS2	sp|P15880|RS2_HUMAN	3.55839	1.68456	1.40744	Factor_Treatment_CaSki_DMSO_control	CaSki_13-3L3A-biotin	No	lm
VIM	sp|P08670|VIME_HUMAN	2.63396	1.68171	1.4068	Factor_Treatment_CaSki_DMSO_control	CaSki_13-3L3A-biotin	No	lmer
PHB2	sp|Q99623|PHB2_HUMAN	2.57842	1.66984	1.39713	Factor_Treatment_CaSki_DMSO_control	CaSki_13-3L3A-biotin	No	lm
SMN1	sp|Q16637|SMN_HUMAN	4.5823	1.66486	1.39434	Factor_Treatment_CaSki_DMSO_control	CaSki_13-3L3A-biotin	No	lm
NXN	sp|Q6DKJ4|NXN_HUMAN	4.57703	1.65803	1.38969	Factor_Treatment_CaSki_DMSO_control	CaSki_13-3L3A-biotin	No	lm
ERLIN1	sp|O75477|ERLN1_HUMAN	4.95954	1.65144	1.38526	Factor_Treatment_CaSki_DMSO_control	CaSki_13-3L3A-biotin	No	lm
	tr|J3KR12|J3KR12_HUMAN	4.83837	1.62872	1.3647	Factor_Treatment_CaSki_DMSO_control	CaSki_13-3L3A-biotin	No	lm
MYL6	tr|B7Z6Z4|B7Z6Z4_HUMAN	1.33499	1.62415	1.36227	Factor_Treatment_CaSki_DMSO_control	CaSki_13-3L3A-biotin	No	lm
RPL36A	tr|J3KQN4|J3KQN4_HUMAN	1.81189	1.62155	1.3618	Factor_Treatment_CaSki_DMSO_control	CaSki_13-3L3A-biotin	No	lm
CD59	sp|P13987|CD59_HUMAN	4.58184	1.61373	1.36115	Factor_Treatment_CaSki_DMSO_control	CaSki_13-3L3A-biotin	No	lm
CCT5	sp|P48643|TCPE_HUMAN	3.10673	1.6114	1.36115	Factor_Treatment_CaSki_DMSO_control	CaSki_13-3L3A-biotin	No	lm
RPL13	sp|P26373|RL13_HUMAN	3.26647	1.61655	1.36115	Factor_Treatment_CaSki_DMSO_control	CaSki_13-3L3A-biotin	No	lm
SQSTM1	sp|Q13501|SQSTM_HUMAN	5.23404	1.61561	1.36115	Factor_Treatment_CaSki_DMSO_control	CaSki_13-3L3A-biotin	No	lm
RPL37	sp|P61927|RL37_HUMAN	1.31964	1.61037	1.36115	Factor_Treatment_CaSki_DMSO_control	CaSki_13-3L3A-biotin	No	lm
	tr|F5H423|F5H423_HUMAN	3.81504	1.60821	1.36105	Factor_Treatment_CaSki_DMSO_control	CaSki_13-3L3A-biotin	No	lm
RPS8	sp|P62241|RS8_HUMAN	2.92914	1.60475	1.35966	Factor_Treatment_CaSki_DMSO_control	CaSki_13-3L3A-biotin	No	lm
RPL31	sp|P62899|RL31_HUMAN	3.25792	1.60207	1.35904	Factor_Treatment_CaSki_DMSO_control	CaSki_13-3L3A-biotin	No	lm
RPL4	sp|P36578|RL4_HUMAN	3.66245	1.57799	1.337	Factor_Treatment_CaSki_DMSO_control	CaSki_13-3L3A-biotin	No	lm
RPS7	sp|P62081|RS7_HUMAN	3.59034	1.575	1.33604	Factor_Treatment_CaSki_DMSO_control	CaSki_13-3L3A-biotin	No	lm
TMPO	sp|P42167|LAP2B_HUMAN	4.13658	1.56585	1.33235	Factor_Treatment_CaSki_DMSO_control	CaSki_13-3L3A-biotin	No	lm
PPP6R1	sp|Q9UPN7|PP6R1_HUMAN	3.10012	1.56527	1.33235	Factor_Treatment_CaSki_DMSO_control	CaSki_13-3L3A-biotin	No	lm
HEATR1	sp|Q9H583|HEAT1_HUMAN	4.7344	1.56629	1.33235	Factor_Treatment_CaSki_DMSO_control	CaSki_13-3L3A-biotin	No	lm
RPS18	sp|P62269|RS18_HUMAN	3.20533	1.56178	1.33095	Factor_Treatment_CaSki_DMSO_control	CaSki_13-3L3A-biotin	No	lm
C17orf75	sp|Q9HAS0|NJMU_HUMAN	2.85064	1.55988	1.33095	Factor_Treatment_CaSki_DMSO_control	CaSki_13-3L3A-biotin	No	lm
EMD	sp|P50402|EMD_HUMAN	4.79397	1.55522	1.32827	Factor_Treatment_CaSki_DMSO_control	CaSki_13-3L3A-biotin	No	lm
TNFAIP2	sp|Q03169|TNAP2_HUMAN	3.13703	1.54596	1.32725	Factor_Treatment_CaSki_DMSO_control	CaSki_13-3L3A-biotin	No	lm
RPL17-C18orf32	tr|A0A0A6YYL6|A0A0A6YYL6_HUMAN	2.71608	1.54734	1.32725	Factor_Treatment_CaSki_DMSO_control	CaSki_13-3L3A-biotin	No	lm
RPS14	sp|P62263|RS14_HUMAN	3.71032	1.54812	1.32725	Factor_Treatment_CaSki_DMSO_control	CaSki_13-3L3A-biotin	No	lm
TMOD3	sp|Q9NYL9|TMOD3_HUMAN	4.1016	1.54444	1.32725	Factor_Treatment_CaSki_DMSO_control	CaSki_13-3L3A-biotin	No	lm
ACACB	sp|O00763|ACACB_HUMAN	0.481482	1.54553	1.32725	Factor_Treatment_CaSki_DMSO_control	CaSki_13-3L3A-biotin	No	lmer
RPL11	sp|P62913|RL11_HUMAN	4.00443	1.54225	1.32698	Factor_Treatment_CaSki_DMSO_control	CaSki_13-3L3A-biotin	No	lm
RPL7	sp|P18124|RL7_HUMAN	4.09411	1.53065	1.32111	Factor_Treatment_CaSki_DMSO_control	CaSki_13-3L3A-biotin	No	lm
RPL23A	tr|A8MUS3|A8MUS3_HUMAN	4.11808	1.53085	1.32111	Factor_Treatment_CaSki_DMSO_control	CaSki_13-3L3A-biotin	No	lm
TMEM165	sp|Q9HC07|TM165_HUMAN	3.88973	1.53343	1.32111	Factor_Treatment_CaSki_DMSO_control	CaSki_13-3L3A-biotin	No	lm
RPL30	sp|P62888|RL30_HUMAN	4.13984	1.52513	1.31937	Factor_Treatment_CaSki_DMSO_control	CaSki_13-3L3A-biotin	No	lm
EPRS1	sp|P07814|SYEP_HUMAN	3.31369	1.52603	1.31937	Factor_Treatment_CaSki_DMSO_control	CaSki_13-3L3A-biotin	No	lm
M6PR	sp|P20645|MPRD_HUMAN	5.43057	1.51996	1.31607	Factor_Treatment_CaSki_DMSO_control	CaSki_13-3L3A-biotin	No	lm
IPO4	sp|Q8TEX9|IPO4_HUMAN	2.8398	1.51361	1.31159	Factor_Treatment_CaSki_DMSO_control	CaSki_13-3L3A-biotin	No	lm
TUFM	sp|P49411|EFTU_HUMAN	3.3535	1.50635	1.30619	Factor_Treatment_CaSki_DMSO_control	CaSki_13-3L3A-biotin	No	lm
RPS3A	sp|P61247|RS3A_HUMAN	3.72474	1.49986	1.30155	Factor_Treatment_CaSki_DMSO_control	CaSki_13-3L3A-biotin	No	lm
SUB1	sp|P53999|TCP4_HUMAN	2.71753	1.49552	1.29905	Factor_Treatment_CaSki_DMSO_control	CaSki_13-3L3A-biotin	No	lm
ESYT2	sp|A0FGR8|ESYT2_HUMAN	3.70431	1.49186	1.29724	Factor_Treatment_CaSki_DMSO_control	CaSki_13-3L3A-biotin	No	lm
H3-3B	tr|K7ES00|K7ES00_HUMAN	1.68819	1.48957	1.29678	Factor_Treatment_CaSki_DMSO_control	CaSki_13-3L3A-biotin	No	lm
IARS1	sp|P41252|SYIC_HUMAN	3.29652	1.48674	1.29638	Factor_Treatment_CaSki_DMSO_control	CaSki_13-3L3A-biotin	No	lm
LUC7L2	tr|A0A0A6YYJ8|A0A0A6YYJ8_HUMAN	1.80809	1.48555	1.29638	Factor_Treatment_CaSki_DMSO_control	CaSki_13-3L3A-biotin	No	lm
GNB2	sp|P62879|GBB2_HUMAN	4.52916	1.47066	1.2833	Factor_Treatment_CaSki_DMSO_control	CaSki_13-3L3A-biotin	No	lm
RBM39	sp|Q14498|RBM39_HUMAN	1.34542	1.4649	1.28114	Factor_Treatment_CaSki_DMSO_control	CaSki_13-3L3A-biotin	No	lm
PABPC1	sp|P11940|PABP1_HUMAN	4.05555	1.4649	1.28114	Factor_Treatment_CaSki_DMSO_control	CaSki_13-3L3A-biotin	No	lm
MPRIP	tr|A0A494BZV2|A0A494BZV2_HUMAN	3.16841	1.4596	1.27762	Factor_Treatment_CaSki_DMSO_control	CaSki_13-3L3A-biotin	No	lmer
IMMT	sp|Q16891|MIC60_HUMAN	6.0525	1.45204	1.27359	Factor_Treatment_CaSki_DMSO_control	CaSki_13-3L3A-biotin	No	lm
NCL	sp|P19338|NUCL_HUMAN	4.07715	1.45203	1.27359	Factor_Treatment_CaSki_DMSO_control	CaSki_13-3L3A-biotin	No	lm
RPL38	sp|P63173|RL38_HUMAN	2.9517	1.44977	1.2731	Factor_Treatment_CaSki_DMSO_control	CaSki_13-3L3A-biotin	No	lm
TUBA3D	sp|P0DPH8|TBA3D_HUMAN	2.78909	1.43426	1.26008	Factor_Treatment_CaSki_DMSO_control	CaSki_13-3L3A-biotin	No	lm
ARL6IP4	sp|Q66PJ3|AR6P4_HUMAN	1.16229	1.43325	1.26008	Factor_Treatment_CaSki_DMSO_control	CaSki_13-3L3A-biotin	No	lm
RPN2	sp|P04844|RPN2_HUMAN	5.80884	1.42784	1.2564	Factor_Treatment_CaSki_DMSO_control	CaSki_13-3L3A-biotin	No	lm
RAE1	tr|E9PQ57|E9PQ57_HUMAN	1.68304	1.42236	1.25266	Factor_Treatment_CaSki_DMSO_control	CaSki_13-3L3A-biotin	No	lm
DNAJA2	sp|O60884|DNJA2_HUMAN	3.74007	1.41574	1.25045	Factor_Treatment_CaSki_DMSO_control	CaSki_13-3L3A-biotin	No	lm
CAPRIN1	sp|Q14444|CAPR1_HUMAN	5.25213	1.41598	1.25045	Factor_Treatment_CaSki_DMSO_control	CaSki_13-3L3A-biotin	No	lm
HSP90AA1	sp|P07900|HS90A_HUMAN	1.64201	1.41499	1.25045	Factor_Treatment_CaSki_DMSO_control	CaSki_13-3L3A-biotin	No	lmer
SDF4	sp|Q9BRK5|CAB45_HUMAN	5.05051	1.40909	1.24625	Factor_Treatment_CaSki_DMSO_control	CaSki_13-3L3A-biotin	No	lm
RPL3	sp|P39023|RL3_HUMAN	4.09698	1.40649	1.24536	Factor_Treatment_CaSki_DMSO_control	CaSki_13-3L3A-biotin	No	lm
PPM1G	sp|O15355|PPM1G_HUMAN	2.03476	1.39746	1.23802	Factor_Treatment_CaSki_DMSO_control	CaSki_13-3L3A-biotin	No	lm
RPS13	sp|P62277|RS13_HUMAN	2.98054	1.39566	1.2379	Factor_Treatment_CaSki_DMSO_control	CaSki_13-3L3A-biotin	No	lm
EXOC4	sp|Q96A65|EXOC4_HUMAN	3.2955	1.39351	1.23757	Factor_Treatment_CaSki_DMSO_control	CaSki_13-3L3A-biotin	No	lm
YWHAE	sp|P62258|1433E_HUMAN	6.07956	1.39197	1.23757	Factor_Treatment_CaSki_DMSO_control	CaSki_13-3L3A-biotin	No	lm
HNRNPF	sp|P52597|HNRPF_HUMAN	6.22083	1.3663	1.21356	Factor_Treatment_CaSki_DMSO_control	CaSki_13-3L3A-biotin	No	lm
RPL27A	sp|P46776|RL27A_HUMAN	1.87903	1.36293	1.21306	Factor_Treatment_CaSki_DMSO_control	CaSki_13-3L3A-biotin	No	lm
SEC16A	sp|O15027|SC16A_HUMAN	3.21713	1.36098	1.21306	Factor_Treatment_CaSki_DMSO_control	CaSki_13-3L3A-biotin	No	lm
MYO1B	sp|O43795|MYO1B_HUMAN	3.21485	1.36083	1.21306	Factor_Treatment_CaSki_DMSO_control	CaSki_13-3L3A-biotin	No	lmer
GNAI2	sp|P04899|GNAI2_HUMAN	4.56241	1.35747	1.21134	Factor_Treatment_CaSki_DMSO_control	CaSki_13-3L3A-biotin	No	lm
CFL1	tr|E9PK25|E9PK25_HUMAN	2.84721	1.35506	1.21057	Factor_Treatment_CaSki_DMSO_control	CaSki_13-3L3A-biotin	No	lm
ANXA2	sp|P07355|ANXA2_HUMAN	2.79117	1.34287	1.20121	Factor_Treatment_CaSki_DMSO_control	CaSki_13-3L3A-biotin	No	lmer
COPA	sp|P53621|COPA_HUMAN	2.85324	1.34245	1.20121	Factor_Treatment_CaSki_DMSO_control	CaSki_13-3L3A-biotin	No	lm
PRMT1	sp|Q99873|ANM1_HUMAN	3.05306	1.33835	1.1999	Factor_Treatment_CaSki_DMSO_control	CaSki_13-3L3A-biotin	No	lm
SEC61B	sp|P60468|SC61B_HUMAN	3.38008	1.33791	1.1999	Factor_Treatment_CaSki_DMSO_control	CaSki_13-3L3A-biotin	No	lm
PKM	sp|P14618|KPYM_HUMAN	2.47943	1.32714	1.19457	Factor_Treatment_CaSki_DMSO_control	CaSki_13-3L3A-biotin	No	lm
CLTA	sp|P09496|CLCA_HUMAN	4.87865	1.32619	1.19457	Factor_Treatment_CaSki_DMSO_control	CaSki_13-3L3A-biotin	No	lm
DSTN	sp|P60981|DEST_HUMAN	2.91214	1.32898	1.19457	Factor_Treatment_CaSki_DMSO_control	CaSki_13-3L3A-biotin	No	lm
CLTC	tr|A0A087WVQ6|A0A087WVQ6_HUMAN	3.45232	1.32681	1.19457	Factor_Treatment_CaSki_DMSO_control	CaSki_13-3L3A-biotin	No	lmer
ATXN10	sp|Q9UBB4|ATX10_HUMAN	6.46802	1.31784	1.1878	Factor_Treatment_CaSki_DMSO_control	CaSki_13-3L3A-biotin	No	lm
EFEMP1	sp|Q12805|FBLN3_HUMAN	6.57357	1.30705	1.17859	Factor_Treatment_CaSki_DMSO_control	CaSki_13-3L3A-biotin	No	lm
TPM4	sp|P67936|TPM4_HUMAN	4.15893	1.29041	1.16352	Factor_Treatment_CaSki_DMSO_control	CaSki_13-3L3A-biotin	No	lm
CAV1	sp|Q03135|CAV1_HUMAN	5.44482	1.28698	1.16166	Factor_Treatment_CaSki_DMSO_control	CaSki_13-3L3A-biotin	No	lm
TMPO	sp|P42166|LAP2A_HUMAN	3.2989	1.28435	1.16058	Factor_Treatment_CaSki_DMSO_control	CaSki_13-3L3A-biotin	No	lmer
RPL10A	sp|P62906|RL10A_HUMAN	4.57317	1.27481	1.15259	Factor_Treatment_CaSki_DMSO_control	CaSki_13-3L3A-biotin	No	lm
RAI14	sp|Q9P0K7|RAI14_HUMAN	3.1164	1.26978	1.15065	Factor_Treatment_CaSki_DMSO_control	CaSki_13-3L3A-biotin	No	lmer
NCEH1	tr|A0A0A0MTJ9|A0A0A0MTJ9_HUMAN	4.63803	1.27039	1.15065	Factor_Treatment_CaSki_DMSO_control	CaSki_13-3L3A-biotin	No	lm
LRRC59	sp|Q96AG4|LRC59_HUMAN	2.97763	1.26553	1.14794	Factor_Treatment_CaSki_DMSO_control	CaSki_13-3L3A-biotin	No	lm
CLTB	sp|P09497|CLCB_HUMAN	3.71333	1.256	1.13995	Factor_Treatment_CaSki_DMSO_control	CaSki_13-3L3A-biotin	No	lmer
COL17A1	sp|Q9UMD9|COHA1_HUMAN	4.15479	1.25274	1.13821	Factor_Treatment_CaSki_DMSO_control	CaSki_13-3L3A-biotin	No	lm
DLAT	sp|P10515|ODP2_HUMAN	4.2017	1.25094	1.13793	Factor_Treatment_CaSki_DMSO_control	CaSki_13-3L3A-biotin	No	lm
SFPQ	sp|P23246|SFPQ_HUMAN	7.77977	1.24136	1.12986	Factor_Treatment_CaSki_DMSO_control	CaSki_13-3L3A-biotin	No	lm
ILF2	sp|Q12905|ILF2_HUMAN	6.78983	1.21391	1.10745	Factor_Treatment_CaSki_DMSO_control	CaSki_13-3L3A-biotin	No	lm
CCN2	sp|P29279|CCN2_HUMAN	2.17054	1.2137	1.10745	Factor_Treatment_CaSki_DMSO_control	CaSki_13-3L3A-biotin	No	lm
RPA1	sp|P27694|RFA1_HUMAN	3.70101	1.21293	1.10745	Factor_Treatment_CaSki_DMSO_control	CaSki_13-3L3A-biotin	No	lmer
H4C1	sp|P62805|H4_HUMAN	4.60558	1.21298	1.10745	Factor_Treatment_CaSki_DMSO_control	CaSki_13-3L3A-biotin	No	lm
MTOR	sp|P42345|MTOR_HUMAN	5.03859	1.19716	1.09316	Factor_Treatment_CaSki_DMSO_control	CaSki_13-3L3A-biotin	No	lm
H2AX	sp|P16104|H2AX_HUMAN	5.96489	1.18352	1.08114	Factor_Treatment_CaSki_DMSO_control	CaSki_13-3L3A-biotin	No	lm
SSR1	tr|C9IZQ1|C9IZQ1_HUMAN	3.99402	1.18217	1.08114	Factor_Treatment_CaSki_DMSO_control	CaSki_13-3L3A-biotin	No	lm
RPL13A	tr|M0QYS1|M0QYS1_HUMAN	1.01463	1.18048	1.08093	Factor_Treatment_CaSki_DMSO_control	CaSki_13-3L3A-biotin	No	lm
UBC	sp|P0CG48|UBC_HUMAN	6.16481	1.1753	1.07721	Factor_Treatment_CaSki_DMSO_control	CaSki_13-3L3A-biotin	No	lm
IPO9	sp|Q96P70|IPO9_HUMAN	3.36787	1.16958	1.07297	Factor_Treatment_CaSki_DMSO_control	CaSki_13-3L3A-biotin	No	lm
HNRNPM	sp|P52272|HNRPM_HUMAN	5.65283	1.16179	1.06773	Factor_Treatment_CaSki_DMSO_control	CaSki_13-3L3A-biotin	No	lm
PSMD2	sp|Q13200|PSMD2_HUMAN	2.82838	1.16143	1.06773	Factor_Treatment_CaSki_DMSO_control	CaSki_13-3L3A-biotin	No	lm
PSMD11	sp|O00231|PSD11_HUMAN	2.50092	1.15415	1.0619	Factor_Treatment_CaSki_DMSO_control	CaSki_13-3L3A-biotin	No	lm
HACD3	sp|Q9P035|HACD3_HUMAN	4.41385	1.15077	1.05996	Factor_Treatment_CaSki_DMSO_control	CaSki_13-3L3A-biotin	No	lm
CKAP4	sp|Q07065|CKAP4_HUMAN	3.89784	1.14182	1.05299	Factor_Treatment_CaSki_DMSO_control	CaSki_13-3L3A-biotin	No	lm
PPP2R1B	sp|P30154|2AAB_HUMAN	5.8521	1.14092	1.05299	Factor_Treatment_CaSki_DMSO_control	CaSki_13-3L3A-biotin	No	lm
	tr|A0A0U1RRH7|A0A0U1RRH7_HUMAN	3.45355	1.1359	1.0494	Factor_Treatment_CaSki_DMSO_control	CaSki_13-3L3A-biotin	No	lm
BOLA2-SMG1P6	tr|H3BVE0|H3BVE0_HUMAN	3.16732	1.10321	1.01813	Factor_Treatment_CaSki_DMSO_control	CaSki_13-3L3A-biotin	No	lm
HSP90B1	sp|P14625|ENPL_HUMAN	1.66582	1.10122	1.01757	Factor_Treatment_CaSki_DMSO_control	CaSki_13-3L3A-biotin	No	lm
GAPDH	sp|P04406|G3P_HUMAN	9.82895	1.09245	1.01021	Factor_Treatment_CaSki_DMSO_control	CaSki_13-3L3A-biotin	No	lm
PCM1	sp|Q15154|PCM1_HUMAN	5.87562	1.07716	0.997746	Factor_Treatment_CaSki_DMSO_control	CaSki_13-3L3A-biotin	No	lm
MAP1B	sp|P46821|MAP1B_HUMAN	1.95663	1.07805	0.997746	Factor_Treatment_CaSki_DMSO_control	CaSki_13-3L3A-biotin	No	lm
RBBP7	sp|Q16576|RBBP7_HUMAN	5.87739	1.04361	0.965601	Factor_Treatment_CaSki_DMSO_control	CaSki_13-3L3A-biotin	No	lm
RPA3	sp|P35244|RFA3_HUMAN	2.00238	1.02881	0.953592	Factor_Treatment_CaSki_DMSO_control	CaSki_13-3L3A-biotin	No	lm
PTBP1	tr|A0A0U1RRM4|A0A0U1RRM4_HUMAN	5.87727	1.0301	0.953592	Factor_Treatment_CaSki_DMSO_control	CaSki_13-3L3A-biotin	No	lm
CIP2A	tr|A0A087X211|A0A087X211_HUMAN	2.70514	1.02209	0.948262	Factor_Treatment_CaSki_DMSO_control	CaSki_13-3L3A-biotin	No	lm
ABCB6	sp|Q9NP58|ABCB6_HUMAN	5.77689	1.01713	0.944688	Factor_Treatment_CaSki_DMSO_control	CaSki_13-3L3A-biotin	No	lm
GOLGB1	sp|Q14789|GOGB1_HUMAN	2.68927	0.990711	0.919648	Factor_Treatment_CaSki_DMSO_control	CaSki_13-3L3A-biotin	No	lm
BANF1	sp|O75531|BAF_HUMAN	4.08678	0.987914	0.918227	Factor_Treatment_CaSki_DMSO_control	CaSki_13-3L3A-biotin	No	lm
RPL7A	sp|P62424|RL7A_HUMAN	6.31821	0.985494	0.91718	Factor_Treatment_CaSki_DMSO_control	CaSki_13-3L3A-biotin	No	lm
KRAS	sp|P01116|RASK_HUMAN	4.0706	0.977744	0.910798	Factor_Treatment_CaSki_DMSO_control	CaSki_13-3L3A-biotin	No	lm
IGF2R	sp|P11717|MPRI_HUMAN	1.51574	0.965493	0.89991	Factor_Treatment_CaSki_DMSO_control	CaSki_13-3L3A-biotin	No	lm
SELENOK	sp|Q9Y6D0|SELK_HUMAN	5.12221	0.960152	0.895928	Factor_Treatment_CaSki_DMSO_control	CaSki_13-3L3A-biotin	No	lm
RPLP2	sp|P05387|RLA2_HUMAN	6.23124	0.957389	0.895737	Factor_Treatment_CaSki_DMSO_control	CaSki_13-3L3A-biotin	No	lm
RTN4	sp|Q9NQC3|RTN4_HUMAN	2.23508	0.957255	0.895737	Factor_Treatment_CaSki_DMSO_control	CaSki_13-3L3A-biotin	No	lm
ECH1	sp|Q13011|ECH1_HUMAN	0.710927	0.952688	0.892517	Factor_Treatment_CaSki_DMSO_control	CaSki_13-3L3A-biotin	No	lm
PAWR	sp|Q96IZ0|PAWR_HUMAN	6.68581	0.940069	0.88124	Factor_Treatment_CaSki_DMSO_control	CaSki_13-3L3A-biotin	No	lm
MCCC2	sp|Q9HCC0|MCCB_HUMAN	0.494941	0.931695	0.874467	Factor_Treatment_CaSki_DMSO_control	CaSki_13-3L3A-biotin	No	lmer
PKP2	sp|Q99959|PKP2_HUMAN	2.61137	0.930624	0.874467	Factor_Treatment_CaSki_DMSO_control	CaSki_13-3L3A-biotin	No	lm
DIABLO	sp|Q9NR28|DBLOH_HUMAN	5.90571	0.926703	0.871876	Factor_Treatment_CaSki_DMSO_control	CaSki_13-3L3A-biotin	No	lm
TRIM28	sp|Q13263|TIF1B_HUMAN	2.10703	0.911901	0.858401	Factor_Treatment_CaSki_DMSO_control	CaSki_13-3L3A-biotin	No	lm
LARP1	sp|Q6PKG0|LARP1_HUMAN	5.46377	0.866923	0.814745	Factor_Treatment_CaSki_DMSO_control	CaSki_13-3L3A-biotin	No	lm
PPFIBP1	sp|Q86W92|LIPB1_HUMAN	1.76725	0.863534	0.812674	Factor_Treatment_CaSki_DMSO_control	CaSki_13-3L3A-biotin	No	lm
RACK1	tr|D6REE5|D6REE5_HUMAN	1.26171	0.856209	0.806663	Factor_Treatment_CaSki_DMSO_control	CaSki_13-3L3A-biotin	No	lm
EDC4	sp|Q6P2E9|EDC4_HUMAN	4.86877	0.850152	0.801917	Factor_Treatment_CaSki_DMSO_control	CaSki_13-3L3A-biotin	No	lm
TIMM13	sp|Q9Y5L4|TIM13_HUMAN	5.02377	0.826792	0.779862	Factor_Treatment_CaSki_DMSO_control	CaSki_13-3L3A-biotin	No	lm
PC	sp|P11498|PYC_HUMAN	-0.438311	0.809809	0.764182	Factor_Treatment_CaSki_DMSO_control	CaSki_13-3L3A-biotin	No	lmer
S100A6	sp|P06703|S10A6_HUMAN	4.72107	0.795222	0.750893	Factor_Treatment_CaSki_DMSO_control	CaSki_13-3L3A-biotin	No	lm
ELAVL1	sp|Q15717|ELAV1_HUMAN	6.32493	0.793418	0.750383	Factor_Treatment_CaSki_DMSO_control	CaSki_13-3L3A-biotin	No	lm
RUVBL2	sp|Q9Y230|RUVB2_HUMAN	2.37554	0.783977	0.742437	Factor_Treatment_CaSki_DMSO_control	CaSki_13-3L3A-biotin	No	lm
RUVBL1	sp|Q9Y265|RUVB1_HUMAN	4.79658	0.782895	0.742437	Factor_Treatment_CaSki_DMSO_control	CaSki_13-3L3A-biotin	No	lm
YWHAZ	sp|P63104|1433Z_HUMAN	2.85464	0.780575	0.741401	Factor_Treatment_CaSki_DMSO_control	CaSki_13-3L3A-biotin	No	lm
RHEB	sp|Q15382|RHEB_HUMAN	1.68214	0.766046	0.728151	Factor_Treatment_CaSki_DMSO_control	CaSki_13-3L3A-biotin	No	lm
SPR	sp|P35270|SPRE_HUMAN	1.74184	0.746954	0.710334	Factor_Treatment_CaSki_DMSO_control	CaSki_13-3L3A-biotin	No	lm
EIF2S1	sp|P05198|IF2A_HUMAN	5.39207	0.743551	0.708203	Factor_Treatment_CaSki_DMSO_control	CaSki_13-3L3A-biotin	No	lm
RPLP1	sp|P05386|RLA1_HUMAN	5.25905	0.733354	0.699274	Factor_Treatment_CaSki_DMSO_control	CaSki_13-3L3A-biotin	No	lm
MSH2	tr|A0A2R8YG02|A0A2R8YG02_HUMAN	3.78647	0.731199	0.698383	Factor_Treatment_CaSki_DMSO_control	CaSki_13-3L3A-biotin	No	lm
LSM14A	sp|Q8ND56|LS14A_HUMAN	0.944185	0.689669	0.658114	Factor_Treatment_CaSki_DMSO_control	CaSki_13-3L3A-biotin	No	lm
RPL14	sp|P50914|RL14_HUMAN	5.09157	0.660931	0.630846	Factor_Treatment_CaSki_DMSO_control	CaSki_13-3L3A-biotin	No	lm
FXR1	sp|P51114|FXR1_HUMAN	4.57565	0.659891	0.630846	Factor_Treatment_CaSki_DMSO_control	CaSki_13-3L3A-biotin	No	lm
MCCC1	sp|Q96RQ3|MCCA_HUMAN	0.388824	0.617078	0.589284	Factor_Treatment_CaSki_DMSO_control	CaSki_13-3L3A-biotin	No	lmer
GOLGA3	sp|Q08378|GOGA3_HUMAN	0.265383	0.605094	0.578545	Factor_Treatment_CaSki_DMSO_control	CaSki_13-3L3A-biotin	No	lm
DBT	sp|P11182|ODB2_HUMAN	0.593788	0.603801	0.578495	Factor_Treatment_CaSki_DMSO_control	CaSki_13-3L3A-biotin	No	lm
RPL22	sp|P35268|RL22_HUMAN	3.88118	0.598404	0.574337	Factor_Treatment_CaSki_DMSO_control	CaSki_13-3L3A-biotin	No	lm
HK2	sp|P52789|HXK2_HUMAN	1.42254	0.536342	0.513511	Factor_Treatment_CaSki_DMSO_control	CaSki_13-3L3A-biotin	No	lm
QSOX2	sp|Q6ZRP7|QSOX2_HUMAN	3.47389	0.513997	0.492398	Factor_Treatment_CaSki_DMSO_control	CaSki_13-3L3A-biotin	No	lm
BIRC2	sp|Q13490|BIRC2_HUMAN	4.33216	0.50735	0.48698	Factor_Treatment_CaSki_DMSO_control	CaSki_13-3L3A-biotin	No	lm
RPA2	sp|P15927|RFA2_HUMAN	1.52743	0.47659	0.457444	Factor_Treatment_CaSki_DMSO_control	CaSki_13-3L3A-biotin	No	lm
FASN	sp|P49327|FAS_HUMAN	2.21863	0.376161	0.358237	Factor_Treatment_CaSki_DMSO_control	CaSki_13-3L3A-biotin	No	lm
YWHAQ	sp|P27348|1433T_HUMAN	2.95161	0.365115	0.348409	Factor_Treatment_CaSki_DMSO_control	CaSki_13-3L3A-biotin	No	lm
HNRNPA2B1	sp|P22626|ROA2_HUMAN	0.678718	0.359606	0.344115	Factor_Treatment_CaSki_DMSO_control	CaSki_13-3L3A-biotin	No	lm
FKBP8	sp|Q14318|FKBP8_HUMAN	2.42617	0.35697	0.34269	Factor_Treatment_CaSki_DMSO_control	CaSki_13-3L3A-biotin	No	lm
LDHB	tr|A0A5F9ZHM4|A0A5F9ZHM4_HUMAN	0.359976	0.320202	0.30713	Factor_Treatment_CaSki_DMSO_control	CaSki_13-3L3A-biotin	No	lm
IPO5	tr|H0Y8C6|H0Y8C6_HUMAN	2.16499	0.286609	0.274743	Factor_Treatment_CaSki_DMSO_control	CaSki_13-3L3A-biotin	No	lm
RBM14	sp|Q96PK6|RBM14_HUMAN	1.86192	0.24637	0.235705	Factor_Treatment_CaSki_DMSO_control	CaSki_13-3L3A-biotin	No	lm
PCNT	sp|O95613|PCNT_HUMAN	0.118398	0.210775	0.201308	Factor_Treatment_CaSki_DMSO_control	CaSki_13-3L3A-biotin	No	lm
ACACA	sp|Q13085|ACACA_HUMAN	0.0994384	0.185452	0.17718	Factor_Treatment_CaSki_DMSO_control	CaSki_13-3L3A-biotin	No	lmer
NUP88	sp|Q99567|NUP88_HUMAN	0.494573	0.149084	0.142003	Factor_Treatment_CaSki_DMSO_control	CaSki_13-3L3A-biotin	No	lm
EP400	sp|Q96L91|EP400_HUMAN	-0.0872444	0.145404	0.139511	Factor_Treatment_CaSki_DMSO_control	CaSki_13-3L3A-biotin	No	lm
PCCB	tr|E7EX59|E7EX59_HUMAN	-0.055425	0.0882201	0.0838597	Factor_Treatment_CaSki_DMSO_control	CaSki_13-3L3A-biotin	No	lmer
PCCA	sp|P05165|PCCA_HUMAN	-0.0576014	0.0873858	0.0838597	Factor_Treatment_CaSki_DMSO_control	CaSki_13-3L3A-biotin	No	lmer
ACLY	sp|P53396|ACLY_HUMAN	-0.06941	0.0669478	0.0646003	Factor_Treatment_CaSki_DMSO_control	CaSki_13-3L3A-biotin	No	lm
FAU	tr|E9PR30|E9PR30_HUMAN	-0.0794294	0.0486956	0.0475234	Factor_Treatment_CaSki_DMSO_control	CaSki_13-3L3A-biotin	No	lm
LDHA	sp|P00338|LDHA_HUMAN	0.0182257	0.019612	0.019612	Factor_Treatment_CaSki_DMSO_control	CaSki_13-3L3A-biotin	No	lm
